# Supplementary material
Source: PubMed Central journal article supplement (PMC10159913)
Supplement: NIHMS1872130-supplement-SI.pdf [file NIHMS1872130-supplement-SI.pdf]

# SUPPORTING INFORMATION

## Genome Mining for Unknown-Unknown Natural Products

Danielle A. Yee,<sup>1</sup> Kanji Niwa,<sup>1</sup> Bruno Perlatti,<sup>2</sup> Mengbin Chen,<sup>1</sup> Yuqing Li,<sup>1</sup> Yi Tang<sup>1,2</sup>

<sup>1</sup>Department of Chemical and Biomolecular Engineering, <sup>2</sup>Department of Chemistry and Biochemistry, University of California, Los Angeles, CA 90095, USA

## Table of Contents

|                                                                                                                                                                                          |    |
|------------------------------------------------------------------------------------------------------------------------------------------------------------------------------------------|----|
| SUPPLEMENTARY TABLES .....                                                                                                                                                               | 5  |
| Table S1. Bioinformatics analysis of the <i>ank</i> gene cluster from <i>A. thermomutatus</i> .....                                                                                      | 5  |
| Table S2. Bioinformatics analysis of the <i>ava</i> gene cluster from <i>A. versicolor</i> dI-29 .....                                                                                   | 6  |
| Table S3. Plasmids used in this study .....                                                                                                                                              | 7  |
| Table S4. cDNA sequences of <i>ankD</i> and <i>ankG</i> and gDNA sequences of <i>pthA</i> , <i>ateA</i> , <i>amaA</i> , <i>anoA</i> , <i>eshA</i> , and <i>avaA-D</i> .....              | 8  |
| Table S5. Primers used in this study .....                                                                                                                                               | 14 |
| Table S6. AnkA homologs .....                                                                                                                                                            | 18 |
| Table S7. Spectroscopic data of compound <b>1</b> .....                                                                                                                                  | 22 |
| Table S8. Spectroscopic data of compound <b>2</b> .....                                                                                                                                  | 24 |
| Table S9. Spectroscopic data of compound <b>3</b> .....                                                                                                                                  | 26 |
| Table S10. Spectroscopic data of compound <b>3b</b> .....                                                                                                                                | 27 |
| Table S11. Spectroscopic data for compound <b>4</b> .....                                                                                                                                | 28 |
| Table S12. Spectroscopic data of compound <b>5</b> .....                                                                                                                                 | 30 |
| Table S13. Spectroscopic data of compound <b>6</b> .....                                                                                                                                 | 31 |
| Table S14. Spectroscopic data of compound <b>9</b> .....                                                                                                                                 | 32 |
| Table S15. Spectroscopic data of compound <b>10</b> .....                                                                                                                                | 33 |
| Table S16. Spectroscopic data of compound <b>13</b> .....                                                                                                                                | 34 |
| Table S17. Spectroscopic data of compound <b>14</b> .....                                                                                                                                | 35 |
| Table S18. Spectroscopic data of compound <b>15</b> .....                                                                                                                                | 36 |
| Table S19. Spectroscopic data of compound <b>16</b> .....                                                                                                                                | 37 |
| Table S20. Spectroscopic data of compound <b>17</b> .....                                                                                                                                | 38 |
| Table S21. Spectroscopic data of compound <b>18</b> .....                                                                                                                                | 39 |
| SUPPLEMENTARY FIGURES .....                                                                                                                                                              | 40 |
| Figure S1. The <i>ank</i> cluster and homologous clusters .....                                                                                                                          | 40 |
| Figure S2. The <i>ava</i> cluster and homologous clusters .....                                                                                                                          | 41 |
| Figure S3. RCDPS homologs clustered with biosynthetic tailoring genes .....                                                                                                              | 42 |
| Figure S4. Clustal omega (1.2.4) multiple sequence alignment of RCDPS homologs .....                                                                                                     | 44 |
| Figure S5. Proposed mechanism of PLP-dependent enzyme AnkD .....                                                                                                                         | 45 |
| Figure S6. Proposed tRNA-dependent mechanism of AvaA .....                                                                                                                               | 46 |
| Figure S7. The proposed mechanism for the FMO AvaB .....                                                                                                                                 | 47 |
| Figure S8. RCSB PDB pairwise structural alignment of the predicted structure of AvaA to the bacterial CDPS AlbC S37C mutant .....                                                        | 48 |
| Figure S9. SDS-PAGE (12%) analysis of (A) AnkD, (B) AvaA, (C) Yeast ArgRS and TrpRS .....                                                                                                | 50 |
| Figure S10. QTOF analysis of extracts from expression of <i>anka-G</i> in <i>A. nidulans</i> showing production of compound 3b (MWT = 580) .....                                         | 51 |
| Figure S11. QTOF analysis of extracts from the expression of <i>anka-D</i> in <i>A. nidulans</i> .....                                                                                   | 52 |
| Figure S12. QTOF analysis of the extracts from AnkD <i>in vitro</i> reactions .....                                                                                                      | 53 |
| Figure S13. QTOF analysis of extracts from expression of <i>anka</i> , <i>pthA</i> , <i>ateA</i> , <i>amaA</i> , <i>avaA</i> , <i>anoA</i> , and <i>eshA</i> in <i>A. nidulans</i> ..... | 54 |
| Figure S14. LC-MS analysis of extracts from expression of AnkA in yeast .....                                                                                                            | 55 |
| Figure S15. LC-MS analysis of extracts from expression of AmaA in yeast .....                                                                                                            | 55 |
| Figure S16. QTOF analysis of the extracts from expression of <i>avaA</i> in <i>E. coli</i> BL21 .....                                                                                    | 56 |
| Figure S17. QTOF analysis of the extracts from <i>in vitro</i> reactions with desalted yeast lysates .....                                                                               | 56 |
| Figure S18. LC-MS analysis of the extracts from yeast expression of AvaA mutants E432A, Y515A, and Y515F .....                                                                           | 57 |
| Figure S19. QTOF analysis of the extracts from yeast expression of AvaA mutants C193A, C193S, C193T, D428A, D429A, Y392A, and Y392F .....                                                | 59 |

|                                                                                                                                             |    |
|---------------------------------------------------------------------------------------------------------------------------------------------|----|
| Figure S20. Marfey's analysis to determine the stereochemistry of Trp in compound <b>13</b> .....                                           | 60 |
| Figure S21. QTOF analysis of extracts from expression of <i>ava</i> pathway genes in <i>A. nidulans</i> .....                               | 61 |
| Figure S22. RNA-PAGE purification of total yeast RNA for isolation of tRNA.....                                                             | 62 |
| Figure S23. <i>In vitro</i> assays with purified AvaA, ArgRS, TrpRS, unlabeled substrates, and cofactors<br>with various RNA fractions..... | 62 |
| Figure S24. Sanger sequencing of RT-PCR product of tRNA <sup>Trp</sup> .....                                                                | 63 |
| Figure S25. <sup>1</sup> H NMR spectrum of compound <b>1</b> in D <sub>2</sub> O 0.5% TFA- <i>d</i> (500 MHz). .....                        | 64 |
| Figure S26. <sup>13</sup> C NMR spectrum of compound <b>1</b> in D <sub>2</sub> O 0.5% TFA- <i>d</i> (125 MHz). .....                       | 64 |
| Figure S27. <sup>1</sup> H- <sup>1</sup> H COSY spectrum of compound <b>1</b> in D <sub>2</sub> O 0.5% TFA- <i>d</i> (500 MHz). .....       | 65 |
| Figure S28. HSQC spectrum of compound <b>1</b> in D <sub>2</sub> O 0.5% TFA- <i>d</i> (500 MHz). .....                                      | 65 |
| Figure S29. HMBC spectrum of compound <b>1</b> in D <sub>2</sub> O 0.5% TFA- <i>d</i> (500 MHz). .....                                      | 66 |
| Figure S30. <sup>1</sup> H NMR spectrum of compound <b>2</b> in DMSO- <i>d</i> <sub>6</sub> 0.5% TFA- <i>d</i> (500 MHz) .....              | 67 |
| Figure S31. <sup>13</sup> C NMR spectrum of compound <b>2</b> in DMSO- <i>d</i> <sub>6</sub> 0.5% TFA- <i>d</i> (125 MHz) .....             | 67 |
| Figure S32. HSQC spectrum of compound <b>2</b> in DMSO- <i>d</i> <sub>6</sub> 0.5% TFA- <i>d</i> (500 MHz). .....                           | 68 |
| Figure S33. <sup>1</sup> H NMR spectrum of compound <b>3</b> in D <sub>2</sub> O 0.5% TFA- <i>d</i> (500 MHz). .....                        | 69 |
| Figure S34. <sup>13</sup> C NMR spectrum of compound <b>3</b> in D <sub>2</sub> O 0.5% TFA- <i>d</i> (125 MHz). .....                       | 69 |
| Figure S35. <sup>1</sup> H- <sup>1</sup> H COSY spectrum of compound <b>3</b> in D <sub>2</sub> O 0.5% TFA- <i>d</i> (500 MHz). .....       | 70 |
| Figure S36. HSQC spectrum of compound <b>3</b> in D <sub>2</sub> O 0.5% TFA- <i>d</i> (500 MHz). .....                                      | 70 |
| Figure S37. HMBC spectrum of compound <b>3</b> in D <sub>2</sub> O 0.5% TFA- <i>d</i> (500 MHz). .....                                      | 71 |
| Figure S38. <sup>1</sup> H NMR spectrum of compound <b>3b</b> in D <sub>2</sub> O 0.5% TFA- <i>d</i> (500 MHz). .....                       | 72 |
| Figure S39. <sup>13</sup> C NMR spectrum of compound <b>3b</b> in D <sub>2</sub> O 0.5% TFA- <i>d</i> (125 MHz). .....                      | 72 |
| Figure S40. <sup>1</sup> H- <sup>1</sup> H COSY spectrum of compound <b>3b</b> in D <sub>2</sub> O 0.5% TFA- <i>d</i> (500 MHz). .....      | 73 |
| Figure S41. HSQC spectrum of compound <b>3b</b> in D <sub>2</sub> O 0.5% TFA- <i>d</i> (500 MHz). .....                                     | 73 |
| Figure S42. HMBC spectrum of compound <b>3b</b> in D <sub>2</sub> O 0.5% TFA- <i>d</i> (500 MHz). .....                                     | 74 |
| Figure S43. <sup>1</sup> H NMR spectrum of compound <b>4</b> in DMSO- <i>d</i> <sub>6</sub> 0.5% TFA- <i>d</i> (500 MHz) .....              | 75 |
| Figure S44. <sup>13</sup> C NMR spectrum of compound <b>4</b> in DMSO- <i>d</i> <sub>6</sub> 0.5% TFA- <i>d</i> (125 MHz) .....             | 75 |
| Figure S45. HSQC spectrum of compound <b>4</b> in DMSO- <i>d</i> <sub>6</sub> 0.5% TFA- <i>d</i> (500 MHz). .....                           | 76 |
| Figure S46. <sup>1</sup> H NMR spectrum of compound <b>5</b> in D <sub>2</sub> O 0.5% TFA- <i>d</i> (500 MHz). .....                        | 77 |
| Figure S47. <sup>1</sup> H NMR spectrum of compound <b>5</b> in D <sub>2</sub> O 0.5% TFA- <i>d</i> (125 MHz). .....                        | 77 |
| Figure S48. <sup>1</sup> H- <sup>1</sup> H COSY spectrum of compound <b>5</b> in D <sub>2</sub> O 0.5% TFA- <i>d</i> (500 MHz). .....       | 78 |
| Figure S49. HSQC spectrum of compound <b>5</b> in D <sub>2</sub> O 0.5% TFA- <i>d</i> (500 MHz). .....                                      | 78 |
| Figure S50. HMBC spectrum of compound <b>5</b> in D <sub>2</sub> O 0.5% TFA- <i>d</i> (500 MHz). .....                                      | 79 |
| Figure S51. <sup>1</sup> H NMR spectrum of compound <b>6</b> in D <sub>2</sub> O 0.5% TFA- <i>d</i> (500 MHz). .....                        | 80 |
| Figure S52. <sup>13</sup> C NMR spectrum of compound <b>6</b> in D <sub>2</sub> O 0.5% TFA- <i>d</i> (125 MHz). .....                       | 80 |
| Figure S53. <sup>1</sup> H- <sup>1</sup> H COSY spectrum of compound <b>6</b> in D <sub>2</sub> O 0.5% TFA- <i>d</i> (500 MHz). .....       | 81 |
| Figure S54. HSQC spectrum of compound <b>6</b> in D <sub>2</sub> O 0.5% TFA- <i>d</i> (500 MHz). .....                                      | 81 |
| Figure S55. HMBC spectrum of compound <b>6</b> in D <sub>2</sub> O 0.5% TFA- <i>d</i> (500 MHz). .....                                      | 82 |
| Figure S56. <sup>1</sup> H NMR spectrum of compound <b>9</b> in D <sub>2</sub> O (500 MHz). .....                                           | 83 |
| Figure S57. <sup>13</sup> C NMR spectrum of compound <b>9</b> in D <sub>2</sub> O (125 MHz). .....                                          | 83 |
| Figure S58. <sup>1</sup> H- <sup>1</sup> H COSY spectrum of compound <b>9</b> in D <sub>2</sub> O (500 MHz). .....                          | 84 |
| Figure S59. HSQC spectrum of compound <b>9</b> in D <sub>2</sub> O (500 MHz). .....                                                         | 84 |
| Figure S60. HMBC spectrum of compound <b>9</b> in D <sub>2</sub> O (500 MHz). .....                                                         | 85 |
| Figure S61. <sup>1</sup> H NMR spectrum of compound <b>10</b> in D <sub>2</sub> O (500 MHz). .....                                          | 86 |
| Figure S62. <sup>13</sup> C NMR spectrum of compound <b>10</b> in D <sub>2</sub> O (125 MHz). .....                                         | 86 |
| Figure S63. <sup>1</sup> H- <sup>1</sup> H COSY spectrum of compound <b>10</b> in D <sub>2</sub> O (500 MHz). .....                         | 87 |
| Figure S64. HSQC spectrum of compound <b>10</b> in D <sub>2</sub> O (500 MHz). .....                                                        | 87 |
| Figure S65. HMBC spectrum of compound <b>10</b> in D <sub>2</sub> O (500 MHz). .....                                                        | 88 |
| Figure S66. <sup>1</sup> H NMR spectrum of compound <b>13</b> in CD <sub>3</sub> OD (500 MHz). .....                                        | 89 |
| Figure S67. <sup>13</sup> C NMR spectrum of compound <b>13</b> in CD <sub>3</sub> OD (125 MHz). .....                                       | 89 |
| Figure S68. <sup>1</sup> H NMR spectrum of compound <b>14</b> in D <sub>2</sub> O (500 MHz). .....                                          | 90 |
| Figure S69. <sup>13</sup> C NMR spectrum of compound <b>14</b> in D <sub>2</sub> O (125 MHz). .....                                         | 90 |

|             |                                                                                                                       |     |
|-------------|-----------------------------------------------------------------------------------------------------------------------|-----|
| Figure S70. | $^1\text{H}$ - $^1\text{H}$ NMR spectrum of compound <b>14</b> in $\text{D}_2\text{O}$ (500 MHz).                     | 91  |
| Figure S71. | HSQC spectrum of compound <b>14</b> in $\text{D}_2\text{O}$ (500 MHz).                                                | 91  |
| Figure S72. | HMBC spectrum of compound <b>14</b> in $\text{D}_2\text{O}$ (500 MHz).                                                | 92  |
| Figure S73. | $^1\text{H}$ NMR spectrum of compound <b>15</b> in $\text{D}_2\text{O}$ (500 MHz).                                    | 93  |
| Figure S74. | $^{13}\text{C}$ NMR spectrum of compound <b>15</b> in $\text{D}_2\text{O}$ (125 MHz).                                 | 94  |
| Figure S75. | $^1\text{H}$ - $^1\text{H}$ COSY spectrum of compound <b>15</b> in $\text{D}_2\text{O}$ (500 MHz).                    | 94  |
| Figure S76. | HSQC spectrum of compound <b>15</b> in $\text{D}_2\text{O}$ (500 MHz).                                                | 95  |
| Figure S77. | HMBC spectrum of compound <b>15</b> in $\text{D}_2\text{O}$ (500 MHz).                                                | 95  |
| Figure S78. | $^1\text{H}$ NMR spectrum of compound <b>16</b> in $\text{D}_2\text{O}$ 0.5% TFA- <i>d</i> (500 MHz).                 | 97  |
| Figure S79. | $^{13}\text{C}$ NMR spectrum of compound <b>16</b> in $\text{D}_2\text{O}$ 0.5% TFA- <i>d</i> (125 MHz).              | 97  |
| Figure S80. | $^1\text{H}$ - $^1\text{H}$ COSY spectrum of compound <b>16</b> in $\text{D}_2\text{O}$ 0.5% TFA- <i>d</i> (500 MHz). | 98  |
| Figure S81. | HSQC spectrum of compound <b>16</b> in $\text{D}_2\text{O}$ 0.5% TFA- <i>d</i> (500 MHz).                             | 98  |
| Figure S82. | HMBC spectrum of compound <b>16</b> in $\text{D}_2\text{O}$ 0.5% TFA- <i>d</i> (500 MHz).                             | 99  |
| Figure S83. | $^1\text{H}$ NMR spectrum of compound <b>17</b> in $\text{D}_2\text{O}$ 0.5% TFA- <i>d</i> (500 MHz).                 | 100 |
| Figure S84. | $^{13}\text{C}$ NMR spectrum of compound <b>17</b> in $\text{D}_2\text{O}$ 0.5% TFA- <i>d</i> (125 MHz).              | 100 |
| Figure S85. | $^1\text{H}$ - $^1\text{H}$ COSY spectrum of compound <b>17</b> in $\text{D}_2\text{O}$ 0.5% TFA- <i>d</i> (500 MHz). | 101 |
| Figure S86. | HSQC spectrum of compound <b>17</b> in $\text{D}_2\text{O}$ 0.5% TFA- <i>d</i> (500 MHz).                             | 101 |
| Figure S87. | HMBC spectrum of compound <b>17</b> in $\text{D}_2\text{O}$ 0.5% TFA- <i>d</i> (500 MHz).                             | 102 |
| Figure S88. | $^1\text{H}$ NMR spectrum of compound <b>18</b> in $\text{DMSO-}d_6$ (500 MHz).                                       | 103 |
| Figure S89. | $^{13}\text{C}$ NMR spectrum of compound <b>18</b> in $\text{DMSO-}d_6$ (125 MHz).                                    | 103 |
| Figure S90. | $^1\text{H}$ - $^1\text{H}$ COSY spectrum of compound <b>18</b> in $\text{DMSO-}d_6$ (500 MHz).                       | 104 |
| Figure S91. | HSQC spectrum of compound <b>18</b> in $\text{DMSO-}d_6$ (500 MHz).                                                   | 104 |
| Figure S92. | HMBC spectrum of compound <b>18</b> in $\text{DMSO-}d_6$ (500 MHz).                                                   | 105 |
| Figure S93. | ROESY spectrum of compound <b>18</b> in $\text{DMSO-}d_6$ (500 MHz).                                                  | 105 |
|             | <u><math>^1\text{H}</math> NMR spectra of previously isolated diketopiperazines</u>                                   | 106 |
| Figure S94. | $^1\text{H}$ NMR spectrum of compound <b>7</b> in $\text{DMSO-}d_6$ (500 MHz).                                        | 106 |
| Figure S95. | $^1\text{H}$ NMR spectrum of compound <b>8</b> in $\text{CD}_3\text{OD}$ (500 MHz).                                   | 106 |
| Figure S96. | $^1\text{H}$ NMR spectrum of compound <b>11</b> in $\text{D}_2\text{O}$ (500 MHz).                                    | 107 |
| Figure S97. | $^1\text{H}$ NMR spectrum of compound <b>12</b> in $\text{D}_2\text{O}$ 0.5% TFA- <i>d</i> (500 MHz).                 | 107 |
| REFERENCES  |                                                                                                                       | 108 |

## SUPPLEMENTARY TABLES

**Table S1.** Bioinformatics analysis of the *ank* gene cluster from *A. thermomutatus* using NCBI BlastP search

| Protein                  | Size (aa) | Proposed function                             | Homologs (ident/coverage)    | Strains                                |
|--------------------------|-----------|-----------------------------------------------|------------------------------|----------------------------------------|
| AnkA<br>(XP_026617165.1) | 518       | hypothetical protein                          | no hits                      | no hits                                |
| AnkB<br>(XP_026617163.1) | 524       | cytochrome P450                               | KAG9240506.1<br>(60%/ 90%)   | <i>Calycina marina</i>                 |
| AnkC<br>(XP_026617167.1) | 587       | FAD-dependent monooxygenase                   | P0DUL5.1<br>(41%/89%)        | <i>Aspergillus hancockii</i>           |
| AnkD<br>(XP_026617166.1) | 563       | pyridoxal-phosphate dependent enzyme          | KAF7618911.1<br>(50%/93%)    | <i>Aspergillus flavus</i><br>NRRL3357  |
| AnkE<br>(XP_026617162.1) | 604       | NRPS independent siderophore synthetase (NIS) | CDM31866.1<br>(48%/93%)      | <i>Penicillium roqueforti</i><br>FM164 |
| AnkF<br>(XP_026617168.1) | 239       | O-methyltransferase                           | XP_015700694.1<br>(41%/100%) | <i>Paracoccidioides lutzii</i> Pb01    |
| AnkG<br>(XP_026617169.1) | 480       | ATP-grasp protein                             | KAF7349305.1<br>(35%/99%)    | <i>Mycena sanguinolenta</i>            |

**Table S2.** Bioinformatics analysis of the *ava* gene cluster from *A. versicolor* dI-29 using NCBI BlastP search

| Protein | Size (aa) | Proposed function                                 | Homologs (ident/coverage) | Strains                                     |
|---------|-----------|---------------------------------------------------|---------------------------|---------------------------------------------|
| AvaA    | 541       | hypothetical protein                              | no hits                   | no hits                                     |
| AvaB    | 709       | FAD-dependent monooxygenase                       | TVY66699.1 (28%/98%)      | <i>Fusarium oxysporum</i> f. sp. cubense    |
| AvaC    | 299       | kynurenine formamidase                            | A5DNX8.2 (27%/90%)        | <i>Meyerozyma guilliermondii</i> ATCC 6260  |
| AvaD    | 290       | GNAT family N-acetyltransferase                   | MBE0409255.1 (38%/85%)    | <i>Anaerolineales bacterium</i>             |
| AvaE    | 336       | beta-lactamase                                    | KAH6869491.1 (33%/83%)    | <i>Thelonectria olida</i>                   |
| AvaF    | 537       | cytochrome P450                                   | KAH6680460.1 (34%/87%)    | <i>Halenospora varia</i>                    |
| AvaG    | 319       | lysophospholipase catalytic domain family protein | TPR05408.1 (26%/97%)      | <i>Aspergillus niger</i>                    |
| AvaH    | 492       | cytochrome P450                                   | KAF2091838.1 (31%/70%)    | <i>Saccharata proteae</i> CBS 121410        |
| AvaI    | 437       | cytochrome P450                                   | KAH8801390.1 (28%/84%)    | <i>Xylogone</i> sp. PMI_703                 |
| AvaJ    | 507       | Proton-coupled folate transporter                 | Q6DCX5.1 (21%/71%)        | <i>Xenopus laevis</i>                       |
| AvaK    | 450       | MFS efflux pump                                   | C8V3Y8.1 (29%/84%)        | <i>Aspergillus nidulans</i>                 |
| AvaL    | 561       | cytochrome P450                                   | KAF8155335.1 (32%/83%)    | <i>Mycena galopus</i> ATCC 62051            |
| AvaM    | 255       | NAD-dependent epimerase/dehydratase               | TQW01081.1 (45%/92%)      | <i>Cordyceps javanica</i>                   |
| AvaN    | 362       | cytochrome P450                                   | XP_033685598.1 (32%/90%)  | <i>Trematosphaeria pertusa</i>              |
| AvaO    | 338       | dioxygenase                                       | XP_025392866.1 (64%/100%) | <i>Aspergillus eucalypticola</i> CBS 122712 |
| AvaP    | 453       | glycosyltransferase                               | KAE9372740.1 (39%/97%)    | <i>Chalara longipes</i> BDJ                 |
| AvaQ    | 1542      | ABC efflux transporter                            | P38735.1 (34%/73%)        | <i>Saccharomyces cerevisiae</i> S288C       |

**Table S3.** Plasmids used in this study

| Plasmid | Vector | Genes                                           |
|---------|--------|-------------------------------------------------|
| p3001   | pYTU   | n/a                                             |
| p3002   | pYTR   | n/a                                             |
| p3003   | pYTP   | n/a                                             |
| p3004   | pYTR   | gpdAp-AnkD; POgpdAp-AnkA                        |
| p3005   | pYTU   | gpdAp-AnkE; POgpdAp-AnkB                        |
| p3006   | pYTP   | gpdAp-AnkC; POgpdAp-AnkF                        |
| p3007   | pYTR   | POgpdAp-AnkA                                    |
| p3008   | pYTU   | POgpdAp-AnkB                                    |
| p3009   | pYTP   | gpdAp-AnkC                                      |
| p3010   | pYTU   | gpdAp-AnkE; POgpdAp-AnkB; PEgpdAp-AnkG          |
| p3011   | pYTP   | gpdAp-AnkE; POgpdAp-AnkB; PEgpdAp-AnkG(spliced) |
| p3012   | pYTU   | gpdAp-PthA                                      |
| p3013   | pYTU   | gpdAp-AteA                                      |
| p3014   | pYTU   | gpdAp-AmaA                                      |
| p3015   | pYTR   | gpdAp-AvaA                                      |
| p3016   | pYTU   | gpdAp-AnoA                                      |
| p3017   | pYTU   | gpdAp-EshA                                      |
| p3018   | pXW55  | n/a                                             |
| p3019   | pXW55  | ADH2p-AmaA-ADH2t                                |
| p3020   | pXW55  | ADH2p- <i>N</i> -his-AvaA-ADH2t                 |
| p3021   | pXW55  | ADH2p- <i>N</i> -his-AvaA(E432A)-ADH2t          |
| p3022   | pXW55  | ADH2p- <i>N</i> -his-AvaA(Y515A)-ADH2t          |
| p3023   | pXW55  | ADH2p- <i>N</i> -his-AvaA(Y515F)-ADH2t          |
| p3024   | pXW55  | ADH2p- <i>N</i> -his-AvaA(C193A)-ADH2t          |
| p3025   | pXW55  | ADH2p- <i>N</i> -his-AvaA(C193S)-ADH2t          |
| p3026   | pXW55  | ADH2p- <i>N</i> -his-AvaA(C193T)-ADH2t          |
| p3027   | pXW55  | ADH2p- <i>N</i> -his-AvaA(D428A)-ADH2t          |
| p3028   | pXW55  | ADH2p- <i>N</i> -his-AvaA(D429A)-ADH2t          |
| p3029   | pXW55  | ADH2p- <i>N</i> -his-AvaA(Y392A)-ADH2t          |
| p3030   | pXW55  | ADH2p- <i>N</i> -his-AvaA(Y392F)-ADH2t          |
| p3031   | pET28a | n/a                                             |
| p3032   | pET28a | T7p- <i>N</i> -his-AnkD-T7t                     |
| p3033   | pET28a | T7p- <i>N</i> -his-AvaA-T7t                     |
| p3034   | pET28a | T7p-TrpRS- <i>C</i> -his-T7t                    |
| p3035   | pET28a | T7p-ArgRS- <i>C</i> -his-T7t                    |
| p3036   | pYTU   | coxAp-AvaB                                      |
| p3037   | pYTU   | coxAp-AvaB; PEgpdAp-AvaC                        |
| p3038   | pYTP   | POgpdA-AvaD                                     |

**Table S4.** cDNA sequences of *ankD* and *ankG* and gDNA sequences of *pthA*, *ateA*, *amaA*, *anoA*, *eshA*, and *avaA-D*.

|             |                                                                                                                                                                                                                                                                                                                                                                                                                                                                                                                                                                                                                                                                                                                                                                                                                                                                                                                                                                                                                                                                                                                                                                                                                                                                                                                                                                                                                                                                                                                                                                                                                                                                                                                                                                                                                                                                                                                           |
|-------------|---------------------------------------------------------------------------------------------------------------------------------------------------------------------------------------------------------------------------------------------------------------------------------------------------------------------------------------------------------------------------------------------------------------------------------------------------------------------------------------------------------------------------------------------------------------------------------------------------------------------------------------------------------------------------------------------------------------------------------------------------------------------------------------------------------------------------------------------------------------------------------------------------------------------------------------------------------------------------------------------------------------------------------------------------------------------------------------------------------------------------------------------------------------------------------------------------------------------------------------------------------------------------------------------------------------------------------------------------------------------------------------------------------------------------------------------------------------------------------------------------------------------------------------------------------------------------------------------------------------------------------------------------------------------------------------------------------------------------------------------------------------------------------------------------------------------------------------------------------------------------------------------------------------------------|
| <i>ankD</i> | <p>ATGGGTGAACTGGGCCCTGCATCAGCTCAACATGGAAGTGACAGTATTCCTTCTCTGGCT<br/> CTTACACGCAGCCGCTCGGAGCTCCTCAACCTCCAAACGAACCTCATGCTATAAGCGTCTC<br/> CTTGCCACCTGGGAGGCTGTGACTGCCGTAATGGCGGGCGCAGACTGGGCTATATGCCA<br/> GCTACAAACCAGCTATCCTAGATTTGATATTCATAAATGTGTAAGAGAATTGCACGATGCC<br/> GTTCTGGCGAGATTCAAGCACCCGGCGCACACGGTGTGCCGAGCGTTTCCATCTCCTGAAG<br/> CTGCTGAGCGTTTTGTCTCAAGACTACAGAGAGAAGATCCCATATTATCTGTGCACACGGC<br/> GCGGTTCCATCTGCCTCATGATGCGGTTCCAGAGCTGGCAAATGGGCAGCGTTCTCAGTC<br/> GTATTGTTAATGAGAGTCTCGAAGAGGTGGCGTTTCGAGTTCTGGGAATGGTTTGGGGATG<br/> GAATCTCCAGTAGACATGCGGAGTTTTGTCTAACTCAATTCTCCTTCTGAATACTGGTTTCG<br/> GATCAGCCTGAATATCAGACTGTGGCCAAAGATTCCCATGATCTGAGTGCATGAACCTTC<br/> CAGAGTGGATTGACTCCTCTACCAAAGACAAAATGGATATCAAGTCTCGGCTTGCCAGCTC<br/> AGCAACATCAGCAGATCCAGCCTTGAAGCCCATGGGGAATGATGATGTAATCCTCTATGC<br/> CACTGGAATGGCTGCAATCAGCGCCATTGCCCGCGCGCTCGCTCGGACATCAGACGACTCT<br/> GGCGCTGTGGTGTACGGATGGCCGACTCCGGCACCCCTCATTGCGTGCAAGGCTGTGGAT<br/> TCAAGCGCTACACCATGTACGGTCACGGCTCGAAGGCGGATCTCGATTGCTCGAGACCTT<br/> GCTGGTTTCAGAACTCGATTCACGGTGTGTTCTGCGAGATCACGTCCAATCCTCAGCTG<br/> TCCACGCCGATCTGCATCGCATCCGAGATCTCGCCGACCGGTTTGGCTTCATCGTCGTGT<br/> GTGACGATACACTCGGCACATCCGTCAACGTGGATATCCTGCCATATGTCGATGTCATCAT<br/> CACCAGCTTGACCAAGATCTTCAGCGGTGCAGGCAATGTCATGGGAGGAAGCCTCATGAT<br/> TAACCCCAACTCTGGCCACTACAGTACTCTCCGCGCCCTTCTGACAACAACCTACGAGGAC<br/> CTTTACTTCCCCCTCGACGCAAAGACAATTGCGCGCAACTCCTCCGACTTCGCAGCCCGCG<br/> TCCACAAATGCAACAAGAGCGCTCTGCAGATCGCAAATTTGCTCAACTCGCATGCATCCGT<br/> CGAATCCGTCAACTATCCCACCATGGTCCCGACTGCACCTCTATACGAGCGCTACCGCCGC<br/> CCCGACGGCGGATATGGATTCTCCTCAGCGTCATCTTCCGCGAGCCCAGAGCGCCGTGC<br/> TCTTCTACGACAAGCTGGATGTGTGGAAGGGGCCACTGTGCGCACCAATTTCTCGATTTT<br/> CATCCCGTATTCGGCGCTGGCGCATGCGAAGGAGCAGGACTGGGCGGCGTGCATGGGGT<br/> CCCGAAGCATATTGTGCGTCTGAGCGTTGGGTTGGAGGATTATGGCGATTTGTCTGAGCGG<br/> GTGAACCGGGCATTGCGGGAGGTGGAAGTGAAGAGAGAAGATGGGATAG</p> |
| <i>ankG</i> | <p>ATGTATCAAATTTCTCTAAAGGGGACGAAGAGCGCTGCAGAACCCACCTCTTCAACCGAC<br/> GCATCTCACGACGACCGTCAAGTAGAGCGCGATTTCATACGACACCGCGATGCTGCGCTTC<br/> ATCAGCGACATGGAACGTCTCTCAATGTACGCGGAGAAGACGTCACCATAACCCATTCTC<br/> ATGCCGAGAAGCTTCTTGGAGACCTGAAGAATTTCCAAGATCTGCTATTTGTGTGAT<br/> CAAACATCTTGGATCGATGTTGGGAGGACAGGGAAGCCGACTTTCCCGTTCGCATGCCAT<br/> TGGAACCTCACGAGGAGCGTATTGAAGCATTACAATGAGCGCCCGCTACACTGGAGGC<br/> CGGACATGCTCCTCCCAGCAGCCGGCGATCCAAACACCAACCTACCTTTCAAATTTGCGA<br/> GATCAACGCTCGTTCCCCCTTCAACTCAATGATTAAGAGCATCTGTATGTTTCAGGCAGCG<br/> GCCGCAAGCAAAAACAGCCCTCCCCGACGGGTTAGAACTCGCTTCGACTGCGGATAGCCTG<br/> GTGGATAGTCTGGTCTCGCTGTTCAATCCGGACCTCCCTCTTCATGTTATTTGGCATGAGGG<br/> TATCACTGACCCCATCGATGCGTTCAGTTCTTCTACAAAAAGCGAACAGGCAAGATACCG<br/> CGAGTAATTCGCGCGACAGACCTGCGTCTCGCGCCGATTCTCATCCCCGACGGGTGCGA<br/> TTCTGTGCTGCGTTGCCCTCCGCGGTCGCGCAGACCATTCTAACGGCCAGGCAATTGTATC<br/> CGAGACAGGCGAACCCCTGGAACGTATCTACCAGGTGCGACTCCAGATGTCCCATCGGGA<br/> TTACAGTGAGCTCTTTCGGAAGTGCTGCAGCAGCTCGCCGTGGACGGAATCTGCGACCTA<br/> CGAACATCTTCTGGTCAGCGATAAACGCATGCTCGGCGTAATCTGGCAAGAGCTGGAC<br/> TCTCTCGTGACAAGCACCACGTCCTCACGGCTGAGCAGGCCGAGATCCTCCGACAGGGC<br/> ATCGTACATACCATTTTGCCCGGCTCCGAGGATATGGAACGCCTCTTGCGGCAGACTCGCG<br/> AGGGCTCCGTATCCAAGGATAGCTATCTTCTCAAACCTGCCCGTGGACACCGGGGAATGG<br/> GAATATTGCTTGGGAAAGACTTGGGGCAGGAGGAGTTTGGGGTCTCCTCGAGGAGCTGG<br/> CGGACCCGTTACTGCCTGCTGACAGGAGATATGTTGTGCAGCCTTTTATTGAGCAGGCACT<br/> ATTCCGTTTGGAGGCTGTATGATGATAGCGAGCCGCAACAATGCCAGATGACGGGGACATA</p>                                                                                                                                                                                                                                                                                                                                                                                                              |



|             |                                                                                                                                                                                                                                                                                                                                                                                                                                                                                                                                                                                                                                                                                                                                                                                                                                                                                                                                                                                                                                                                                                                                                                                                                                                                                                                                                                                                                                                                                                                                                                                                                                                                                                                                                                                                |
|-------------|------------------------------------------------------------------------------------------------------------------------------------------------------------------------------------------------------------------------------------------------------------------------------------------------------------------------------------------------------------------------------------------------------------------------------------------------------------------------------------------------------------------------------------------------------------------------------------------------------------------------------------------------------------------------------------------------------------------------------------------------------------------------------------------------------------------------------------------------------------------------------------------------------------------------------------------------------------------------------------------------------------------------------------------------------------------------------------------------------------------------------------------------------------------------------------------------------------------------------------------------------------------------------------------------------------------------------------------------------------------------------------------------------------------------------------------------------------------------------------------------------------------------------------------------------------------------------------------------------------------------------------------------------------------------------------------------------------------------------------------------------------------------------------------------|
|             | TCATGCCATTGGTGGGTGCTTTGCTGGGTTGGGCGTCTGGAGAGCTGATAGCGAGAGAATT<br>TGCTCTCGATTCCACGGTGCCTTTAGTATTCCAGCGATTGTTCCCCGTTAG                                                                                                                                                                                                                                                                                                                                                                                                                                                                                                                                                                                                                                                                                                                                                                                                                                                                                                                                                                                                                                                                                                                                                                                                                                                                                                                                                                                                                                                                                                                                                                                                                                                                           |
| <i>pthA</i> | ATGAGTACACTGTATCTGCTTGCGAATCTCCGGAATCGACCCGACGGTCGACACAGCATTG<br>ATTTTGGCAGTCTGTCCGCACGCGAGTCGGACCCGGTGAAGATGCCTCATGAAATCACAG<br>GGTTATTCAGTTCAGATTACTGTTTCATCAACGTCAACAACCCTTGAAGCAGAAGAGAGTGA<br>AGCGTATTCGAAAAGCGCTATCCAGGAATAAGAGAGCGGCTGGGATTCTGGAACATTTCT<br>GAATGGGGAACAAGCGGCGGCGCATCCGTCGGTCTGTCTGCAAGACAGAGCGCGCTTGGC<br>CCTATGCGAGGAGGCGATCCTAGTTGGGGCACCCCGTGGCACGGCGACAAGGGCCCCGAGA<br>GGGCATTGCCTCCTATGACAAAATGGAATTTCTTTTTCCGGGGAGCCGGCAACGGAAAGTCA<br>ATCCAGATGCTGCATGTGTCTGTCCAAGCCTGCAGCCGGGCGCAACTCTCTCGACAGTC<br>ACAGCGGCTCCGTTTCATGATAGCATCACGATCCTGTCAGGCATGTGTCTGTTTACGCGAAA<br>AATCTTAAATAGTACGACGACCAACGGACGTTTGGATGGCCAGAAGCTACGGCATATGCC<br>ACCCACTCTGTATGAAATGGAATGTATTGCTCGACTGTCAGCCATCATTGCTGATGTCACA<br>ACTTTAACGCAGTCCAACCTTTGGCGAGGATAAACCATCCTGCAGTCAACATTGTATTGGATC<br>TCCCAAGTTGGCACTACTATCAATTCATTGAGGACTGTATCAAGAGTGATACCTGCAGTCT<br>AGAGGAGGCTATTGATTGGACGGAGGCTATCAAACCTGCGCCGCCAGCAGCTGGCTAGCGT<br>GCTGAAGAAGGCAGTCTGGCAGGACTTGGACAACGTCAGGTTGCCACAAAATCGACCCT<br>CAAAGCCATCCAGATCTCACCCGAGTCTACCGTGGTGGACGAGCTCATTAAGGAGACCCT<br>GCAACGTGGGCATCAGCCGCGGTGGATGATATACTGCACGCCCTGAGCGGCACGCCGCA<br>TAGTCTCTGGCCGCAATTCTATTTCGCTGCTCCGGGACCCGCGACAAACCACACTCTATCAGA<br>GATCTCGTTTTCTCTTCTATGTATTTCAAGTGGTCCGCCCGGCGTTGCTCAAGGCCATCCC<br>ATGCCAGGAAGCGCCGAGCTCTAAAGCGCCCGCTTGCAGCAGCCCAACCTGCATCGCGG<br>GCAGAGGCAATGCCTTCCGCAACGCCACTCATCATCAGCCTTGATGACCGGGCGGAACG<br>CAAGATTTATTTCGAGGCTCACAGCCTCCTTCTCAGGCTGTCCAGGAGTTCGAACCAGCTT<br>GTCAATCCCACCCTCGTGCAACTGTACATGCCGCGCCGTGTCTACATCGATGGCAACAAG<br>ATGGTCAGCGCCTGTACTGGCATGATCCCAGTCTGTTCTGCCATTGCTCGAAGGCACGAA<br>AGAGCAGCAGAGGAGGGATGCGCGCAATCACGATCACCATCGGCGAGAACTCCAGCAAA<br>CCGACATTCTTACCGAGCTCTACGGTCGGGACTGTTCTGCCAACATCCAGGGTTGGTTCAA<br>AGAAGCTGGCCTTTGTTGA                              |
| <i>ateA</i> | ATGGATGTGCAATATGTACTCGCCGATCTCCAAACGGGACCCGGAATCTCAATCATCACAGT<br>CAAGTATTCATTTTCATGATATGGCCCCGTTCTATGTGGTGTCCATTGAGCGGCAGCATGG<br>ATTGTCTGGACTTGTGAGCATAGTTCCTGTTCCACGACGCCAACAATTCATGATGAA<br>AAGGATAAAAAAGCTTACCAGAAGGCCTGGTCAAGGGGCAGAAGATTTGCTGCATTGTT<br>GAAAACCTTGCTTAATGGGGGGAAAAATGGCTACGAAAACATCATGTTTCATTGCAGCAGACA<br>CCATACTTGCAACTACGCGATGAAGCACTTATTGTTGGGTACCCCTTGGCACTCCTACAC<br>GGACAAGGGAGGGTATTTCTTCCCTTCCACAACATGGAATTCATTTTCTGGAGCGAAACC<br>AGTTGTTTCATCACAGATGCTGCATATAACATGCCAGGTCTTCGGTCAGAGGAAAGTCTC<br>TTTGACAAAAATGGCGGAGCACTGTATGATAGCGTCACAGTATTGACCGGCATGTGCTTAT<br>TACTCGCAAAATACTGGACGAAAGTGTGCTGATGGTTTCTGGACACCCGGAAGCTGTT<br>GGACATGCAGCTGACTCTATATGAAGTGGAGCGCATCGCCGGATTGTCGTCGGCTATCGCA<br>GATATAGCAGCTCTCGTCTTGTCCAGATACGATGGGAAGTGCCACAAGCCGGTTAATATCA<br>TACTGGATCTTCCAACCTGGCATTACTACGAGCGTTGAGGATCAACTCCAACATAGAGG<br>CTATAAGCCATGCGAGGTGATGGATTGGATTGAAGCAATTAATCTCTCCGCACTCAGCAGTTA<br>GCAGGTTTGCTTAAGAGCGCAGTCTGCATGAGCTTGATAGGCGTGGTGTCTCAAGCAGTC<br>AACGTCCTATGATATCCAAATTTCTCCGGGTTACGCTTGGTCGATGACGCCTTCCGAGA<br>GACTCTCAAATACGAGAACCCTACCATGCCTTGATAAATATCCTTGAGGCGCTTAGCGGGAGC<br>GAAGATGGCTCGTGGCAGCAATTCTACTCGCTTCTTCCCGAACGCGATAGGCCTCAGTCTA<br>TTAAGGATCTGAGCTATCTTCTACATTTTTGAGGTTGTTTCGTCCTGCTGTGTTGGCTGGG<br>ATTCAATCCGGGAACCAGCAAACACCGACACAATCAGCCGATATGGATTCCACAGTCAGT<br>CACAGGCAACAACAACCTGCTTCCCTCCCGCAGCTATACGAGCAAGCAGAATCAAATGCC<br>CGTCCATTGGTCATCAGCGTTGATGATCCTTCCGGAGAGAAAATATATTCAAAGCCATA<br>GCTTCTTCTTAGGCTTCTAAGAACCAATCTACCCAGCTGACCCTACGTTGGTCCAAGT<br>GTACACGACTCGTCGGGTTTTTTGTTGACGGGAACAGAAAAGGGGAGCGCCTGTACCGGAA<br>TGACCCAGCCAGTATGCCAGAGCTAAGTAATGGTAAGCTCTATGGTATGGGGGTGA<br>TGCTGGGTACAGCAAGTATGCCAGAGAACTCCAGCAAATGGACTTCATAGCAAAGCTGTA<br>TGGTGGCGAATGTGCAGCAAATATCCAGCGTTGGTTCGAAGGAGGTTGGCTTATGCTGA |

|             |                                                                                                                                                                                                                                                                                                                                                                                                                                                                                                                                                                                                                                                                                                                                                                                                                                                                                                                                                                                                                                                                                                                                                                                                                                                                                                                                                                                                                                                                                                                                                                                                                                                                                                                                                                                                                                                                                    |
|-------------|------------------------------------------------------------------------------------------------------------------------------------------------------------------------------------------------------------------------------------------------------------------------------------------------------------------------------------------------------------------------------------------------------------------------------------------------------------------------------------------------------------------------------------------------------------------------------------------------------------------------------------------------------------------------------------------------------------------------------------------------------------------------------------------------------------------------------------------------------------------------------------------------------------------------------------------------------------------------------------------------------------------------------------------------------------------------------------------------------------------------------------------------------------------------------------------------------------------------------------------------------------------------------------------------------------------------------------------------------------------------------------------------------------------------------------------------------------------------------------------------------------------------------------------------------------------------------------------------------------------------------------------------------------------------------------------------------------------------------------------------------------------------------------------------------------------------------------------------------------------------------------|
| <i>amaA</i> | <p>ATGGTTTCAATCTCCAAAAGCCTCGTGGCTGATATATGTGTGGGCTCATCACCGCCAACAG<br/> TCCGGTTCGTCACTCTGCTTGAAAATCATGATATCTCCAACACTACCTTCCCATCCTTATCA<br/> GGGGTCTTGGCTCAATATGGATCTTCGCTTCAGGGACCGGCTGGCTTGCAACATGTTGGTC<br/> TCGCCAAAGACCAAAAGTACCAGCACGCCTTGACCAAAGGGTTGAAAGCTGTAGAAAAAC<br/> TACAACATTTCTAGACGGCCCAGCACCAATGTCAGGAGACCCTGTCGTCCTTCGTTGTTT<br/> TTCGGCCAGATCCTCAACTCTTTTGGAAATAACCGATGAGACCATTACCAGCGGTCCCCA<br/> TGCGCTGGGGCTGCCCGAGAACGAGAGGGGATCACCTCCTTCCATCGAATGAAATCCAC<br/> CTCCCCAAACACGTGGGGTGTGTACAAGATGTCCATGAGACCTCCTCGCAGATGCTTCATC<br/> TTTCTTGTGACGGATTGAGGTCTGAGGATACCCTCTTTGACCGCTTTGGAAGATGGAGCCG<br/> GGATCATGTCACAATCGTTTCCGGGATGTGTCTTTTTTCGGACAAGATTATGAGAGACGCA<br/> GTCCAAGGGGATGGA AAACTGGATGTATCAAAGCTGTCTTCTCAGGAACCGACGCTGTAC<br/> GAGTTGAAAATCATTGCGCGGTCTGCTTTCGGCCATCGCAGACGTGGCCAGCCATATCTTGG<br/> GGAAGAACGGCGCTGCAAAGCCTATCCCCTGGA AATTGTTTTGGATGCTCCTAGCTGGC<br/> ACTACTCCAGGTGGTTCACGGAAACCTGGCTTCCGGACATTGCACGCCGGCAGAGGCTCT<br/> GGACTGGCTGCAGGCCGTGGAGCTTCGCTGCGAACAAGTA ACTACGGTTTTTGGAACTC<br/> CGTACGCCATGAGATGGGCTGAGAGGAGTCCCTGCGGGTTCTACCACATTCTGGCAGC<br/> CCC GGAGACGGCTGGAGTTGGCACCAGCATCAGACAGGCGCTGACCTCTGGCATGGTACC<br/> CGACATTGCTGATTGCATGGATGCTATCTGCGAGGTCGAGGGTGAGCGCTGGGCCATGTT<br/> TACTCTCTCATCCCCGAGAAAGATAGACCCTGTGATTTTAGGTCTTTGGGCAATCTGTTTTA<br/> CATATACGAAGTTGTTTCGTCGCCCTTGGCCGCGAAGAACGGCTCTACAGCTGCAGAGCTG<br/> GAAGTCTCTGGTCCGAATTCGGCTCTCGATGACAGCTCATCATCTGGACATTCCGACATCC<br/> TCGACAGTGC GTTGCATCTCAAGGCCAACGTGGAACGGCCTCTGATCATGAGCATCGATG<br/> ACAGGGCCGAGCGCAAAATCTACTCCAAGCCAGGCTTTCATCAAGAAGATTCGCAGAG<br/> CCCCACAGATCCCTTCACATCCCCTCTTGTGGAGTTGTACAGCGCACGACGTGTGTTTTATC<br/> AACGGCAACACGGGTGGCGACAGTCTGTACTGGAATGATTCGAGCCACACCCACTCCGC<br/> ATGAACACGACAGCGGGGAGCCCCGAGCTTGAAGCCTTCGGTGTATCAGGAACCTTTAT<br/> GGAAATGACTGTGCCAAAACCTCCAGAGGTGGTCTCGGAGGCCGGCGTCAATGTTTCA<br/> GGACATACGTAG</p> |
| <i>anoA</i> | <p>ATGATGGGTGCCGTACA ACTTCCC GTTGAGACCGAGGCGTGTCTTCACGATGACGCCGCA<br/> AGCCGACCGATCTCTGATTCAAACACCGTACGGGTAGCCGTCCTTAGACAACACCAGTATC<br/> ACTCTAGTGTGACATAACCACAGGCTGGATGATAACAGATTAATCCC GGCGTCTGTTGGAT<br/> ATTCTATCTTCGCGATATTGCAGATGAGGGAAAGAAACAATCCCCTAGCAAACAGCACG<br/> CCCGAGTAATACAAGCCTATTCGAAGATTCACTCTCTCCTATCCCCACCAAGAGAACCAGG<br/> CCCTATAGACTCAGAAACAAAGACTCGAGAGAAGAAAAGCTCGCCTGTCATCGTTCACGA<br/> TAAAAGGTGTGCTTTCATAGAGCGACTTGAGCCACCTCCAACTCCAAGGCGGATATAGT<br/> GAACACTGTATTGCCCCAAGTCAATCTGCGGACACCAGTCGGTCCCTCCTCTGGATCAATTC<br/> GTCAACTGCCGCTCATCGAATATCAAATAAATGACTTGAAGGACTCCGCGAATGGCCTTT<br/> GTCGCCCTATCACAATCAGTACAGGTATATGCCTGTTCTCATCTCGGCTCCTAGGATTCATC<br/> CCTACAAATGGACTATCCACTACCGATGGCGCTACAGAGACAGTCATCCCCCATTGCCTT<br/> ACAGTGC GGATGCAACTTTCTACGA ACTTGAACATGTGCACGGATGGCAATGACTATTG<br/> CAGGCCTTGCCGTTACCGCTGGCACAGGTGGCACAGCTGGTTCTCGGCCAATTGTTGTGAG<br/> GTTAGATGTGCCTTGTCTCCAGTATTACTGCTACCCATTGGAGCTTCTTCAGGCAGGACTG<br/> GTGAGCTGGAAGTACGTT CAGGAGTGTT CAGACTGGTTCGATCGCCGGCATCGGCAAGTC<br/> GCAGGCTTGCTGAAGGATACCATTACTCATGAAGTACTTCGACGGGGCGGTGATATTAG<br/> GTGGAAGTCACCGCTGGCACTATAGCCGCAACTCAGCTTTTGGCTCTCAGTGTTCGACC<br/> GAATGGAATTACCGAGCGTGGATGATTTCTATTTGTGCTGAAGTGGGTCCGTCCTATCA<br/> GGCGGCATGGCGAGAATTTCTGGATATTCTTGATGATTGTCAAAGGCCCAAAGATCTTCG<br/> AGTGTTCACACTAATGGCTTATGTCTTTGAGGTCATGTATCCCGCATTGCATCAGATAGCTA<br/> CCAAATCTCTACATGGGAATGGCGAGAAGAGTGGTCGCCCTCTACTGATTCAGGTAGACG<br/> ATATAGCCGAGTGGAGAATCTTTGACCACGCAGAAAAGCTCCTCAAGCGCTTCAAAGAGC<br/> GACAGCATGGTTTTTATCCCCTCCTGGTTGGCGTGTTCCTCACCACGAATCTTTACGAGT<br/> GAGGATCAAAGGCGCTCTACCCTGTTCTTCATGACCCTGGTTTTAAAGATTTTGCAA ACTC<br/> GCTCTCCCCTAGCAATAGTGAAGAAGGCTCATGCGTTGTGCGCCCGTTAGATATCATTGG<br/> TCAGATCTATGGAAGAGAGGTT CAGGATACACTTGGGCAACTAACAAGAAAGCACGGTTT<br/> ATCTGCTGCTGATGGACCCGAATCAGATTAG</p>                                          |

|             |                                                                                                                                                                                                                                                                                                                                                                                                                                                                                                                                                                                                                                                                                                                                                                                                                                                                                                                                                                                                                                                                                                                                                                                                                                                                                                                                                                                                                                                                                                                                                                                                                                                                                                                                                                                                                                                 |
|-------------|-------------------------------------------------------------------------------------------------------------------------------------------------------------------------------------------------------------------------------------------------------------------------------------------------------------------------------------------------------------------------------------------------------------------------------------------------------------------------------------------------------------------------------------------------------------------------------------------------------------------------------------------------------------------------------------------------------------------------------------------------------------------------------------------------------------------------------------------------------------------------------------------------------------------------------------------------------------------------------------------------------------------------------------------------------------------------------------------------------------------------------------------------------------------------------------------------------------------------------------------------------------------------------------------------------------------------------------------------------------------------------------------------------------------------------------------------------------------------------------------------------------------------------------------------------------------------------------------------------------------------------------------------------------------------------------------------------------------------------------------------------------------------------------------------------------------------------------------------|
| <i>eshA</i> | <p>ATGTCTATACCAACCGATATCGCCAACCTACTGATTGGAGAGGATGCAAAAACCTTTCAATTC<br/> ACTTTTGATAAAAATTCCTCTCCACAACGATGCCCATCACAGTGGCTCCAAATTTTATATGCTT<br/> TCCACAAAATCGTGCGCTGAGAGACCACGAAGAAAAGGAAGACGACCTCAAATACCTGTCT<br/> AAGGGCAGACAAGGTGCCATTAGGCTGAACCAGCTACTTAATGCTCCCCATCTCATAAAA<br/> GAAAGAGAAAAGCACAGCCCAAAATGAGGGAAAAGCTGTGATGCGGCTTGGGGAAACCGC<br/> TATGGTTATCGACGAAACATTCGATGCGCAGCCTATCCACAGCCACATCTGGAACCTCCTC<br/> ATGTCAATTGAATTCGCTTCCCGCAAGCAGATTTACATCTCTGCAATATCTACAAACTTC<br/> TTGGAAGGGTCTCGAATCCGGCGATAACCCTTACACCAAGGAGGGAAACACCAACCTTCGA<br/> GGAAGTATCCATCGTTTCTGGAGTTTGCCTCTTCAATGCAAGGCTTTTGGAAATGAGTACA<br/> ACGTGCCCAAAATCTGGTGGTGTGATGTTGATCTACTCAAGAGCTCAACCCCTACATACA<br/> ATGAACTGGACTATATTGCTCGCGCGTCAAGCGCCATAGCTGACGTGCTGCTATGAACAT<br/> CTTAAGAGCTTGCAGCAGGACTCTGGACAGCGACTTACAATAAAGCTTGATATTCCGAG<br/> CTGGCACTACTTCCATACAGTAGCCACAAAATTTGTGTCAAAGCAATGTTGAACTGAA<br/> GTATTGCAATGGATGGACGCGGTTGACCAACGACATGATCAGATCGGCCAACTTTCGTG<br/> GAAGCCATCAGATATGGGCTTGAGCAACGGGGGATTTCATGACAGCACCAGCTATGGTATT<br/> GGCATGACATCAAGGACAAATACAGCCGCTATTTTAATTCGAACGGCAATTGAACATGAA<br/> GAAGTTCCTTCAATTGGATGCCATCCTCGCTGCTTTGGACTCTGAAGAAGACGGGTGCTGGA<br/> AACGATTCTACGAGATGATCCCGGTCAAGGAACGACCCTCGAATCTGGACCAGCTCGGTT<br/> ATCTGTACTATGTATATGAGGCAATCAGGCCATCTCTCGCCGAGCGTCCAGCACCAGTACC<br/> TCTGGAATCTGACCAAAACCAAGAAAGCCAACCTTGTCCAAGAAGGCATTGAAGAAGCGAAA<br/> ACCTCGCCGCTTAATCATCAGTGTGATGACTCTGCGGAACGACGCATTTACTCTCGAGCT<br/> CAAAGGGTACTCAGCAAAATTCGACAGTGTAGCGAAAAGCCCGAGACTTACTTGGTAGAG<br/> TCATACGTTTGTAGGAGGTTCTTGGTCAATGGAACGAGGACAGAGCAGACTAGGTCCG<br/> TTAGATCCTCTACCCGATATTCCAGTCCGTAAGTTTCCACCATGAGCCTATGCTACCTCT<br/> CGATGTTGTGCGGCAGCTCTATGGTAATAAATCTGCTCTCAACTTGCAACGATGGCTTCAA<br/> GAAGCGGGACTCTCAGTTTAG</p>                                                                                      |
| <i>avaA</i> | <p>ATGACGGCTACCGTGCAACATACCGTCAAGACCGAGGTGTGTCTTCGCGGCGATGTCGCC<br/> AGCCAACCGATCTCTGATTCAAAGCCCCAACATGGGTAGCGGTCTTCAGCAGCACGAA<br/> TATCAGTCCAGTGTTACATAACCACAAGCTAGATGACAACAGATTGATCCCAGATGTCTTCG<br/> GATATTCTTACCTCCGAGATATCGCAGACCAGGGGAAGAAGCAATCCACCGGCAAACAGC<br/> ACGCCCAGGTGATACAGGCCTACTCGAAGATTACTCCCTCCTATCCCCGCCATGGAAATC<br/> AAGTTCGATAGACTCCAACACGAAGACCCGAGAGAACAAGGCTCGCCCCGTCATCCTTGA<br/> AGATAAACGCTGTGCCTTCATAGAGCGGCTGGAACCACCTCCAAACTCAAAGGCGGATAT<br/> CGTGAGCACTGTGTTTCGCCAGGTCAATTTGCAGACACCAACCGTCTCCGTTAGAGCAA<br/> TTCCTCAGCTGCCGCGCATCGAATATCAAAGCAAATGACTTAAAGAACGCTGCAGAGGGC<br/> GTTTCGCCGCCCCATCACAATCAGTACAGGCATCTGCCTGTTCTCATCTCGGCTGCTAGGAT<br/> TCATCCCTACAAATGGACTATCCGTTTCCCATGATGCTACAGAGACCGTGGTCCCGCCATT<br/> GCCTTACACTACGGTTGCGACTTTCTACGAACTCGAAACATGCACGCGGATGGCAATGACT<br/> ATTGCAGGCCTGGCCGTTACGGCCAGCACAGGGGGTACAGCTGGTTCGCGGCCATTGTC<br/> GTGAGACTAGATGTGCCAACTCCAGTACTACTGTTACCCGTTGGAGCTTCTCGAAGCAG<br/> GACTTGTGAGCTGGGAGTATGTAGAAGAGTGGTTCCGGCTAGTCGATCGTCGGCATCGAC<br/> AGGTCGCAACGTTGTTAAAAGACACCATTATCCACGAAGTACGTGCGCAACTGTGATG<br/> TCCAGGTAGATGTTACCTCGGGCACTATAGCCGAACCCAGCTTCTACGTCTCTGTGTCT<br/> CGGCCGAAGGAAGATACCGAGCGTGAACGATATGCTGTTTGTGCTATCGTGGATCGGTCC<br/> GTACCAAGCAGCGTGGCGAGAATTTCTCGCTATTGTCGACGACTGCCAAAGGCCCAAAGA<br/> TCTTCGACGCTTGCCTAATGGCATAATGCTTTGAAGTGATGTATCCGGCATTACAGCAG<br/> GCAACTACCAAAAACCAAACTCCACATGGGAAGGGCGAGGAGAGTAGTGGCCGCCCTCTA<br/> CTGATTCAGGTGGACGATATCGCCGAGTGGAGAATCTTTGACCGTGCAGAAATGCTGCTTA<br/> AGCGATTCAAACACCGACAGCATGGTCTTGATCCCTCCTCGTTGGCGTGTTCCTTACC<br/> ACGGATCTTTACGAGTGAGGATCAAGGGCGCTCGACACTGTTCTTTCATGACCCTGGTCTG<br/> AAAATTCGCAAACTCGCCCTCCCTCTAGTGGTGGTGTATAGCGAAGACCACTCATGTGTTG<br/> TGGGTCCATTGGATATCATTGGTCAGATCTATGGAGCGGAGGTTTCAGGACACACTTATGCG<br/> ATTGATAATCGAGCGCGGTTTATCTCCTGAGGATGAATTCGAATTAGACTAG</p> |
| <i>avaB</i> | <p>ATGCCGCGAGTGGTCATTGTTGGTCTGGTATGCAATATTCATATCGGGTTATCGATCTATT<br/> ATTGACGTTTTTTTTTTTATTACGGGCTATACGGGCTCATCGCAGCCAAAACCTATCTCCAAG<br/> TAACGGACCCTCGTTATCCAGCAACCAGCAATGCGAAAATACCGACGACGTCCCCCAAT</p>                                                                                                                                                                                                                                                                                                                                                                                                                                                                                                                                                                                                                                                                                                                                                                                                                                                                                                                                                                                                                                                                                                                                                                                                                                                                                                                                                                                                                                                                                                                                                                                                                                      |

|             |                                                                                                                                                                                                                                                                                                                                                                                                                                                                                                                                                                                                                                                                                                                                                                                                                                                                                                                                                                                                                                                                                                                                                                                                                                                                                                                                                                                                                                                                                                                                                                                                                                                                                                                                                                                                                                                                                                                                                                                                                                                                                                                                                                                                                                                                                                                                                                                                                                                               |
|-------------|---------------------------------------------------------------------------------------------------------------------------------------------------------------------------------------------------------------------------------------------------------------------------------------------------------------------------------------------------------------------------------------------------------------------------------------------------------------------------------------------------------------------------------------------------------------------------------------------------------------------------------------------------------------------------------------------------------------------------------------------------------------------------------------------------------------------------------------------------------------------------------------------------------------------------------------------------------------------------------------------------------------------------------------------------------------------------------------------------------------------------------------------------------------------------------------------------------------------------------------------------------------------------------------------------------------------------------------------------------------------------------------------------------------------------------------------------------------------------------------------------------------------------------------------------------------------------------------------------------------------------------------------------------------------------------------------------------------------------------------------------------------------------------------------------------------------------------------------------------------------------------------------------------------------------------------------------------------------------------------------------------------------------------------------------------------------------------------------------------------------------------------------------------------------------------------------------------------------------------------------------------------------------------------------------------------------------------------------------------------------------------------------------------------------------------------------------------------|
|             | <p>CCTTCCAGAGACCTAGAGATACCCGGTCAACACACGATGACACTGACCTTCTTTTACTGGA<br/> ATCCGGATCAAGCCTTGGGGGAACATGGGCGGAGGAGCGGCTTTACCCAAATCTACTTAG<br/> CCAAAACCTCCGAGGGTCTGTACGAGTTCAGTGACATGTCTCTGTTCGGAGGCCATGGATGG<br/> GGTTCGATGATGAAGGACAGGCAGATCGAGACACCCCGGTGGAGGATCGCTTCATCCCAGG<br/> CTGGAAGCTGAGTCGTTACCTCACAGCGTGGAGTCGCAAATGGAACCTGCCACAGTACAT<br/> GCGGTTCAATTGGCAGGTTAGTGACGATGGAGAATGCAAGACATATGAATCACGATCTAA<br/> CCGAAGAATGACAATAGGTGAAGAAGATCAGCCGCCTGCCTACGAAGGAATGGGAGTTG<br/> GGAATAGTCATTACCCGGATCAACCATCGCAGACACGACATACAACCTATTCTCTGTGACA<br/> AACTTATCCTGTCCCCGGACTGACATCGGTGCCGAATATATTGAACTTCTCGCCTGCAAG<br/> TGGCCGGCCATCTGCCCGGCCGAGAATGTCATCCACGCCAAAGAAGTCGGTCCGTGGTG<br/> CCGTGACAATCTGGGTTACCAGCCGATCCCAGGACAAGATGCCCATCCGAGTCCCACGAA<br/> GCCTAGTCGTGTGCCCGGCCGGTTCGAACTCTATGGTGGTGCAAAAATCTTCGTTTGATCTT<br/> GTCCACATGTTTGCAACTCTGACTTAAAGGACCCAGTTTCCACCTAAAAGGATTGGACG<br/> CGACTGATTCTATTGAGCCGGTACAGGTGCACTGGATTATACGCGATGGAGGATCTGGCCC<br/> GGCCTGGATGTCCCCGCCTCGTCCAATATGCCCAATGGCCAGAGTATCGCCAGTGACAA<br/> AGTGGCCAGTACGCGATTTGTAGGCGTCTAAGCCCCTGTACGCCATTGGTGCCGAAACGT<br/> CTGACACTCCGTCGCTCATCCAATTTCTGGGCTGGAAACTCGCAGTGGAGGGCTCGTGGC<br/> TTGCCCGGCTTCTTCATGGGAACCCTATAGGGCGATACTTTGTACGGAGATTCTGGAAAGC<br/> ACTTGACAAGTCGTGGGGAGATTTTCGTGGATACGACAGTGCCCAGCACGGCGGAAAGAT<br/> GGAGCATCTCCGTCCAACAAACAGGTACATTCCCTGGCTTATCTTTGATGAAATTGCCTGA<br/> CCCATCTAGTATTATTTACTGCGGTGCACCGCTGGGAATTGCCAACAGCGTGGCTTCTGG<br/> GACGCTGTTTCGTGCACCGAATGTGCACATTCACCGTTCTGCAATTGAGTCGGTCTCCGGGG<br/> ATGCATCTTCAAAGGAGTTATCATCGATCTAGCTGATGATACCACTCTCCCTCTGACTGA<br/> CCTTCTTATCCAAGCCACTGGATGGAAGCCCAATGTTTCTGTAGAATTCACTCTCCACCA<br/> CTAACCTGCAGCTGGGTCTCTCATGCCGAGTCCCGAGAGCTATCCTTACACCCACAAATA<br/> GCGCCCAAGATGTCAAGGTTGACCCGGAGATCAAAAAGCTCATTCACTACTGGGATGGTA<br/> TTGACTCAGTATCTGCGTCTCGCATCCGCCGCTCTTCGGGCCAACAGCAGCCCGCCGAA<br/> GGATGTGGTTGAAAGCACCACAGCCCCGACAGATGAATTTGAATTCAGTCCATATCGATT<br/> ATTCCGCCGCATGGTAGCTCCAGAGCTTGTGTAAGAAGGCGACCGGTCTTTTGTGGCTCTG<br/> GGCTTTGTCCTAACTGCCACCACGGCTGTTGTGGCAGAGGTTTCAGGCGCTGTGGGCTGCTG<br/> CTTTTTGACGGGTGGTCTAGATGATACCAGGACCCATGACGCCCTAAGCATCAACGCCAT<br/> GTCGCGAAGTGACGTTGATAGAGATGTCTCGGAGGATGTGGTCTGGGGAGGCTTGACTGG<br/> GGTTGGCCCTGGTGTGATACTCTCAATGTAGGTTTCATGCCCTACCTTATTTTCAGACATA<br/> CTGACACCACAGTACAATGACATGCTTCTCCGAGATCTGGGTCTCTCTCCGTACCGGATG<br/> GGTGGGGGCTTTATCAATGAGCTTACAAGTGTCTATACACCAAAAAGCATACCGTGGAAAT<br/> GTAGAAGAGTGGAAGGCTAAGCACGGTAGACCATAG</p> |
| <i>avaC</i> | <p>ATGTCTCAACAATATCCACAGACGAACGATGTCCCGTATCTATTCTAATACCTCGACTG<br/> CCTACCACACTGTCGACATTTGCAAGGTGAACACATCACTCAAAGATTTCAGTCCCCCGCTT<br/> TTGGTTAATGTAGGTAACGAGAACTTCCAACGAAGAACAGGCGTTAAATCATGCCAGC<br/> TACATTCACGGAGGCGGTTGGAGCGATCCGAACATCCAAGCCAACACTTTCAGCCAGATA<br/> CGCGACGAGCTGTTGAAAGAAAAAGATATCCTGGCTCACATTTCTGGCATGCCCAGTC<br/> AACTACCGTTTATCTGGAGATCCCTCGGAGGGCCGCAACGCGGATACCCAGACCATCTTG<br/> ACGATGTGAAGCGCGCTATTGGGTTCTGGATTCCCGATACGGATTCAAGACCGGTACAT<br/> TGTTGTAGGGCACAGTGCGGGCGCTACGCTGGCATTCAACTTGCCATGGAGCCTGAGACT<br/> TCGTCACTTCCGACTCCGAAGAAGCCGCTGGCGATTCTGGGGGCGAGTGGGATTTACGAC<br/> CTGAGGAGACTTCTGAACTCTATATGGCATGTGGTGAAGTATAGGGAGGAGTATGTGCAT<br/> ATGTTGGAAGGCGCTTTTGGGCCGGGGGATTTGCTTACGGGGAACAGAGTGAAGGTTCGT<br/> TGCAGCTCGGAATGGGATCTTGCATCTCTGCCAAGGCAACGAGTTATGGATCGTCGTGGT<br/> GCAATGCGCAATTGGCGATGCTGGTTTCTCTCCCGACGATGAGCTTGTTCGGTTGGAACA<br/> GTCTACGCAGTTTGAACCTGTTTTGGAATCTTCTTCCCCCTGGAGTGGTGCAGACCCGGT<br/> TTGACTTGGCTGGTTCGCATGATGATATTTGGAGAAAGCCCGAAGGTATAGTGCCTTAT<br/> TTCAGAAGCAGTCATGACGCTGTTAGAAAGACATAAATAG</p>                                                                                                                                                                                                                                                                                                                                                                                                                                                                                                                                                                                                                                                                                                                                                                                                                                                                                                                                                                                                                                                                                                                                                                                                                                                                                                                                                                                      |
| <i>avaD</i> | <p>ATGGCAGGCATTGATCTACAGTCACTGGGGATCAGTCTGCCTCCAGGCTACTCCCTCCAAA<br/> CCGCAGCAGCTCGGCCAGACATGTACGAGACCTTGTGTTGATCCCGAACATCCAATGAGCTC<br/> TCTCTGGCCCCAGTTCATTACTTCGACACCTGTGTCCGAAAAGTACTGGTCTCAATTGACA<br/> GACATACCGCTCTTCGCATCCTACCAGCTAATGATTCTCCACAGAGATGTGGAGAACAAC</p>                                                                                                                                                                                                                                                                                                                                                                                                                                                                                                                                                                                                                                                                                                                                                                                                                                                                                                                                                                                                                                                                                                                                                                                                                                                                                                                                                                                                                                                                                                                                                                                                                                                                                                                                                                                                                                                                                                                                                                                                                                                                                                                                                                                 |

|                                                                                                                                                                                                                                                                                                                                                                                                                                                                                                                                                                                                                                                                                             |
|---------------------------------------------------------------------------------------------------------------------------------------------------------------------------------------------------------------------------------------------------------------------------------------------------------------------------------------------------------------------------------------------------------------------------------------------------------------------------------------------------------------------------------------------------------------------------------------------------------------------------------------------------------------------------------------------|
| ACGAATCAGTGGTGGCTTGTGGAAATTCAGTTCGGTATATTGTCCACTCAATGACTTGCC<br>CGATGGTGGTTGGGAAGCTATCCTGCAGACGGGCATAGAGA ACTATCGTGCCGGCCATAA<br>ACAGCACCCCAATTTGCTGTCAGCGCTCGGTGTCACGGTGGCCTCTGCTCACCGGCAGCAG<br>GGGCTGGCTGATATTGTCATTCAA ACTCTGAGAGCGCTCGCCAATCAGGCCCACTTTGAAG<br>CCCTGGTCGTACCACTGCGTCCAACCAAGAAGAGCGAACACCCCATGGTTCCTTTGGAGG<br>AATACGTGCATTGGAACTTGATGAGCACGCACGTCCCGATGATCAGGTTTCATACGATCC<br>GTGGCTGCGGAAACACCTCAGCTATGGAGGCCAAATGGTTCGAATTGCTCCCCGCAGCAT<br>GACAATCGCGGCCACGCGGATCAATGGAAAGACTGGACTGGATGTGACCTGGCTGCCTT<br>GGCTGAGTCCGGCTCGGACACCTCCTCGAAGGGGCTTGTCGAGATGCCTATCCCCGTGCT<br>CTGGTACCTGTGCAATACGACCCCGTCTCGAAGGTTGCTTCGTATGTGGAGCCCAATGTTT<br>GGGTAGTTCATCCAATCCATTAG |
|---------------------------------------------------------------------------------------------------------------------------------------------------------------------------------------------------------------------------------------------------------------------------------------------------------------------------------------------------------------------------------------------------------------------------------------------------------------------------------------------------------------------------------------------------------------------------------------------------------------------------------------------------------------------------------------------|

**Table S5.** Primers used in this study

| Primer                       | Sequence (5'-3')                                                  |
|------------------------------|-------------------------------------------------------------------|
| A thermomutatus NRPS check R | ACTGGGGAAGTGGCGAAAG                                               |
| A thermomutatus NRPS F       | ATGACTGTGCCACCAATAAGC                                             |
| A thermomutatus PLP check F  | CGTTCTGGCGAGATTCAAGC                                              |
| A thermomutatus PLP check R  | GTGATCTCGCAGAACAGCAC                                              |
| A therm NRPS POgpdA F        | CCTTTTATCAATCGGGGACTTCGTCGTAGTTGACATCTTTGCTCCAGGAAT<br>ACATGTGAG  |
| POgpdA Atherm P450 R         | GGCCAGAAATGGCCCAGGTTGAGTTGAATTGTGCCATTTTTGCGATTGTT<br>TGAAGTGTTT  |
| Atherm P450 pYTU R           | CGGGGGATCCACTAGTTCTAGAGCGGCCCTTAATTAATCAGTCAGGAT<br>GCCACTACTC    |
| gpdA atherm NRPS R           | CGAACGAGGCTCGTTCGCTTATTGGTGGCACAGTCATTGTTTAGATGTGT<br>CTATGTGGCG  |
| gpdA atherm PLP R            | TTCCATGTTGAGCTGATGCAGGGCCAGTTCACCCATTGTTTAGATGTGTC<br>TATGTGGCG   |
| atherm PLP POgpdA F          | CATCAAAGTCTAACAGAGCCAGCAAAGTAATCCAACTTTGCTCCAGGA<br>ATACATGTGAG   |
| POgpdA atherm HP R           | TGCTGGAGGTCGGCAACTGGAATCCTGTCTTCCATTTTTGCGATTGTTTGA<br>AGTGTCTG   |
| atherm HP F                  | ATGGAAGACAGGATTCCAGTTGC                                           |
| atherm HP pYTR R             | CGAATTCCTGCAGCCCCGGGGGATCCTTAATTAACACAATATGTAECTATC<br>GCTTTGTGG  |
| gpdA atherm hydroxylase R    | TAATCAACACATCAACCGCAGACTCTTCTTGGTCATTGTTTAGATGTGTC<br>TATGTGGCG   |
| atherm hydroxylase F         | ATGACCAAGAAAGAGTCTGCG                                             |
| atherm hydroxylase POgpdA F  | GCTGGCGGTCCATCCTCAAGCAGTGTAAGTAAAATTCTTTGCTCCAGGAA<br>TACATGTGAG  |
| atherm hydroxylase R         | GAATTTTACTTACACTGCTTGAGGATGG                                      |
| POgpdA atherm MT R           | GTTTCATCGGGGAAGGGAATGATGCTTTCGTACATTTTTGCGATTGTTTGA<br>AGTGTCTG   |
| atherm MT F                  | ATGTACGAAAGCATCATTCCCTTC                                          |
| atherm MT pYTP R             | GCTTGATATCGAATTCCTGCAGCCCCGGGGGATCCTTAATTAAGGTTCTGC<br>AGCGCTCTTC |
| atherm PLP pYTR R            | TATCGAATTCCTGCAGCCCCGGGGGATCCTTAATTAAGTTTGGATTACTTTG<br>CTGGCTCTG |
| atherm PLP F3                | GGCACCAATTTCTCGATTTCCATC                                          |
| atherm PLP F4                | GGAGGTGGAAGTGAAGAGAGAAG                                           |
| atherm PLP F5                | TGCTGGTTTCAGAACTCGATTC                                            |
| atherm PLP R3                | CTATCCCATCTTCTCTCTCAGTTCC                                         |
| atherm HP R2                 | GTCCAGTTTTTCGACGGTGAG                                             |
| atherm hydroxylase R2        | CATCTTGAATCCCAGTTGCTTCC                                           |
| atherm MT R2                 | CAAGAGGACGTCGAGCTG                                                |
| atherm P450 R2               | CTCTCGAATGAAGGGGCTAGC                                             |

|                               |                                                                   |
|-------------------------------|-------------------------------------------------------------------|
| atherm nrps F2                | CCCTGTTTAATCGTCCGTCAG                                             |
| atherm NRPS F3                | CATGCGGAGATTGTCTTTGGTC                                            |
| atherm P450 R3                | AGATCCTGGCCGTTGTCTG                                               |
| atherm hydroxylase F2         | CTGTGTCTGCCTCACTTGTTATC                                           |
| atherm hydroxylase R3         | GTGCCACAGGTATTGAACCTG                                             |
| atherm P450 PEgpdA F          | CTCGTGACATCTTTTGACTTGAGTAGTGGCATCCTGACTGAGATTTCGTCCA<br>GGGCTTCCC |
| PEgpdA atherm g20 R           | CGCTCTTCGTGCGCTTTAGAGAAATTTGATACATGATTGCGGTTTACTAGA<br>AGTTGTTAG  |
| atherm g20 F                  | ATGTATCAAATTTCTCTAAAGGCGACGAAG                                    |
| atherm g20 pYTU R             | ATCCACTAGTTCTAGAGCGGCCGCCTTAATTAATAAAGATCACTACTCAC<br>ACCAACTCAC  |
| atherm hydroxylase<br>check F | AAGACTACAGAGACTGCTGAGG                                            |
| atherm hydroxylase<br>check R | TGCTTTTTTGGCCTCGAAAATCG                                           |
| atherm MT check F             | CCTTTGTCACTATTCTCAGGTCAG                                          |
| atherm hp check F             | ACCCTGTGAAGGGCATGC                                                |
| atherm hp check R             | AGATACACCTCGAGTAGATGAGG                                           |
| gpdA apimo HP_cdps F          | CTAACCATTACCCCGCCACATAGACACATCTAAACAATGGTTTCAATCTC<br>CAAAAGCCTC  |
| apimo hp_cdps pYTU R          | GGGGATCCACTAGTTCTAGAGCGGCCGCCTTAATTAAGAACGTTAATGTT<br>TCGGGAGAAC  |
| gpdA av hp_cdps F             | ACTAACCATTACCCCGCCACATAGACACATCTAAACAATGTCTATACCAA<br>CCGATATCGC  |
| av hp_cdps pYTU R             | GGATCCACTAGTTCTAGAGCGGCCGCCTTAATTAATGCCAGGTCTGATGT<br>TTGATTTCTC  |
| av HP F                       | ATGTCTATACCAACCGATATCGCC                                          |
| av HP F2                      | CCTTCGTGGAAGCCATCAGAG                                             |
| av HP R2                      | CGCAGCTGGATTTGTCCTTG                                              |
| av HP R                       | TGCCAGGTCTGATGTTTGTATTTCTC                                        |
| ADH2p apimo HP F              | ACAATCAACTATCAACTATTA ACTATATCGTAATACATGGTTTCAATCTCC<br>AAAAGCCTC |
| apimo HP xw55 R               | TGAAGGCATCGGTCCGCACAAATTTGTCATTTAAACTACGTATGTCCTGA<br>AACATTGACG  |
| apimo HP seq R                | AAGGCAGATGCCACGAAG                                                |
| gpdAp av in house HP F        | AAGCTTGACTAACCATTACCCCGCCACATAGACACATCTAAACAATGACG<br>GCTACCGTGC  |
| av in house HP term<br>pYTU R | ATCCACTAGTTCTAGAGCGGCCGCCTTAATTAAGGAAAGATTTCTGTATC<br>TACTCGGTTC  |
| gpdAp pthy HP F               | ACTAACCATTACCCCGCCACATAGACACATCTAAACAATGAGTACACTGT<br>ATCTGCTTGC  |
| pthy HP pYTU R                | CACTAGTTCTAGAGCGGCCGCCTTAATTAATTTTAGTGGTAGTTGTTTAGA<br>GGATCAACG  |
| gpdAp aspnom HP F             | CTTGACTAACCATTACCCCGCCACATAGACACATCTAAACAATGATGGGT<br>GCCGTACAAC  |
| aspnom HP pYTU R              | ATCCACTAGTTCTAGAGCGGCCGCCTTAATTAATCCTTGAAAGATTTTTAC<br>TACTGGCAG  |





|                         |                                                                  |
|-------------------------|------------------------------------------------------------------|
| trp tRNA R              | AACGGACAGGAATTGAACCTG                                            |
| m13 rev trp tRNA F      | CAGGAAACAGCTATGACGTCTAGCGCTTTACGGAAGACAATCGGTGGCTC<br>AATGGTAGAG |
| trp tRNA m13 fwd R      | GTAAAACGACGGCCAGTCAAGGCGATTAAGTTGGGTAACAACGGACAGG<br>AATTGAACCTG |
| m13 rev trp tRNA F      | CAGGAAACAGCTATGACGTCTAGCGCTTTACGGAAGACAATCGGTGGCTC<br>AATGGTAGAG |
| trp tRNA m13 fwd R      | GTAAAACGACGGCCAGTCAAGGCGATTAAGTTGGGTAACAACGGACAGG<br>AATTGAACCTG |
| atherm g20 spliced OH R | GTCCGGCCTCCAGTGTAGCGGGCGCTCATTGTAATGCTTCAATACGCTCT<br>CCTCGTGAGG |
| atherm g20 spliced F    | AGCATTACAATGAGCGCCCGCTAC                                         |
| gpdA pensub HP F        | CTAACCATTAACCCGCCACATAGACACATCTAAACAATGCTTGGTCCAAT<br>TTCGTTACAC |
| pensub HP pYTU R        | GGATCCACTAGTTCTAGAGCGGCCGCCTTAATTAACAAGCCTTCAGTGGA<br>AGAAGGAATG |
| av HP Y515A F           | CATTGGTCAGATCGCAGGAGCGGAGGTTC                                    |
| av HP Y515A R           | CTCCGCTCCTGCGATCTGACCAATG                                        |
| av HP E315A F           | CACCATTATCCACGCAGTACGTGACG                                       |
| av HP E315A R           | CGTCGACGTACTGCGTGGATAATGGTG                                      |
| av HP E432A             | GTGGACGATATCGCCGCATGGAGAATCTTTGAC                                |
| av HP E432A R           | GTCAAAGATTCTCCATGCGGCGATATCGTCCAC                                |
| av HP Y515F F           | CATTGGTCAGATCTTCGGAGCGGAGGTTC                                    |
| av HP Y515F R           | CTCCGCTCCGAAGATCTGACCAATG                                        |
| gpdA eupen HP F         | ACCATTACCCCGCCACATAGACACATCTAAACAATGTCTATACCAACCGA<br>TATCGCCAAC |
| eupen HP term pYTU R    | GGGATCCACTAGTTCTAGAGCGGCCGCCTTAATTAACAAAGTGCTGTTTG<br>ATATGCGCAG |
| avHP C193A F            | GTACAGGCATCGCCCTGTTCTC                                           |
| avHP C193A R            | GAGAACAGGGCGATGCCTGTAC                                           |
| avHP D428A F            | GATTCAGGTGGCCGATATCGC                                            |
| avHP D428A R            | GCGATATCGGCCACCTGAATC                                            |
| avHP D429A F            | CTGATTCAGGTGGACGCTATCGC                                          |
| avHP D429A R            | GCGATAGCGTCCACCTGAATCAG                                          |
| avHP C193S F            | GTACAGGCATCTCCCTGTTCTCATC                                        |
| avHP C193S R            | GATGAGAACAGGGAGATGCCTGTAC                                        |
| avHP C193T F            | GTACAGGCATCACCTGTTCTCATC                                         |
| avHP C193T R            | GATGAGAACAGGGTGTATGCCTGTAC                                       |

**Table S6.** AnkA homologs

| Strain                                       | AA size of homolog | % identity to AnkA | e-value   |
|----------------------------------------------|--------------------|--------------------|-----------|
| <i>Aspergillus udagawae</i> CBS 114217       | 523                | 83.779             | 0         |
| <i>Aspergillus siamensis</i> CBS 137452      | 523                | 84.895             | 0         |
| <i>Penicillium variable</i>                  | 515                | 73.552             | 0         |
| <i>Fusarium tricinctum</i> MPI-SDFR-AT-0068  | 524                | 42.857             | 7.40E-137 |
| <i>Astrocystis sublimbata</i> CBS 130006     | 501                | 40.076             | 1.49E-125 |
| <i>Xylaria curta</i> CBS 114988              | 501                | 40.571             | 4.94E-124 |
| <i>Aspergillus appendiculatus</i> CBS 374.75 | 501                | 41.078             | 6.90E-124 |
| <i>Xylaria berteri</i>                       | 501                | 39.619             | 6.40E-120 |
| <i>Hypoxylon argillaceum</i> CBS 527.63      | 500                | 38.783             | 6.69E-120 |
| <i>Aspergillus megasporus</i> DTO 048-I3     | 524                | 40.49              | 1.04E-119 |
| <i>Nemania diffusa</i> NC0034 v1.0           | 500                | 38.593             | 1.12E-119 |
| <i>Xylaria venustula</i> FL0490              | 498                | 39.313             | 2.88E-119 |
| <i>Xylogone</i> sp. PMI_703                  | 297                | 61.074             | 1.22E-118 |
| <i>Eurotium rubrum</i>                       | 501                | 40.338             | 4.31E-117 |
| <i>Aspergillus cumulatus</i> DTO 311-F5      | 501                | 40.49              | 6.64E-117 |
| <i>Aspergillus penicilloides</i> CBS 540.65  | 490                | 43.75              | 1.55E-116 |
| <i>Xylariaceae</i> sp. FL1272                | 501                | 38.692             | 6.82E-116 |
| <i>Aspergillus endophyticus</i> DTO 354-I2   | 501                | 41.055             | 3.75E-114 |
| <i>Aspergillus endophyticus</i> DTO 354-I2   | 501                | 37.121             | 2.67E-112 |
| <i>Poronia punctata</i> CBS 180.79           | 507                | 38.015             | 1.00E-110 |
| <i>Podosordaria jugoyasan</i> CBS 670.77     | 516                | 39.074             | 2.26E-110 |
| <i>Aspergillus teporis</i> DTO058-E5         | 485                | 39.279             | 3.47E-105 |
| <i>Atropellis piniphila</i> CBS 197.64       | 524                | 38.095             | 6.57E-99  |

|                                               |     |        |          |
|-----------------------------------------------|-----|--------|----------|
| <i>Alternaria carthami</i> BMP1963            | 519 | 35.019 | 1.06E-94 |
| <i>Nemania sp.</i> FL0916 v1.0                | 452 | 34.63  | 1.82E-94 |
| <i>Monascus ruber</i> NRRL 1597               | 584 | 59.211 | 4.85E-23 |
| <i>Monascus purpureus</i>                     | 589 | 60.526 | 3.50E-23 |
| <i>Aspergillus caperatus</i> DTO 337-E6       | 410 | 40.541 | 3.81E-81 |
| <i>Apiospora montagnei</i> NRRL 25634         | 543 | 32.299 | 4.23E-78 |
| <i>Aspergillus chevalieri</i> CBS 522.65      | 405 | 39.394 | 0.015    |
| <i>Aspergillus multiplicatus</i> CBS 646958   | 544 | 32.673 | 1.19E-70 |
| <i>Aspergillus carlsbadensis</i> CBS 123894   | 524 | 32.24  | 1.60E-69 |
| <i>Pseudogymnoascus sp.</i> VKM F-103         | 548 | 28     | 6.35E-66 |
| <i>Zalerion varium</i> MPI-CAGE-AT-0135       | 519 | 31.216 | 1.82E-65 |
| <i>Leptosphaeria microscopica</i> UNIPAMPA013 | 327 | 39.45  | 4.98E-65 |
| <i>Pseudogymnoascus verrucosus</i> UAMH 10579 | 548 | 27.826 | 8.70E-65 |
| <i>Arthroderma benhamiae</i> CBS 112371       | 509 | 33.69  | 3.54E-57 |
| <i>Trichophyton tonsurans</i> CBS 112818      | 471 | 32.8   | 8.43E-56 |
| <i>Trichophyton interdigitale</i> MR816       | 509 | 32.353 | 2.14E-54 |
| <i>Aspergillus egyptiacus</i> CBS 656.73      | 508 | 33.245 | 6.00E-53 |
| <i>Thelebolus microsporus</i> ATCC 90970      | 393 | 32.836 | 1.2E-52  |
| <i>Thelebolus globosus</i> UNIPAMPA015        | 393 | 32.587 | 1.83E-51 |
| <i>Trichophyton equinum</i> CBS 127.97        | 330 | 32.584 | 2.08E-51 |
| <i>Trichophyton verrucosum</i> HKI 0517       | 509 | 33.422 | 7.53E-51 |
| <i>Aspergillus spiritus</i> DTO 241-G7        | 305 | 32.031 | 1.42E-49 |
| <i>Endocarpon pusillum</i> Z07020             | 489 | 29.197 | 1.04E-48 |
| <i>Aspergillus versicolor</i>                 | 508 | 32.62  | 2.65E-48 |
| <i>Nannizzia gypsea</i> CBS 118893            | 509 | 31.818 | 2.89E-48 |
| <i>Aspergillus robustus</i> CBS 428.77        | 310 | 36.928 | 3.78E-48 |

|                                              |     |        |          |
|----------------------------------------------|-----|--------|----------|
| <i>Aspergillus terreus</i> NIH 2624          | 431 | 32.967 | 1.26E-47 |
| <i>Aspergillus shendawei</i> IBT 34197       | 400 | 32.817 | 1.96E-47 |
| <i>Aspergillus pseudofelis</i> IBT 34107     | 334 | 31.622 | 1.19E-46 |
| <i>Aspergillus parafelis</i> IBT 34187       | 402 | 31.635 | 5.93E-46 |
| <i>Antarctomyces</i> sp. UNIPAMPA016         | 387 | 33.036 | 2.03E-44 |
| <i>Cucurbitaria berberidis</i> CBS 394.84    | 387 | 31.549 | 6.57E-44 |
| <i>Thelebolus stercoreus</i>                 | 384 | 30.667 | 6.50E-43 |
| <i>Penicillium thymicola</i> DAOMC 180753    | 494 | 28.571 | 1.62E-40 |
| <i>Aspergillus insolitus</i> CBS 384.61      | 528 | 29.867 | 2.42E-39 |
| <i>Aspergillus pseudonomius</i> CBS 119388   | 528 | 29.459 | 4.25E-37 |
| <i>Aspergillus nomius</i> NRRL 13137         | 528 | 29.459 | 4.25E-37 |
| <i>Aspergillus versicolor</i> dI-29          | 532 | 27.604 | 8.21E-37 |
| <i>Byssochlamys spectabilis</i> No. 5        | 528 | 25.094 | 9.57E-35 |
| <i>Aspergillus affinis</i> CBS 129190        | 527 | 27.968 | 1.81E-34 |
| <i>Aspergillus sclerotiorum</i> CBS 549.65   | 436 | 27.331 | 2.15E-33 |
| <i>Aspergillus roseoglobulosus</i> CBS112800 | 427 | 25.278 | 1.85E-31 |
| <i>Aspergillus tamarii</i> CBS 117626        | 449 | 26.75  | 3.30E-31 |
| <i>Microcera lavarum</i>                     | 528 | 26.35  | 1.24E-30 |
| <i>Aspergillus nutans</i> CBS 121.56         | 465 | 23.333 | 1.39E-30 |
| <i>Rhizina undulata</i> CBS 300.56           | 497 | 23.475 | 3.46E-30 |
| <i>Lomentospora prolificans</i> JHH-5317     | 546 | 22.922 | 1.11E-29 |
| <i>Aspergillus nomius</i> IBT 12657          | 483 | 25.145 | 1.07E-28 |
| <i>Aspergillus pseudonomius</i> CBS 119388   | 483 | 25.723 | 1.14E-28 |
| <i>Neofusicoccum parvum</i> UCRNP2           | 519 | 26.05  | 2.58E-28 |
| <i>Tolypocladium paradoxum</i> NRBC 100945   | 496 | 26.269 | 3.05E-28 |
| <i>Gyromitra infula</i> GyriInfSpk-SM18      | 518 | 26.861 | 5.92E-28 |

|                                                |      |        |          |
|------------------------------------------------|------|--------|----------|
| <i>Geopyxis carbonaria</i> CBS 144460          | 497  | 27.393 | 6.47E-28 |
| <i>Tricharina praecox</i> CBS 144465           | 476  | 30.345 | 1.64E-27 |
| <i>Aspergillus undulatus</i> CBS 261.88        | 501  | 24.933 | 5.38E-27 |
| <i>Aspergillus siamensis</i> CBS 137452        | 492  | 23.16  | 1.34E-26 |
| <i>Aspergillus pseudofelis</i> IBT 34107       | 492  | 23.116 | 1.38E-25 |
| <i>Aspergillus appendiculatus</i> CBS 374.75   | 491  | 23.497 | 2.66E-25 |
| <i>Aspergillus neowarcupii</i> IBT 29024       | 1003 | 24.149 | 5.39E-25 |
| <i>Aspergillus brevistipitatus</i>             | 491  | 24.923 | 7.78E-25 |
| <i>Aspergillus avenaceus</i> IBT 18842         | 480  | 25.895 | 2.36E-23 |
| <i>Aspergillus parafelis</i> IBT 34187         | 492  | 22.613 | 6.27E-23 |
| <i>Penicillium thomii</i>                      | 498  | 24.747 | 2.42E-22 |
| <i>Aspergillus shendawei</i> IBT 34197         | 491  | 21.833 | 5.99E-22 |
| <i>Aspergillus waksmanii</i> IBT 31900         | 480  | 21.981 | 3.57E-21 |
| <i>Hirsutella minnesotensis</i> 3608           | 689  | 24.541 | 7.14E-21 |
| <i>Aspergillus transcarpathicus</i> CBS 423.68 | 490  | 24.069 | 7.73E-21 |
| <i>Pochonia chlamydosporia</i> 170             | 509  | 20.179 | 1.44E-20 |
| <i>Scedosporium apiospermum</i> IHEM 14462     | 499  | 22.684 | 2.60E-18 |
| <i>Lobaria pulmonaria</i>                      | 528  | 22.363 | 2.27E-17 |
| <i>Drechlerella stenobrocha</i> 248            | 345  | 26.038 | 2.19E-16 |
| <i>Monacrosporium haptotylum</i> CBS 200.50    | 541  | 22.892 | 2.02E-15 |
| <i>Metarhizium robertsii</i> ARSEF 23          | 379  | 23.009 | 1.05E-14 |
| <i>Botryosphaeria dothidea</i>                 | 442  | 26.432 | 6.73E-14 |
| <i>Stanjemonium grisellum</i> CBS 655.79       | 460  | 22.174 | 2.14E-13 |
| <i>Penicillium griseofulvum</i>                | 511  | 32.35  | 5E-24    |

**Table S7.** Spectroscopic data of compound **1**

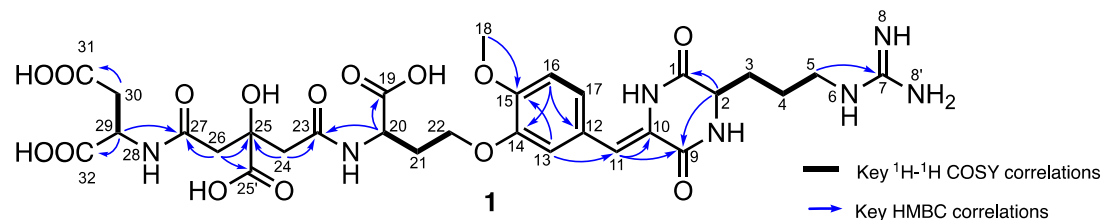

| position | <b>1</b>        |                          |
|----------|-----------------|--------------------------|
|          | <sup>13</sup> C | <sup>1</sup> H (J in Hz) |
| 1        | 168.9           | –                        |
| 2        | 55.2            | 4.27 (1H, t, 5.1)        |
| 3        | 31.2            | 1.94, 1.84 (each 1H, m)  |
| 4        | 23.2            | 1.66, 1.59 (each 1H, m)  |
| 5        | 40.8            | 3.17(2H, m)              |
| 7        | 157.1           | –                        |
| 9        | 162.7           | –                        |
| 10       | 123.9           | –                        |
| 11       | 118.9           | 6.81 (1H, s)             |
| 12       | 125.7           | –                        |
| 13       | 114.4           | 7.01 (1H, s)             |
| 14       | 147.7           | –                        |
| 15       | 149.6           | –                        |
| 16       | 112.6           | 7.03 (1H, d, 8.6)        |
| 17       | 123.3           | 7.07 (1H, d, 8.6)        |
| 18       | 56.1            | 3.84 (3H, s)             |
| 19       | 175.3           | –                        |
| 20       | 50.3            | 4.60 (1H, dd, 4.4, 8.9)  |
| 21       | 30.3            | 2.35, 2.16 (each 1H, m)  |
| 22       | 65.7            | 4.16, 4.09 (each 1H, m)  |
| 23       | 171.4           | –                        |
|          | 44.3            | 2.79, 2.70 (each 1H, d,  |
| 24       |                 | 14.4)                    |
| 25       | 74.1            | –                        |
|          | 44.0            | 2.82, 2.72 (each 1H, d,  |
| 26       |                 | 16.6)                    |
| 27       | 171.3           | –                        |
| 29       | 49.2            | 2.84 (1H, m)             |
| 30       | 35.9            | 2.88 (2H, m)             |
| 31       | 174.5           | –                        |
| 32       | 174.1           | –                        |
| 25'      | 176.6           | –                        |

In D<sub>2</sub>O 0.5% TFA-*d*, 500 MHz for <sup>1</sup>H and 125 MHz for <sup>13</sup>C NMR; Chemical shifts are reported in ppm. All signals are determined by <sup>1</sup>H-<sup>1</sup>H COSY, HMBC and HSQC correlation.

HRMS (ESI, M+H<sup>+</sup>) calculated for C<sub>30</sub>H<sub>40</sub>N<sub>7</sub>O<sub>15</sub> 738.2582; found 738.2609

[ $\alpha$ ]<sub>D</sub>: -120 (*c* 0.10, DMSO)

Note: The connectivity between homo-Ser and OH-Tyr was indicated by NMR chemical shift similarity of C-13, C-22, and C-15, and H-22 with those of **3b** and **5**. Considering the biosynthetic pathway of **1** and structural similarity with **7**, the geometry of C-11/C-10 is assigned to be *Z*. The *Z* configuration in **7** was determined by NOESY correlations for 1-NH/H-17 and H-11/H-13 as reported in ref <sup>1</sup>.

**Table S8.** Spectroscopic data of compound **2**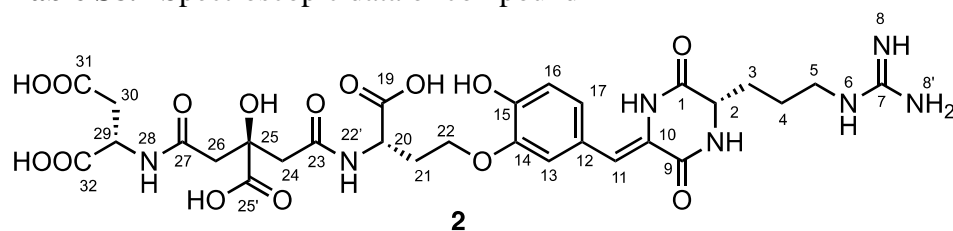

| position | <b>2</b>          |                              | Reported <b>2</b> (NK13650A) <sup>a</sup> |                                                               |
|----------|-------------------|------------------------------|-------------------------------------------|---------------------------------------------------------------|
|          | <sup>13</sup> C   | <sup>1</sup> H (J in Hz)     | <sup>13</sup> C                           | <sup>1</sup> H (J in Hz)                                      |
| 1        | 166.7             | –                            | 166.9                                     | –                                                             |
| 2        | 54.5              | 3.99 (1H, m)                 | 54.7                                      | 4.01 (1H, m)                                                  |
| 3        | 31.1              | 1.71 (2H, m)                 | 31.3                                      | 1.72 (2H, dt, 9.9, 6.1)                                       |
| 4        | 24.0              | 1.52 (2H, m)                 | 24.2                                      | 1.53 (2H, m)                                                  |
| 5        | 40.5 <sup>b</sup> | 3.10 (1H, q, 6.7)            | 40.5                                      | 3.11 (1H, q, 6.6)                                             |
| 6        |                   | 7.51 (1H, t, 4.9)            |                                           | 7.48 (1H, brt, 5.7)                                           |
| 7        | 156.6             | –                            | 156.8                                     | –                                                             |
| 8        |                   | 8.39 (1H, d, 2.1)            |                                           | 8.39 (1H, d, 2.7)                                             |
| 9        | 160.7             | –                            | 160.9                                     | –                                                             |
| 10       | 124.4             | –                            | 124.6                                     | –                                                             |
| 11       | 115.3             | 6.61 (1H, s)                 | 115.5                                     | 6.62 (1H, s)                                                  |
| 12       | 124.5             | –                            | 124.7                                     | –                                                             |
| 13       | 115.5             | 7.00 (1H, s)                 | 115.7                                     | 7.01 (1H, d, 1.7)                                             |
| 14       | 146.4             | –                            | 146.6                                     | –                                                             |
| 15       | 147.3             | –                            | 147.6                                     | –                                                             |
| 16       | 115.8             | 6.80 (1H, d, 8.1)            | 116.0                                     | 6.81 (1H, d, 8.2)                                             |
| 17       | 122.9             | 6.98 (1H, d, 8.4)            | 123.1                                     | 7.01 (1H, dd, 1.7, 8.2)                                       |
| 18       |                   | 9.82 (1H, s)                 |                                           | 9.81 (1H, s)                                                  |
| 19       | 173.3             | –                            | 173.4                                     | –                                                             |
| 20       | 49.2              | 4.40 (1H, m)                 | 49.5                                      | 4.41 (1H, dt, 4.8, 8.5)                                       |
| 21       | 30.7              | 2.00 (1H, m)<br>2.16 (1H, b) | 30.9                                      | 2.00 (1H, ddt, 8.6, 14.4, 5.8)<br>2.18 (1H, br-dq, 12.4, 6.5) |
| 22       | 65.2              | 3.98-4.06 (2H, m)            | 65.5                                      | 3.94-4.07 (2H, m)                                             |
| 22'      |                   | 8.26 (1H, d, 7.6)            |                                           | 8.26 (1H, d, 4.7)                                             |
| 23       | 169.5             | –                            | 169.7                                     | –                                                             |
| 24       | 43.1              | 2.51-2.65 (2H, m)            | 43.2                                      | 2.55-2.67 (2H, m)                                             |
| 25       | 73.2              | –                            | 73.5                                      | –                                                             |
| 26       | 43.1              | 2.51-2.65 (2H, m)            | 43.2                                      | 2.55-2.67 (2H, m)                                             |
| 27       | 169.3             | –                            | 169.5                                     | –                                                             |
| 25'      | 174.7             | –                            | 174.9                                     | –                                                             |
| 28       |                   | 8.26 (1H, d, 8.0)            |                                           | 8.26 (1H, d, 7.9)                                             |
| 29       | 48.6              | 4.50 (1H, m)                 | 48.6                                      | 4.51 (1H, dt, 7.9, 6.2)                                       |
| 30       | 36.1              | 2.51-2.65 (2H, m)            | 36.3                                      | 2.53-2.67 (2H, m)                                             |
| 31       | 171.6             | –                            | 171.8                                     | –                                                             |
| 32       | 172.2             | –                            | 172.4                                     | –                                                             |

In DMSO-*d*<sub>6</sub> 0.5% TFA-*d*, 500 MHz for <sup>1</sup>H and 125 MHz for <sup>13</sup>C NMR; Chemical shifts are reported in ppm.



<sup>a</sup>Recorded at 600 MHz for <sup>1</sup>H and 150 MHz for <sup>13</sup>C in DMSO-*d*<sub>6</sub> 0.5% TFA-*d* as reported in ref <sup>2</sup>.

<sup>b</sup>The C5 peak could not be detected in the carbon spectra because it overlapped with the DMSO peak, but can be detected in the HSQC spectrum.

HRMS (ESI, M+H<sup>+</sup>) calculated for C<sub>29</sub>H<sub>38</sub>N<sub>7</sub>O<sub>15</sub> 724.2426; found 724.2439.

Measured [α]<sub>D</sub> in this study: -115 (*c* 0.10, H<sub>2</sub>O); reported [α]<sub>D</sub>: -157 (*c* 0.15, H<sub>2</sub>O).<sup>2</sup>

**Table S9.** Spectroscopic data of compound **3**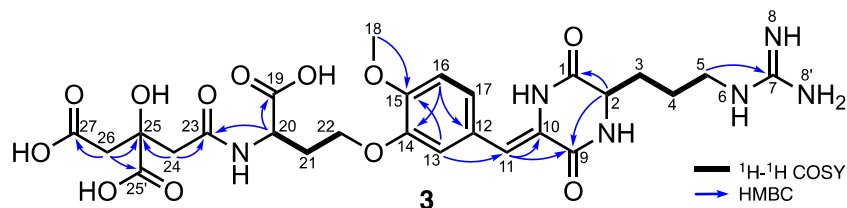

| position | <b>3</b>        |                                  |
|----------|-----------------|----------------------------------|
|          | <sup>13</sup> C | <sup>1</sup> H ( <i>J</i> in Hz) |
| 1        | 168.6           | –                                |
| 2        | 54.8            | 4.28 (1H, t, 5.1)                |
| 3        | 30.8            | 1.94, 1.85 (each 1H, m)          |
| 4        | 22.8            | 1.67, 1.59 (each 1H, m)          |
| 5        | 40.4            | 3.17 (2H, m)                     |
| 7        | 156.7           | –                                |
| 9        | 162.4           | –                                |
| 10       | 123.6           | –                                |
| 11       | 118.6           | 6.83 (1H, s)                     |
| 12       | 125.3           | –                                |
| 13       | 114.0           | 7.01 (1H, s)                     |
| 14       | 147.3           | –                                |
| 15       | 149.3           | –                                |
| 16       | 112.3           | 7.04 (1H, d, 8.6)                |
| 17       | 123.0           | 7.08 (1H, d, 8.6)                |
| 18       | 55.7            | 3.84 (3H, s)                     |
| 19       | 174.9           | –                                |
| 20       | 50.0            | 4.60 (1H, dd, 4.4, 8.9)          |
| 21       | 30.1            | 2.36, 2.15 (each 1H, m)          |
| 22       | 65.3            | 4.17, 4.09 (each 1H, m)          |
| 23       | 170.9           | –                                |
| 24       | 44.2            | 2.79, 2.70 (each 1H, d, 14.4)    |
| 25       | 73.4            | –                                |
| 26       | 42.8            | 2.93, 2.72 (each 1H, d, 16.6)    |
| 27       | 173.3           | –                                |
| 25'      | 176.4           | –                                |

In D<sub>2</sub>O 0.5% TFA-*d*, 500 MHz for <sup>1</sup>H and 125 MHz for <sup>13</sup>C NMR; Chemical shifts are reported in ppm. All signals are determined by <sup>1</sup>H-<sup>1</sup>H COSY, HMBC and HSQC correlation.

HRMS (ESI, M+H<sup>+</sup>) calculated for C<sub>26</sub>H<sub>35</sub>N<sub>6</sub>O<sub>12</sub> 623.2313; found 623.2302.

[α]<sub>D</sub>: -18 (*c* 0.20, DMSO)

The connectivity between homo-Ser and OH-Tyr was indicated by NMR chemical shift similarity of C-13, C-22, and C-15, and H-22 with those of **3b** and **5**.

**Table S10.** Spectroscopic data of compound **3b**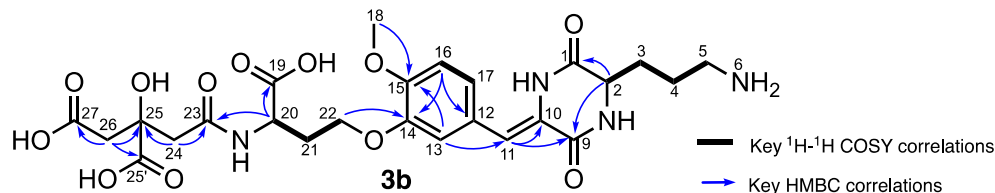

| position | <b>3b</b>       |                               |
|----------|-----------------|-------------------------------|
|          | $^{13}\text{C}$ | $^1\text{H}$ ( $J$ in Hz)     |
| 1        | 168.2           | –                             |
| 2        | 54.6            | 4.31 (1H, t, 5.1)             |
| 3        | 30.5            | 1.98, 1.89 (each 1H, m)       |
| 4        | 21.7            | 1.76, 1.70 (each 1H, m)       |
| 5        | 38.8            | 3.00 (2H, m)                  |
| 9        | 162.4           | –                             |
| 10       | 123.5           | –                             |
| 11       | 118.6           | 6.83 (1H, s)                  |
| 12       | 125.3           | –                             |
| 13       | 114.0           | 7.01 (1H, s)                  |
| 14       | 147.3           | –                             |
| 15       | 149.3           | –                             |
| 16       | 112.3           | 7.04 (1H, d, 8.6)             |
| 17       | 123.0           | 7.10 (1H, d, 8.6)             |
| 18       | 55.7            | 3.84 (3H, s)                  |
| 19       | 174.9           | –                             |
| 20       | 50.0            | 4.60 (1H, dd, 4.4, 8.9)       |
| 21       | 30.0            | 2.36, 2.15 (each 1H, m)       |
| 22       | 65.3            | 4.17, 4.09 (each 1H, m)       |
| 23       | 170.9           | –                             |
| 24       | 44.9            | 2.79, 2.70 (each 1H, d, 14.4) |
| 25       | 73.4            | –                             |
| 26       | 42.8            | 2.93, 2.72 (each 1H, d, 16.6) |
| 27       | 173.3           | –                             |
| 25'      | 176.4           | –                             |

In  $\text{D}_2\text{O}$  0.5% TFA- $d$ , 500 MHz for  $^1\text{H}$  and 125 MHz for  $^{13}\text{C}$  NMR; Chemical shifts are reported in ppm. All signals are determined by  $^1\text{H}$ - $^1\text{H}$  COSY, HMBC and HSQC correlation.

HRMS (ESI,  $\text{M}+\text{H}^+$ ) calculated for  $\text{C}_{25}\text{H}_{33}\text{N}_4\text{O}_{12}$  581.2095; found 581.2074.

$[\alpha]_{\text{D}}$ : +1 ( $c$  0.20,  $\text{H}_2\text{O}$ )

**Table S11.** Spectroscopic data for compound **4**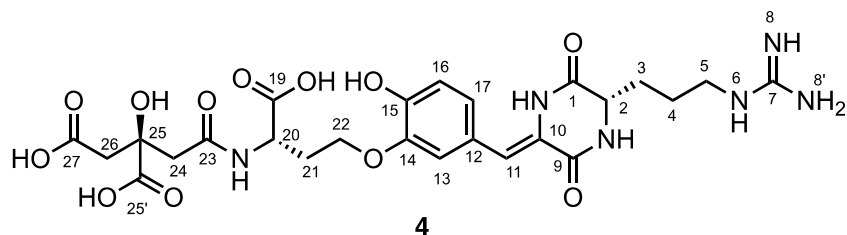

| position | <b>4</b>          |                                  | Reported <b>4</b> (NK13650B) <sup>a</sup> |                                                            |
|----------|-------------------|----------------------------------|-------------------------------------------|------------------------------------------------------------|
|          | <sup>13</sup> C   | <sup>1</sup> H ( <i>J</i> in Hz) | <sup>13</sup> C                           | <sup>1</sup> H ( <i>J</i> in Hz)                           |
| 1        | 166.7             | –                                | 166.9                                     | –                                                          |
| 2        | 54.5              | 4.01 (1H, m)                     | 54.7                                      | 4.01 (1H, m)                                               |
| 3        | 31.1              | 1.73 (2H, m)                     | 31.3                                      | 1.72 (2H, dt, 10.0, 5.8)                                   |
| 4        | 24.0              | 1.53 (2H, m)                     | 24.2                                      | 1.53 (2H, m)                                               |
| 5        | 40.5 <sup>b</sup> | 3.11 (1H, q, 7.0)                | 40.5                                      | 3.10 (1H, q, 6.5)                                          |
| 6        |                   | 7.52 (1H, t, 5.5)                |                                           | 7.48 (1H, t, 6.0)                                          |
| 7        | 156.7             | –                                | 156.8                                     | –                                                          |
| 9        | 160.7             | –                                | 160.9                                     | –                                                          |
| 10       | 124.4             | –                                | 124.6                                     | –                                                          |
| 11       | 115.3             | 6.62 (1H, s)                     | 115.5                                     | 6.62 (1H, s)                                               |
| 12       | 124.5             | –                                | 124.7                                     | –                                                          |
| 13       | 115.5             | 7.02 (1H, s)                     | 115.7                                     | 7.01 (1H, d, 1.7)                                          |
| 14       | 146.4             | –                                | 146.6                                     | –                                                          |
| 15       | 147.4             | –                                | 147.6                                     | –                                                          |
| 16       | 115.8             | 6.82 (1H, d, 8.0)                | 116.0                                     | 6.81 (1H, d, 8.0)                                          |
| 17       | 122.9             | 7.00 (1H, d, 8.5)                | 123.1                                     | 6.99 (1H, dd, 1.7, 8.0)                                    |
| 18       |                   | 9.83 (1H, s)                     |                                           | 9.80 (1H, s)                                               |
| 19       | 173.3             | –                                | 173.4                                     | –                                                          |
| 20       | 49.3              | 4.43 (1H, m)                     | 49.5                                      | 4.42 (1H, ddd, 8.9, 7.2, 5.2)                              |
| 21       | 30.7              | 2.19, 2.01 (each 1H, m)          | 30.9                                      | 2.00 (1H, ddt, 8.9, 14.1, 5.8)<br>2.19 (1H, dq, 6.5, 14.1) |
| 22       | 65.3              | 4.06, 4.01 (each 1H, m)          | 65.5                                      | 4.05 (1H, dt, 10.9, 5.9)<br>4.00 (1H, m)                   |
|          |                   | 8.30 (1H, d, 8.0)                |                                           | 8.27 (1H, d, 7.7)                                          |
| 23       | 169.5             | –                                | 169.7                                     | –                                                          |
| 24       | 43.1              | 2.54-2.76, (2H, m)               | 43.3                                      | 2.55-2.67 (2H, d, 14.8)                                    |
| 25       | 72.8              | –                                | 73.0                                      | –                                                          |
| 26       | 42.9              | 2.54-2.76, (2H, m)               | 43.1                                      | 2.74, 2.62 (each 1H, d, 15.6)                              |
| 27       | 171.3             | –                                | 171.5                                     | –                                                          |
| 25'      | 174.5             | –                                | 174.8                                     | –                                                          |

In DMSO-*d*<sub>6</sub> 0.5% TFA-*d*, 500 MHz for <sup>1</sup>H and 125 MHz for <sup>13</sup>C NMR; Chemical shifts are reported in ppm.

<sup>a</sup>Recorded at 600 MHz for <sup>1</sup>H and 150 MHz for <sup>13</sup>C in DMSO-*d*<sub>6</sub> 0.5% TFA-*d* as reported in ref <sup>2</sup>.

<sup>b</sup>The C5 peak could not be detected in the carbon spectra because it overlapped with the DMSO peak, but can be detected in the HSQC spectrum.

HRMS (ESI, M+H<sup>+</sup>) calculated for C<sub>25</sub>H<sub>33</sub>N<sub>6</sub>O<sub>12</sub> 609.2157; found 609.2161.

**Table S12.** Spectroscopic data of compound **5**

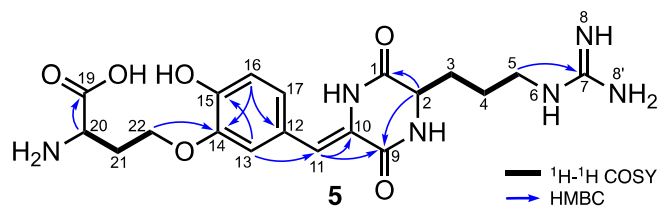

| position | <b>5</b>           |                                  |
|----------|--------------------|----------------------------------|
|          | <sup>13</sup> C    | <sup>1</sup> H ( <i>J</i> in Hz) |
| 1        | 168.6              | –                                |
| 2        | 54.9               | 4.28(1H, t, 6.4)                 |
| 3        | 30.8               | 1.93, 1.85 (each 1H, m)          |
| 4        | 22.9               | 1.66, 1.58 (each 1H, m)          |
| 5        | 40.5               | 3.19 (2H, m)                     |
| 7        | 156.7              | –                                |
| 9        | 162.4              | –                                |
| 10       | 123.4 <sup>a</sup> | –                                |
| 11       | 118.7              | 6.81 (1H, s)                     |
| 12       | 125.0              | –                                |
| 13       | 114.8              | 7.02 (1H, s)                     |
| 14       | 146.1              | –                                |
| 15       | 146.4              | –                                |
| 16       | 116.1              | 6.94 (1H, d, 8.7)                |
| 17       | 123.3 <sup>a</sup> | 7.03 (1H, d, 8.7)                |
| 18       | 172.3              | –                                |
| 19       | 51.8               | 4.23 (1H, dd, 4.4, 8.9)          |
| 20       | 29.4               | 2.45, 2.38 (each 1H, m)          |
| 21       | 65.8               | 4.24 (2H, m)                     |

<sup>a</sup> Carbon data for positions 10/17 and 14/15 may be interchangeable.

In D<sub>2</sub>O 0.5% TFA-*d*, 500 MHz for <sup>1</sup>H and 125 MHz for <sup>13</sup>C NMR; Chemical shifts are reported in ppm. All signals are determined by <sup>1</sup>H-<sup>1</sup>H COSY, HMBC and HSQC correlation.

HRMS (ESI, M+H<sup>+</sup>) calculated for C<sub>19</sub>H<sub>27</sub>N<sub>6</sub>O<sub>6</sub> 435.1992; found 435.2002.

[α]<sub>D</sub>: -72 (*c* 0.20, H<sub>2</sub>O)

**Table S13.** Spectroscopic data of compound **6**

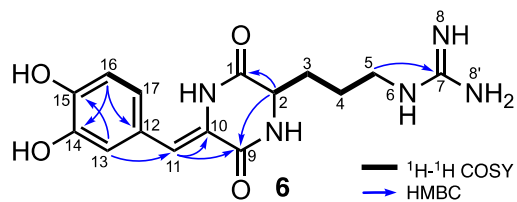

| position | <b>6</b>        |                                  |
|----------|-----------------|----------------------------------|
|          | <sup>13</sup> C | <sup>1</sup> H ( <i>J</i> in Hz) |
| 1        | 168.7           | –                                |
| 2        | 54.9            | 4.26 (1H, t, 5.0)                |
| 3        | 30.8            | 1.94, 1.84 (each 1H, m)          |
| 4        | 22.8            | 1.67, 1.59 (each 1H, m)          |
| 5        | 40.4            | 3.17 (2H, m)                     |
| 7        | 156.7           | –                                |
| 9        | 162.6           | –                                |
| 10       | 123.2           | –                                |
| 11       | 118.9           | 6.77 (1H, s)                     |
| 12       | 125.0           | –                                |
| 13       | 116.6           | 6.96 (1H, s)                     |
| 14       | 144.2           | –                                |
| 15       | 145.1           | –                                |
| 16       | 116.5           | 6.91 (1H, d, 8.7)                |
| 17       | 122.4           | 6.92 (1H, d, 8.7)                |

In D<sub>2</sub>O 0.5% TFA-*d*, 500 MHz for <sup>1</sup>H and 125 MHz for <sup>13</sup>C NMR; Chemical shifts are reported in ppm. All signals are determined by <sup>1</sup>H-<sup>1</sup>H COSY, HMBC and HSQC correlation.

HRMS (ESI, M+H<sup>+</sup>) calculated for C<sub>15</sub>H<sub>20</sub>N<sub>5</sub>O<sub>4</sub> 334.1515; found 334.1526.

[α]<sub>D</sub>: -90 (*c* 0.20, H<sub>2</sub>O)

**Table S14.** Spectroscopic data of compound **9**

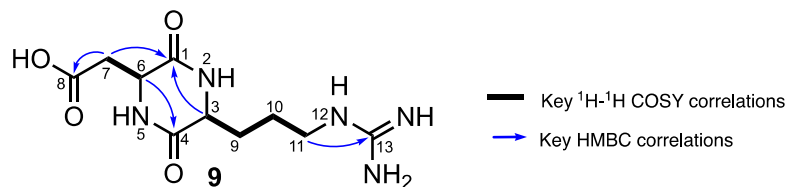

| position | <b>9</b>        |                                                      |
|----------|-----------------|------------------------------------------------------|
|          | $^{13}\text{C}$ | $^1\text{H}$ ( <i>J</i> in Hz)                       |
| 1        | 169.8           | —                                                    |
| 3        | 54.1            | 4.15 (1H, t, 6.0)                                    |
| 4        | 169.7           | —                                                    |
| 6        | 52.4            | 4.31 (1H, dd, 7.7, 4.1)                              |
| 7        | 40.9            | 2.71 (1H, dd, 16.3, 4.1)<br>2.63 (1H, dd, 16.3, 7.7) |
| 8        | 177.1           | —                                                    |
| 9        | 30.3            | 1.83 (2H, m)                                         |
| 10       | 23.3            | 1.55 (2H, m)                                         |
| 11       | 40.6            | 3.19 (2H, m)                                         |
| 12       | 156.7           | —                                                    |

In  $\text{D}_2\text{O}$ , 500 MHz for  $^1\text{H}$  and 125 MHz for  $^{13}\text{C}$  NMR; Chemical shifts are reported in ppm. All signals are determined by  $^1\text{H}$ - $^1\text{H}$  COSY, HMBC and HSQC correlation.

HRMS (ESI,  $\text{M}+\text{H}^+$ ) calculated for  $\text{C}_{10}\text{H}_{18}\text{N}_5\text{O}_4$  272.1359; found 272.1381.

$[\alpha]_{\text{D}}$ : -18 (*c* 0.10,  $\text{H}_2\text{O}$ )



**Table S15.** Spectroscopic data of compound **10**

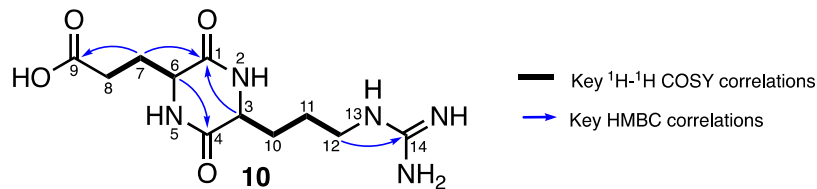

| position | <b>10</b>       |                           |
|----------|-----------------|---------------------------|
|          | $^{13}\text{C}$ | $^1\text{H}$ ( $J$ in Hz) |
| 1        | 169.8           | —                         |
| 3        | 54.0            | 4.03 (1H, m)              |
| 4        | 169.8           | —                         |
| 6        | 54.1            | 4.04 (1H, m)              |
| 7        | 30.3            | 1.93 (2H, m)              |
| 8        | 32.6            | 2.11 (2H, m)              |
| 9        | 181.2           | —                         |
| 10       | 30.2            | 1.72 (2H, m)              |
| 11       | 23.3            | 1.46 (2H, m)              |
| 12       | 40.6            | 3.09 (2H, m)              |
| 14       | 156.7           | —                         |

In  $\text{D}_2\text{O}$ , 500 MHz for  $^1\text{H}$  and 125 MHz for  $^{13}\text{C}$  NMR; Chemical shifts are reported in ppm. All signals are determined by  $^1\text{H}$ - $^1\text{H}$  COSY, HMBC and HSQC correlation.

HRMS (ESI,  $\text{M}+\text{H}^+$ ) calculated for  $\text{C}_{11}\text{H}_{20}\text{N}_5\text{O}_4$  286.1515; found 286.1516.

$[\alpha]_{\text{D}}$ : -14 ( $c$  0.20,  $\text{H}_2\text{O}$ )

**Table S16.** Spectroscopic data of compound **13**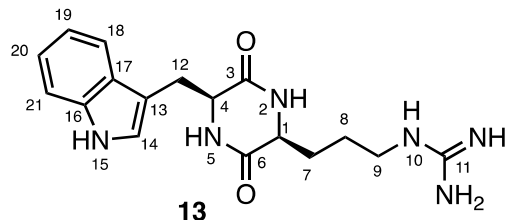

| position | <b>13</b>       |                                                  | cyclo(L-Arg-L-Trp) <sup>a</sup> |                                                    | cyclo(D-Arg-L-Trp) <sup>a</sup> |                                                                |
|----------|-----------------|--------------------------------------------------|---------------------------------|----------------------------------------------------|---------------------------------|----------------------------------------------------------------|
|          | <sup>13</sup> C | <sup>1</sup> H ( <i>J</i> in Hz)                 | <sup>13</sup> C                 | <sup>1</sup> H ( <i>J</i> in Hz)                   | <sup>13</sup> C                 | <sup>1</sup> H ( <i>J</i> in Hz)                               |
| 1        | 55.3            | 3.68 (1H, t, 6.3)                                | 55.2                            | 3.68 (1H, ddd, 7.7, 5.2, 1.5)                      | 52.8                            | 2.77 (1H, m)                                                   |
| 3        | 170.0           |                                                  | 169.9                           |                                                    | 169.9                           |                                                                |
| 4        | 57.6            | 4.31 (1H, s)                                     | 57.5                            | 4.31 (1H, ddd, 4.8, 3.7, 1.3)                      | 56.2                            | 4.23 (1H, ddd, 4.8, 4.0, 1.1)                                  |
| 6        | 169.7           |                                                  | 169.5                           |                                                    | 168.4                           |                                                                |
| 7        | 32.2            | 0.72, 0.50 (each 1H, m)                          | 32.1                            | 0.49 (2H, m)                                       | 28.1                            | 1.44 (2H, m)                                                   |
| 8        | 24.7            | 0.86 (2H, m)                                     | 24.5                            | 0.87 (2H, m)                                       | 22.8                            | 1.67 (2H, m)                                                   |
| 9        | 41.9            | 2.62, (2H, t, 6.5)                               | 41.7                            | 2.62 (2H, td, 7.0, 2.0)                            | 40.5                            | 1.44 (2H, m)                                                   |
| 11       | 158.6           | –                                                | 158.4                           | –                                                  | –                               | –                                                              |
| 12       | 30.6            | 3.15, (1H, dd, 15.0, 3.0)<br>3.49, (1H, d, 14.5) | 30.4                            | 3.14 (1H, dd, 14.7, 4.6), 3.49 (1H, dd, 14.8, 3.6) | 29.6                            | 3.15 (1H, ddd, 14.7, 4.5, 0.7), 3.47 (1H, ddd, 14.7, 3.9, 0.7) |
| 13       | 109.8           | –                                                | 109.6                           | –                                                  | –                               | –                                                              |
| 14       | 126.2           | 7.08 (1H, s)                                     | 126.0                           | 7.08 (1H, s)                                       | 124.6                           | 7.06 (1H, s)                                                   |
| 16       | 138.0           | –                                                | 137.8                           | –                                                  | 136.4                           | –                                                              |
| 17       | 129.6           | –                                                | 129.3                           | –                                                  | 127.3                           | –                                                              |
| 18       | 120.5           | 7.63 (1H, d, 8.0)                                | 120.2                           | 7.63 (1H, dd, 8.0, 1.0)                            | 118.3                           | 7.60 (1H, dt, 8.0, 1.0)                                        |
| 19       | 120.4           | 7.01 (1H, t, 8.0)                                | 120.2                           | 7.01 (1H, ddd, 8.0, 7.0, 1.1)                      | 118.7                           | 7.00 (1H, ddd, 8.0, 7.0, 1.0)                                  |
| 20       | 122.7           | 7.10 (1H, d, 8.0)                                | 122.5                           | 7.09 (1H, ddd, 8.0, 7.0, 1.1)                      | 121.1                           | 7.08 (1H, ddd, 8.2, 7.0, 1.2)                                  |
| 21       | 112.3           | 7.34 (1H, d, 8.5)                                | 112.1                           | 7.34 (1H, d, 8.1)                                  | 110.7                           | 7.33 (1H, dt, 8.1, 0.9)                                        |

<sup>a</sup>Recorded at 600 MHz for <sup>1</sup>H and 150 MHz for <sup>13</sup>C in CD<sub>3</sub>OD.

HRMS (ESI, M+H<sup>+</sup>) calculated for C<sub>17</sub>H<sub>23</sub>N<sub>6</sub>O<sub>2</sub> 343.1883; found 343.1869

Note: Marfey's analysis was used to determine the Trp moiety in **13** is in L-configuration (Fig. S20). The proton NMR spectrum of **13** corresponded to that of cyclo(L-Arg-L-Trp) rather than cyclo(D-Arg-L-Trp),<sup>3</sup> with a similar upfield shift in the Arg side chain resonances, supporting L-configuration of Arg in **13**.

**Table S17.** Spectroscopic data of compound **14**

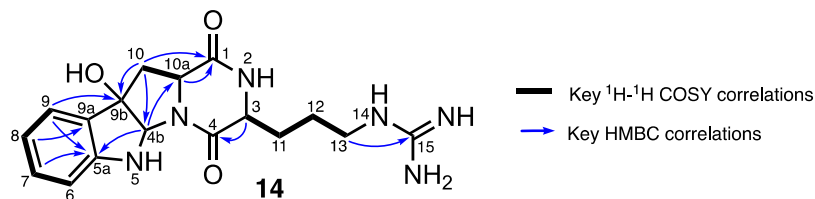

| position | <b>14</b>       |                                                       |
|----------|-----------------|-------------------------------------------------------|
|          | <sup>13</sup> C | <sup>1</sup> H ( <i>J</i> in Hz)                      |
| 1        | 170.5           | —                                                     |
| 3        | 54.5            | 4.31 (1H, m)                                          |
| 4        | 167.2           | —                                                     |
| 4b       | 80.1            | 5.46 (1H, s)                                          |
| 5a       | 149.4           | —                                                     |
| 6        | 111.8           | 6.83 (1H, d, 7.3)                                     |
| 7        | 131.1           | 7.31 (1H, t, 7.3)                                     |
| 8        | 121.2           | 7.00 (1H, t, 7.3)                                     |
| 9        | 124.3           | 7.45 (1H, d, 7.3)                                     |
| 9a       | 128.7           | —                                                     |
| 9b       | 85.6            | —                                                     |
| 10       | 40.3            | 2.92 (1H, dd, 11.8, 6.3)<br>2.50 (1H, dd, 12.0, 11.8) |
| 10a      | 57.9            | 4.19 (1H, dd, 12.0, 6.3)                              |
| 11       | 26.5            | 1.98, 1.86 (each 1H, m)                               |
| 12       | 22.6            | 1.69, 1.56 (each 1H, m)                               |
| 13       | 40.6            | 3.22 (2H, m)                                          |
| 15       | 156.7           | —                                                     |

In D<sub>2</sub>O, 500 MHz for <sup>1</sup>H and 125 MHz for <sup>13</sup>C NMR; Chemical shifts are reported in ppm. All signals are determined by <sup>1</sup>H-<sup>1</sup>H COSY, HMBC and HSQC correlation.

HRMS (ESI, M+H<sup>+</sup>) calculated for C<sub>17</sub>H<sub>23</sub>N<sub>6</sub>O<sub>3</sub> 359.1832; found 359.1828.

[α]<sub>D</sub>: -86 (c 0.20, H<sub>2</sub>O)

**Table S18.** Spectroscopic data of compound **15**

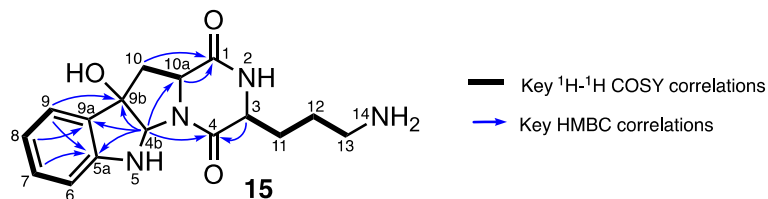

| position | <b>15</b>       |                                                  |
|----------|-----------------|--------------------------------------------------|
|          | $^{13}\text{C}$ | $^1\text{H}$ ( $J$ in Hz)                        |
| 1        | 170.7           | —                                                |
| 3        | 54.2            | 4.30 (1H, m)                                     |
| 4        | 167.0           | —                                                |
| 4b       | 80.0            | 5.45 (1H, s)                                     |
| 5a       | 149.4           | —                                                |
| 6        | 111.8           | 6.82 (1H, d, 7.3)                                |
| 7        | 131.1           | 7.29 (1H, ddd, 7.6, 7.4, 1.6)                    |
| 8        | 121.2           | 6.98 (1H, ddd, 7.4, 7.1, 2.2)                    |
| 9        | 124.3           | 7.43 (1H, dd, 7.1, 1.6)                          |
| 9a       | 128.7           | —                                                |
| 9b       | 85.6            | —                                                |
| 10       | 40.1            | 2.91 (1H, dd, 11.8, 6.2)<br>2.52 (1H, brt, 11.8) |
| 10a      | 58.0            | 4.19 (1H, dd, 12.3, 6.2)                         |
| 11       | 26.2            | 2.01, 1.87 (each 1H, m)                          |
| 12       | 21.5            | 1.77, 1.65 (each 1H, m)                          |
| 13       | 39.0            | 3.00 (2H, m)                                     |

In  $\text{D}_2\text{O}$ , 500 MHz for  $^1\text{H}$  and 125 MHz for  $^{13}\text{C}$  NMR; Chemical shifts are reported in ppm. All signals are determined by  $^1\text{H}$ - $^1\text{H}$  COSY, HMBC and HSQC correlation.

HRMS (ESI,  $\text{M}+\text{H}^+$ ) calculated for  $\text{C}_{16}\text{H}_{21}\text{N}_4\text{O}_3$  317.1614; found 317.1601.

$[\alpha]_{\text{D}}$ : -63 ( $c$  0.20,  $\text{H}_2\text{O}$ )

**Table S19.** Spectroscopic data of compound **16**

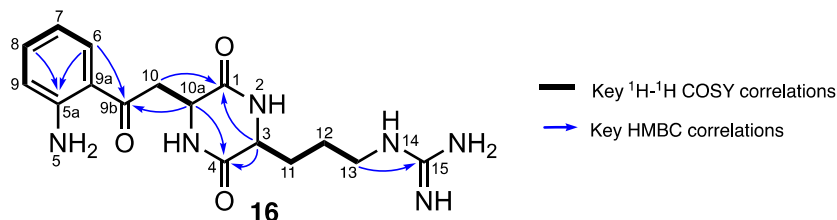

| position | <b>16</b>       |                                                      |
|----------|-----------------|------------------------------------------------------|
|          | <sup>13</sup> C | <sup>1</sup> H (J in Hz)                             |
| 1        | 169.6           | –                                                    |
| 3        | 54.0            | 4.25 (1H, t, 4.8)                                    |
| 4        | 169.9           | –                                                    |
| 5a       | 132.9           | –                                                    |
| 6        | 131.8           | 8.10 (1H, d, 7.8)                                    |
| 7        | 127.9           | 7.53 (1H, t, 7.8)                                    |
| 8        | 135.4           | 7.71 (1H, t, 7.8)                                    |
| 9        | 124.2           | 7.41 (1H, d, 7.8)                                    |
| 9a       | 126.5           | –                                                    |
| 9b       | 199.6           | –                                                    |
| 10       | 42.4            | 3.80 (1H, dd, 18.2, 3.8)<br>3.63 (1H, dd, 18.2, 6.8) |
| 10a      | 50.6            | 4.64 (1H, m)                                         |
| 11       | 29.6            | 1.95, 1.86 (1H, m)                                   |
| 12       | 23.3            | 1.76, 1.64 (1H, m)                                   |
| 13       | 40.6            | 3.22 (2H, m)                                         |
| 15       | 156.7           | –                                                    |

In D<sub>2</sub>O 0.5% TFA-*d*, 500 MHz for <sup>1</sup>H and 125 MHz for <sup>13</sup>C NMR; Chemical shifts are reported in ppm. All signals are determined by <sup>1</sup>H-<sup>1</sup>H COSY, HMBC and HSQC correlation.

HRMS (ESI, M+H<sup>+</sup>) calculated for C<sub>16</sub>H<sub>23</sub>N<sub>6</sub>O<sub>3</sub> 347.1832; found 347.1831.

[α]<sub>D</sub>: -3 (c 0.20, H<sub>2</sub>O)

**Table S20.** Spectroscopic data of compound **17**

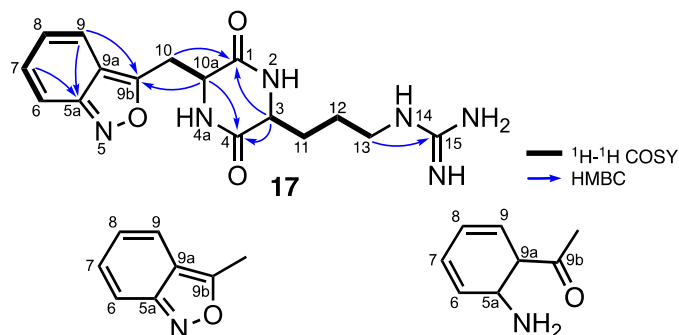

**3-Methylbenzo[c]isoxazole (2-Aminophenyl)ethanone**

| position | <b>17</b>       |                                                      | 3-methylbenzo[c]isoxazole <sup>a</sup> |                               | (2-aminophenyl)ethanone <sup>a</sup> |                          |
|----------|-----------------|------------------------------------------------------|----------------------------------------|-------------------------------|--------------------------------------|--------------------------|
|          | <sup>13</sup> C | <sup>1</sup> H (J in Hz)                             | <sup>13</sup> C                        | <sup>1</sup> H (J in Hz)      | <sup>13</sup> C                      | <sup>1</sup> H (J in Hz) |
| 1        | 168.1           | –                                                    |                                        |                               |                                      |                          |
| 3        | 53.9            | 3.99 (1H, dd, 5.2, 2.1)                              |                                        |                               |                                      |                          |
| 4        | 169.2           | –                                                    |                                        |                               |                                      |                          |
| 5a       | 157.3           | –                                                    | 157.2                                  | –                             | 150.3                                | –                        |
| 6        | 113.8           | 7.44 (1H, d, 8.9)                                    | 115.0                                  | 7.43-7.41 (1H, m)             | 117.3                                | 6.70-6.64 (1H, m)        |
| 7        | 133.0           | 7.36 (1H, t, 8.9)                                    | 130.9                                  | 7.25 (1H, ddd, 9.1, 6.4, 0.9) | 134.5                                | 7.75-7.71 (1H, m)        |
| 8        | 125.1           | 7.03 (1H, t, 8.9)                                    | 122.9                                  | 6.91 (1H, dd, 8.8, 6.4)       | 118.4                                | 6.70-6.64 (1H, m)        |
| 9        | 120.2           | 7.50 (1H, d, 8.9)                                    | 120.0                                  | 7.51-7.48 (1H, m)             | 132.1                                | 7.31-7.25 (1H, m)        |
| 9a       | 117.7           | –                                                    | 115.8                                  | –                             | 115.9                                | –                        |
| 9b       | 164.8           | –                                                    | 165.8                                  | –                             | 200.9                                | –                        |
| 10       | 30.3            | 3.92 (1H, dd, 15.5, 3.3)<br>3.58 (1H, dd, 15.5, 5.1) |                                        |                               |                                      |                          |
| 10a      | 54.1            | 4.62 (1H, m)                                         |                                        |                               |                                      |                          |
| 11       | 29.4            | 1.14, 1.01 (1H, m)                                   |                                        |                               |                                      |                          |
| 12       | 22.3            | 0.48, 0.31 (1H, m)                                   |                                        |                               |                                      |                          |
| 13       | 40.7            | 2.68 (2H, m)                                         |                                        |                               |                                      |                          |
| 15       | 156.7           | –                                                    |                                        |                               |                                      |                          |

In D<sub>2</sub>O 0.5% TFA-*d*, 500 MHz for <sup>1</sup>H and 125 MHz for <sup>13</sup>C NMR; Chemical shifts are reported in ppm. All signals are determined by <sup>1</sup>H-<sup>1</sup>H COSY, HMBC and HSQC correlation.

<sup>a</sup>Recorded at 400 MHz for <sup>1</sup>H and 100 MHz for <sup>13</sup>C in CDCl<sub>3</sub>. The existence of anthranil moiety was supported by comparison of the experimental NMR data of **17** with the reported NMR data for 3-methylbenzo[c]isoxazole in ref.<sup>4</sup> and (2-aminophenyl)ethanone in ref.<sup>5</sup>.

HRMS (ESI, M+H<sup>+</sup>) calculated for C<sub>16</sub>H<sub>21</sub>N<sub>6</sub>O<sub>3</sub> 345.1675; found 345.1666.

[α]<sub>D</sub>: -44 (*c* 0.10, MeOH)

**Table S21.** Spectroscopic data of compound **18**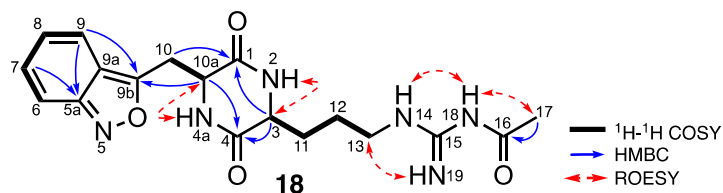

| position | <b>18</b>       |                                                      | 3-methylbenzo[ <i>c</i> ]isoxazole <sup>a</sup> |                                  | (2-aminophenyl)ethanone <sup>a</sup> |                                  |
|----------|-----------------|------------------------------------------------------|-------------------------------------------------|----------------------------------|--------------------------------------|----------------------------------|
|          | <sup>13</sup> C | <sup>1</sup> H ( <i>J</i> in Hz)                     | <sup>13</sup> C                                 | <sup>1</sup> H ( <i>J</i> in Hz) | <sup>13</sup> C                      | <sup>1</sup> H ( <i>J</i> in Hz) |
| 1        | 166.0           | –                                                    |                                                 |                                  |                                      |                                  |
| 3        | 53.2            | 3.78 (1H, dd, 6.3, 2.0)                              |                                                 |                                  |                                      |                                  |
| 4        | 166.8           | –                                                    |                                                 |                                  |                                      |                                  |
| 5a       | 156.4           | –                                                    | 157.2                                           | –                                | 150.3                                | –                                |
| 6        | 114.1           | 7.49 (1H, d, 8.2)                                    | 115.0                                           | 7.43-7.41 (1H, m)                | 117.3                                | 6.70-6.64 (1H, m)                |
| 7        | 131.3           | 7.31 (1H, t, 8.2)                                    | 130.9                                           | 7.25 (1H, ddd, 9.1, 6.4, 0.9)    | 134.5                                | 7.75-7.71 (1H, m)                |
| 8        | 123.3           | 6.98 (1H, t, 8.2)                                    | 122.9                                           | 6.91 (1H, dd, 8.8, 6.4)          | 118.4                                | 6.70-6.64 (1H, m)                |
| 9        | 120.9           | 7.63 (1H, d, 8.2)                                    | 120.0                                           | 7.51-7.48 (1H, m)                | 132.1                                | 7.31-7.25 (1H, m)                |
| 9a       | 116.6           | –                                                    | 115.8                                           | –                                | 115.9                                | –                                |
| 9b       | 165.3           | –                                                    | 165.8                                           | –                                | 200.9                                | –                                |
| 10       | 30.2            | 3.73 (1H, dd, 15.7, 3.6)<br>3.53 (1H, dd, 15.7, 5.1) |                                                 |                                  |                                      |                                  |
| 10a      | 53.3            | 4.42 (1H, m)                                         |                                                 |                                  |                                      |                                  |
| 11       | 29.7            | 1.28, 1.10 (each 1H, m)                              |                                                 |                                  |                                      |                                  |
| 12       | 22.5            | 1.03, 1.00 (each 1H, m)                              |                                                 |                                  |                                      |                                  |
| 13       | 40.5            | 3.26 (2H, m)                                         |                                                 |                                  |                                      |                                  |
| 15       | 152.9           | –                                                    |                                                 |                                  |                                      |                                  |
| 16       | 172.6           | –                                                    |                                                 |                                  |                                      |                                  |
| 17       | 24.2            | 2.15 (3H, s)                                         |                                                 |                                  |                                      |                                  |
| 2-NH     | –               | 8.19 (1H, brs)                                       |                                                 |                                  |                                      |                                  |
| 4a-NH    | –               | 8.42 (1H, brs)                                       |                                                 |                                  |                                      |                                  |
| 14-NH    | –               | 8.98 (1H, brs)                                       |                                                 |                                  |                                      |                                  |
| 18-NH    | –               | 11.84 (1H, brs)                                      |                                                 |                                  |                                      |                                  |
| 19-NH    | –               | 8.66 (1H, brs)                                       |                                                 |                                  |                                      |                                  |

In DMSO-*d*<sub>6</sub>, 500 MHz for <sup>1</sup>H and 125 MHz for <sup>13</sup>C NMR; Chemical shifts are reported in ppm. All signals are determined by <sup>1</sup>H-<sup>1</sup>H COSY, HMBC, ROESY, and HSQC correlation.

<sup>a</sup>Recorded at 400 MHz for <sup>1</sup>H and 100 MHz for <sup>13</sup>C in CDCl<sub>3</sub>. The existence of anthranil moiety was supported by comparison of the experimental NMR data of **17** with the reported NMR data for 3-methylbenzo[*c*]isoxazole in ref.<sup>4</sup> and (2-aminophenyl)ethanone in ref.<sup>5</sup>.

HRMS (ESI, M+H<sup>+</sup>) calculated for C<sub>18</sub>H<sub>23</sub>N<sub>6</sub>O<sub>4</sub> 387.1781; found 387.1777.

[α]<sub>D</sub>: -24 (*c* 0.20, H<sub>2</sub>O)

## SUPPLEMENTARY FIGURES

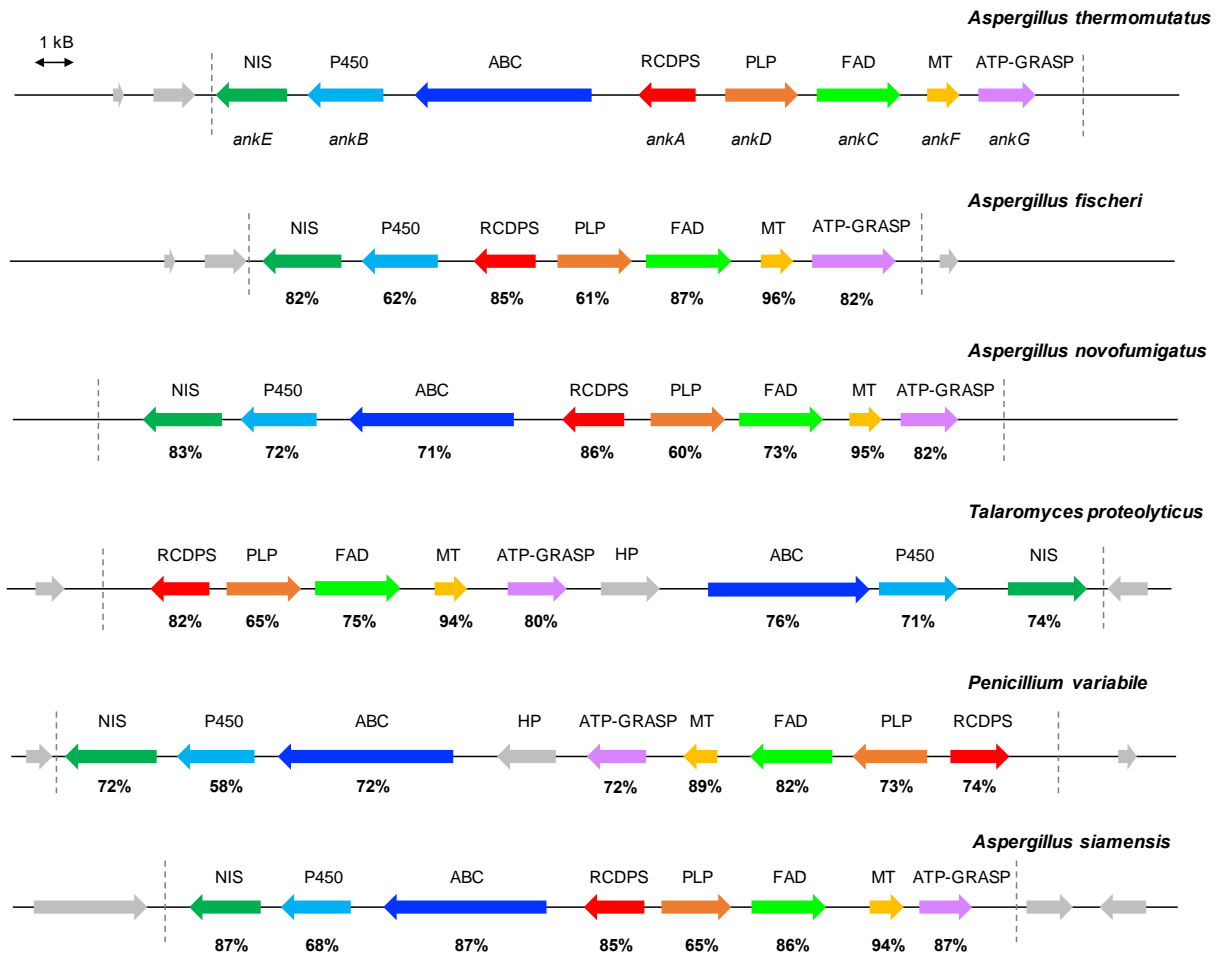

**Figure S1.** The *ank* cluster and homologous clusters from *Aspergillus thermomutatus*, *Aspergillus fischeri*, *Aspergillus novofumigatus*, *Talaromyces proteolyticus*, *Penicillium variable*, and *Aspergillus siamensis*. Seven biosynthetic genes from *ankA* to *ankG* are conserved in all of the clusters.



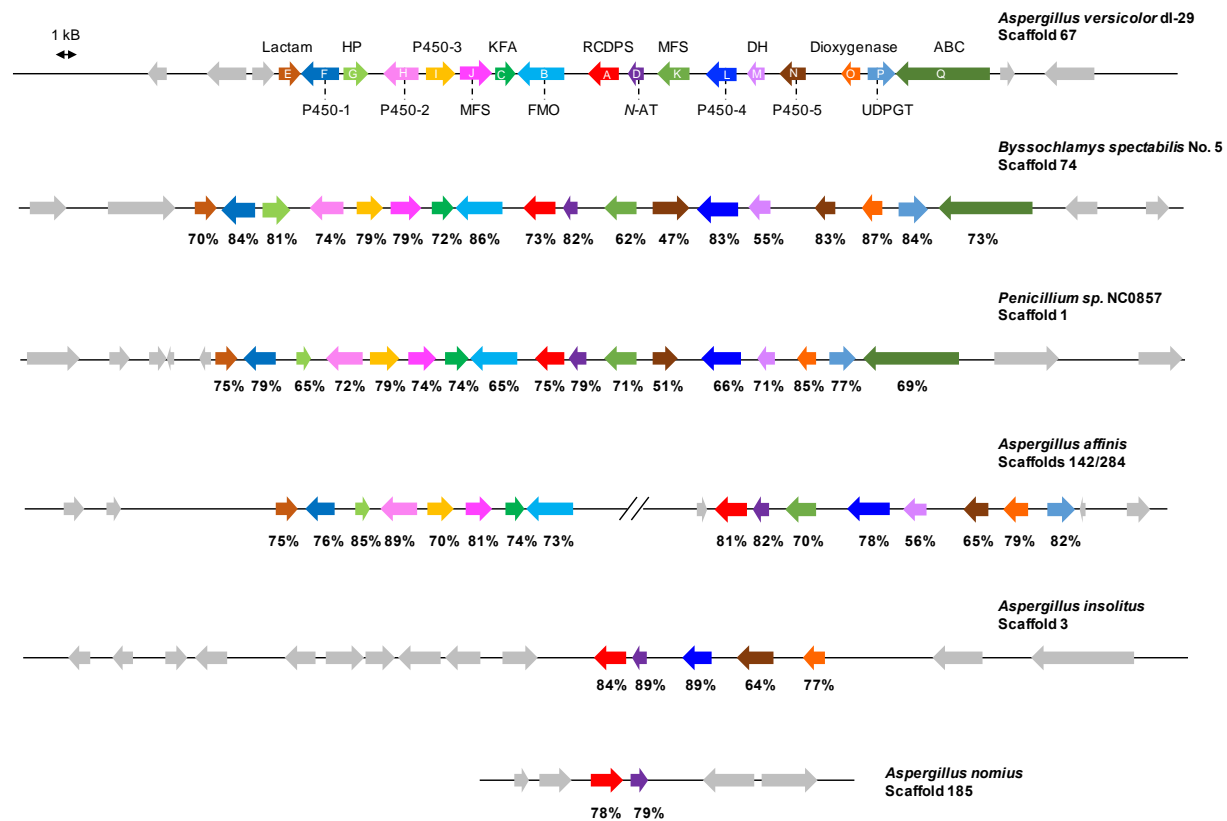

**Figure S2.** The *ava* cluster and homologous clusters in *Aspergillus versicolor* dI-29, *Byssochlamys spectabilis* No. 5, *Penicillium* sp. NC0857, *Aspergillus affinis*, *Aspergillus insolitus*, and *Aspergillus nomius*. Cluster genes are located on two scaffolds in *A. affinis*. Nearly all biosynthetic cluster genes are conserved in *A. versicolor* dI-29, *B. spectabilis* No. 5, *P. sp.* NC0857, and *A. affinis*.

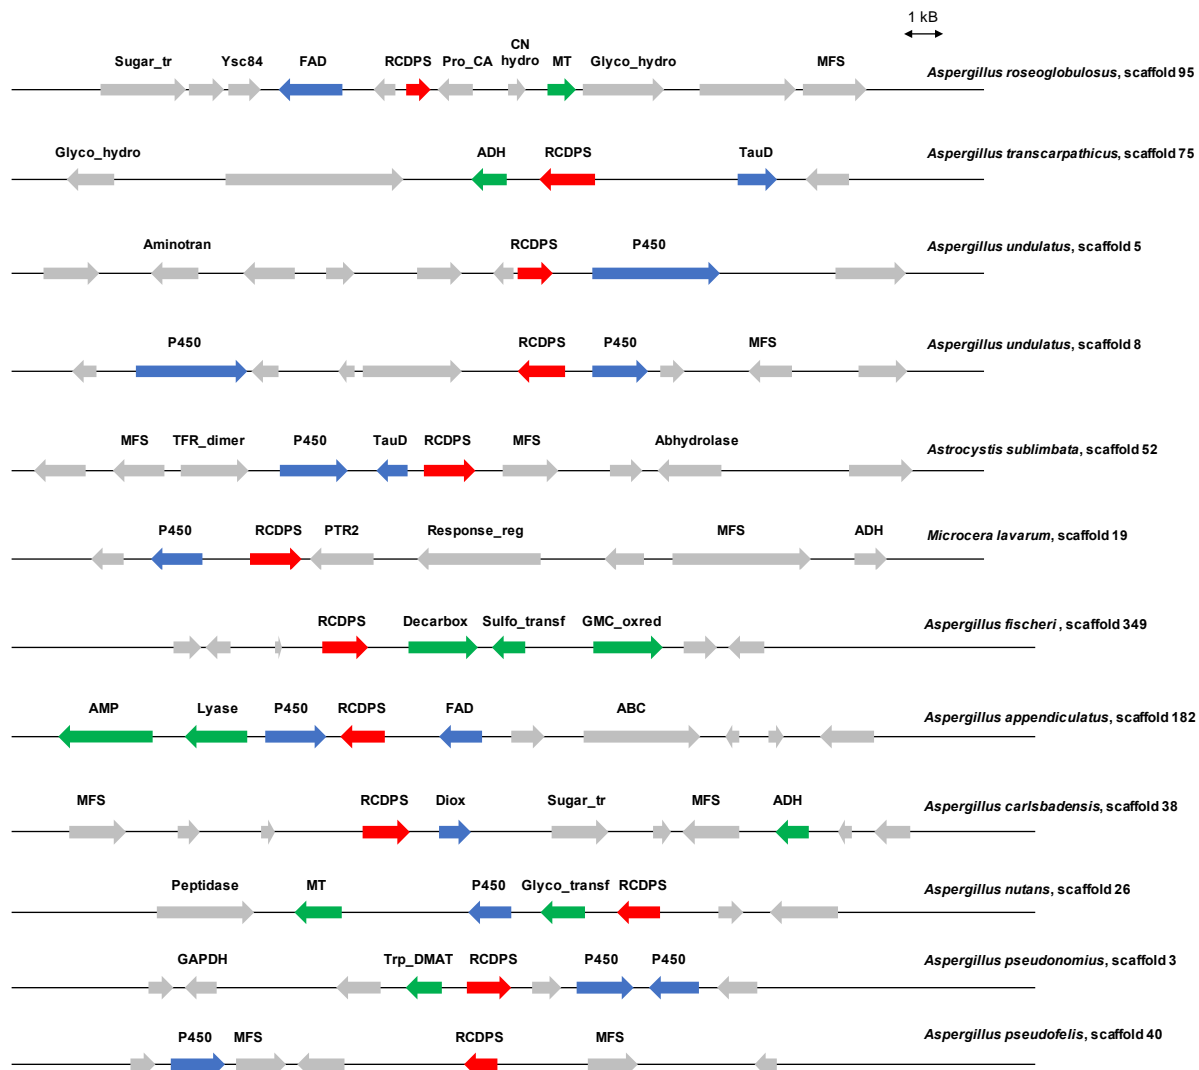

**Figure S3.** RCDPS homologs clustered with biosynthetic tailoring genes. RCDPS homologs are colored red, potential oxidative enzymes are colored blue, and other potential tailoring enzymes are colored green.

CLUSTAL O(1.2.4) multiple sequence alignment

```

A_versicolor_dI-29  MTATVQHTVKTEVCLRGDVASQPISDSKPPTWVAVLQQHE---YQSSVTYHKLDDNRLI  56
A_nomius            MMGAVQLPVEATEACLHDDAASRPISDSNT-VRVAVLRQHQ---YHSSVTYHRLDDNRLI  55
E_shearri          --MSIP-----TDIANLLIGEDA---KLSIHFDKIPLHNDA  31
A_thermomutatus    --MEDR-----IPVADLQHSAG---SLAAIAFH-----NI  25
A_montagnei        MVSISK-----SLVADICVGS---SPPTVRFVTLLENHDI  32
P_thymicola        --MSTQ-----YLLANLRNRPDGRPS---IDFGSLSARES  31
A_terreus          --MDVQ-----YVLADLQTGPESQSSQSSIHFDHMAFFYV  34
                   : * :
                   : :

A_versicolor_dI-29  -----PDVFGYSYLRDIAD-----QGKKQSTGKQHARVIQAYSKIHSLLSPPWKS  101
A_nomius            -----PGVVGYSYLRDIAD-----EGKKQSPSKQHARVIQAYSKIHSLLSPPREP  100
E_shearri          ----HHSQSKF-----YMLSTNRALRDHEEKEDDLKYLKGRQGAIRLNQLLNAPHLI  80
A_thermomutatus    EHCQTQTSSAILGYHLPHIGSEHSSSDNAEAAKYTKAFIKGRKRVAVKVANLINQKTI  85
A_montagnei        SNTTFPSLSGVLAQYGSLLQGPAGLQHVGLAQDQKYQHALTKGLKAVEKLGHFLDGPAM  92
P_thymicola        PVKMPHEITRLF---SSDYCTSTST-TLEABESEVYWKALSRNKRAAGILEHFLNGEQAA  87
A_terreus          SIERQHGLSGLV---SIVPCSTPTTIHYDEKDKKAYQKAWSRGRRFAALFENLLNGGKMA  91
                   . . . : : : . : :
                   . . . : : : . : :

A_versicolor_dI-29  SSIDSNTKTRENKQSP-----VILEDKRCAFIERLEPPPNSKADIVSTVFAQVNLQTP  154
A_nomius            GPIDSETKTREKKSSP-----VIVHDKRCAFIERLEPPPNSKADIVNTVFAQVNLRTP  153
E_shearri          KERESTA---QNEGKAVMRLGETAMVIDETFDA-----QPIHSHIW---NSFMSIEFRFP  129
A_thermomutatus    HPV-----PLRVTVGSGLVGGPPCEG-----HARLEGI--TWFEKIQFHQ  124
A_montagnei        SGDPVVLRCSSARSSSTLLEITDEITISGPPCAG-----AAREREGI--TSFHRMKFHL  144
P_thymicola        AHPSVY---LQDRARLRLCEAAILVGA PRGT-----ATRTRREGI--ASYDKMEFLFP  134
A_terreus          TKTSCS----LQQTPYLQLRDEALIVGSP LGT-----PTRTRREGI--SSFHNM EFNFP  138
                   : . : : : :
                   : . : : : :

A_versicolor_dI-29  TGPP-----LEQF--LSCRASNIKANDLK-NAAEGVRRPITISTGICLFSSRLLGFI  203
A_nomius            VGPP-----LDQF--VNCRSSNIKINDLK-DSANGLCRPITISTGICLFSSRLLGFI  202
E_shearri          QAD-----FTSLQYLQTSWKGLESGDTLYT-KEGTPFEEVSVIVSGVCLFNARLLEMS  181
A_thermomutatus    SLRP--EGNHSTASHYLHFSTPLAQIIPGAEGRTQPM DVVQDITLISGMCLWASRIIQSS  182
A_montagnei        KHVGCVQDVHETSSQMLHLSCDGLRSED TLFDFRGRWRSDHVTIVSGMCLFSDKIMRDA  203
P_thymicola        ESR-----QRKSIQMLHVSCP SLQPGATLLD-SHSGSVHDSITILSGMCLFTRKILNST  187
A_terreus          GAK-----PVSQMLHITCPGLRSEESLFD-KNGGALYDSVTVLTGMCLFTRKILDES  191
                   : . . : : : * : * : * :
                   : . . : : : * : * : * :

A_versicolor_dI-29  ---PTNGLSVSHDATETVVPPLPYTTVATFYLETCTRMAMTIAGLAVTA--STGGTAGS  258
A_nomius            ---PTNGLSTTDGATETVIPPLPYSADATFYLETCTARMAMTIAGLAVTA--GTGGTAGS  257
E_shearri          TTCPKSGGDV-----DLLKSSPTTYNELDYIARASSAIADVAAMNLRACEQDSG  232
A_thermomutatus    --MPRGQRLDV-----SRLSSKITLYEVEYLARAVPVIADLAAAL--SANNPYGP  229
A_montagnei        --VQGDGKLDV-----SKLSSQEP TLYELEI IARSSSAIADVASHIL-GKNGAAKP  251
P_thymicola        ---TTNGCLDG-----QKLRHMSPTLYEMECIARLSAIADVTLTQ-SNFGEDNH  234
A_terreus          ---VADGFLDT-----RKLLDMQLTLYEVERIAGLSSAIADIAALVL-SRYDGKCH  238
                   . * * : : * : :
                   . * * : : * : :

A_versicolor_dI-29  RPIVVRLDVPLQYYCYPLELLEAGLVSWEYVEEFRLVDRRHQVATLLKDTIIEVRR  318
A_nomius            RPIVVRLDVPLQYYCYPLELLOAGLVSWKYVQEFRLVDRRHQVAGLLKDTITHEVLR  317
E_shearri          QRLTIKLDIPSWHYFHTVATK FVSKQCSNTEVLQWMDAVDQRHDQIGQTFVEAIRYGLEQ  292
A_thermomutatus    TPLNIRLDIPSFHYHYSLEERLRDGCCTFPEALQWMAVEKRRHHQLSRVFCRLIDHLSR  289
A_montagnei        IPLEIVLDAPSWHYFQVVHGNLASGHCTPAEALDWLQAVELRCEQVTVFENSVRHEMGL  311
P_thymicola        PAVNIDC-----IKSDACSL EEAIDWTEAIKLRQQLASV LKKA VWHELGQ  280
A_terreus          KPVNIILDLP TWHYYQSVEDQLQHRGYPKCEVMDWIEAITLRSQQLAGLLKSAVHLEDR  298
                   : : : . . * : * * : : :
                   : : : . . * : * * : : :

A_versicolor_dI-29  RNCDVQ-----VDVTSGTIAATQLLR LRCVLGRRKIPSVNDMLFVLSWIGPYQAAREFL  372
A_nomius            RGGDIQ-----VEVTAGTIAATQLLR LRSVDFRMELPSVDDILFVLKVVGPYQAAREFL  371
E_shearri          RGIHDS--TSYGIGMTRSNTNAAILIR-TAIEHEEVP SLDAILAALD--SEEDGWKRFY  347
A_thermomutatus    RWVGTPHRRKLDVQVSP LADLVFQLICD-SLANSVLPDVDDILQI-V--QTEDTWWRFY  345
A_montagnei        RGVPA---GFYHILAAPGTAGVGT SIRQ-ALTSGMVPDIADCMDAIC--EVEGERWAMFY  365
P_thymicola        RQVAHK-STLKAIQISPESTVVD ELIKE-TLQRGHQPRLDDILHALS--GTPHKI-----  331
A_terreus          RGVSSS-QRLYDIQISPGSALVDDAFRE-TLKYENLPCLDNILEALS--GSEDSWQQFY  354
                   * : : : . : : * : :
                   * : : : . : : * : :

```

```

A_vericolor_dI-29  AIVDDCQRPKDLRS LALMAYVFVMPALQQATTKTKTPH----- 412
A_nomius          DILDDCQRPKDLRS VALMAYVFVMPALHQIATKS--LH----- 409
E_shearri        EMIPVKERPSNLDQLGYLYVYEAIRPSLAERPAPVPLESD-----QTKKANL 395
A_thermomutatus  SLVPENEKVTFDRALSYLFYVYQVLRPALEQTHVNTTE----- 383
A_montagnei      SLIPEKDRPCDFRSLGNLFYIYEVVVPALAAKNGSTAAELEVSGPNSALDDSSSSGHSDI 425
P_thymicola      -----SGFS----MYFKFRPALLKAIPCQEAPS--CKA-----PACEQPNL 366
A_terreus        SLLPERDRPQSIKDL SYLFYIFEVVVRPAVLAGIQSGNQPTPTQSA DMDSTVSHRQQQPAS 414
                  ..      ::      . *::

A_vericolor_dI-29  ----GKGEESGRPLLIQVDDIAEWRIFDRAEMLLKRFKHR--QHGLDPLLVGVPSPRI 466
A_nomius          ----GNG-EKSGRPLLIQVDDIAEWRIFDHAEKLLKRFKER--QHGFYPLLVGVPSPRI 462
E_shearri        --SKKALKKRRKPRRLIISVDDSAERRIYSRAQRVLSKIRQC-S-EKPETYLVESVVCRRF 451
A_thermomutatus  -----GDEATSKLLISVDDAFERRIYSRSQKLLKKLRASLPASAAVPHLLEVYLCRRI 436
A_montagnei      LDSALHLKANVERPLIMSIDDRAERKIYSKAQAFIKKIRRA-PQIPSHPLLELYSARRV 484
P_thymicola      RR--GQRQCLPQLPLIISLDDRAERKIYSQAHSLLLRLRSR-SNQLVNP TLVQLYMLRRV 423
A_terreus        SRSYTSKQNQMPRPLVISVDDPSERKLYSKAHSFFLRLPKN-PIYPADPTLVQVYTRRV 473
                  *:::* * ::::.. .: ::          *: : *

A_vericolor_dI-29  FTSEDQGRSTLFLHDPGLKISQTRPPSSGG-----DSEDHSCVVGPLDIIG 512
A_nomius          FTSEDQGRSTLFLHDPGLKILQTRSPSSN-----SEEGSCVVRPLDIIG 506
E_shearri        LVNGNEDRARLGRLDPLPDIPVRTG-----FHHEPMLPLDVVR 489
A_thermomutatus  FINSNETGSNLYLDDPSPPEFVLRRLCQGLAPEGKQELVRAQDRHNTRPETIKLDAFVVE 496
A_montagnei      FINGNTGDSLYWNDSSPHLRMNT-----TAGSFELEAFGVIR 523
P_thymicola      YIDGNKDGQRLYWHDPSVPLPLEGTKEQQR-----RDARNHDHHRRELQQT DILT 474
A_terreus        FVDGNRKGERLYRNDPSPVMPELSNGKLYGD-----GGDAGYSKYARELQQMDFIA 524
                  . : * *          : ..

A_vericolor_dI-29  QIYGAEVQDTLMRLIIERGLSPEDEFELD 541
A_nomius          QIYGREVQDTLGQLTRKHGLSAADGPESD 535
E_shearri        QLYGNKSALNLQRWLQEAGLSV----- 511
A_thermomutatus  GLYGSHIAEVLKDLFAEVGLGA----- 518
A_montagnei      NLYGNDCAQNLQRWFSEAGVNVSGHT--- 549
P_thymicola      ELYGRECSANIQQWFKEAGLC----- 495
A_terreus        KLYGAECAANIQRWSKEVGLC----- 545
                  : ** . : : * :

```

**Figure S4.** Clustal omega (1.2.4) multiple sequence alignment of RCDPS homologs with activity verified *in vivo*. Conserved residues are starred.

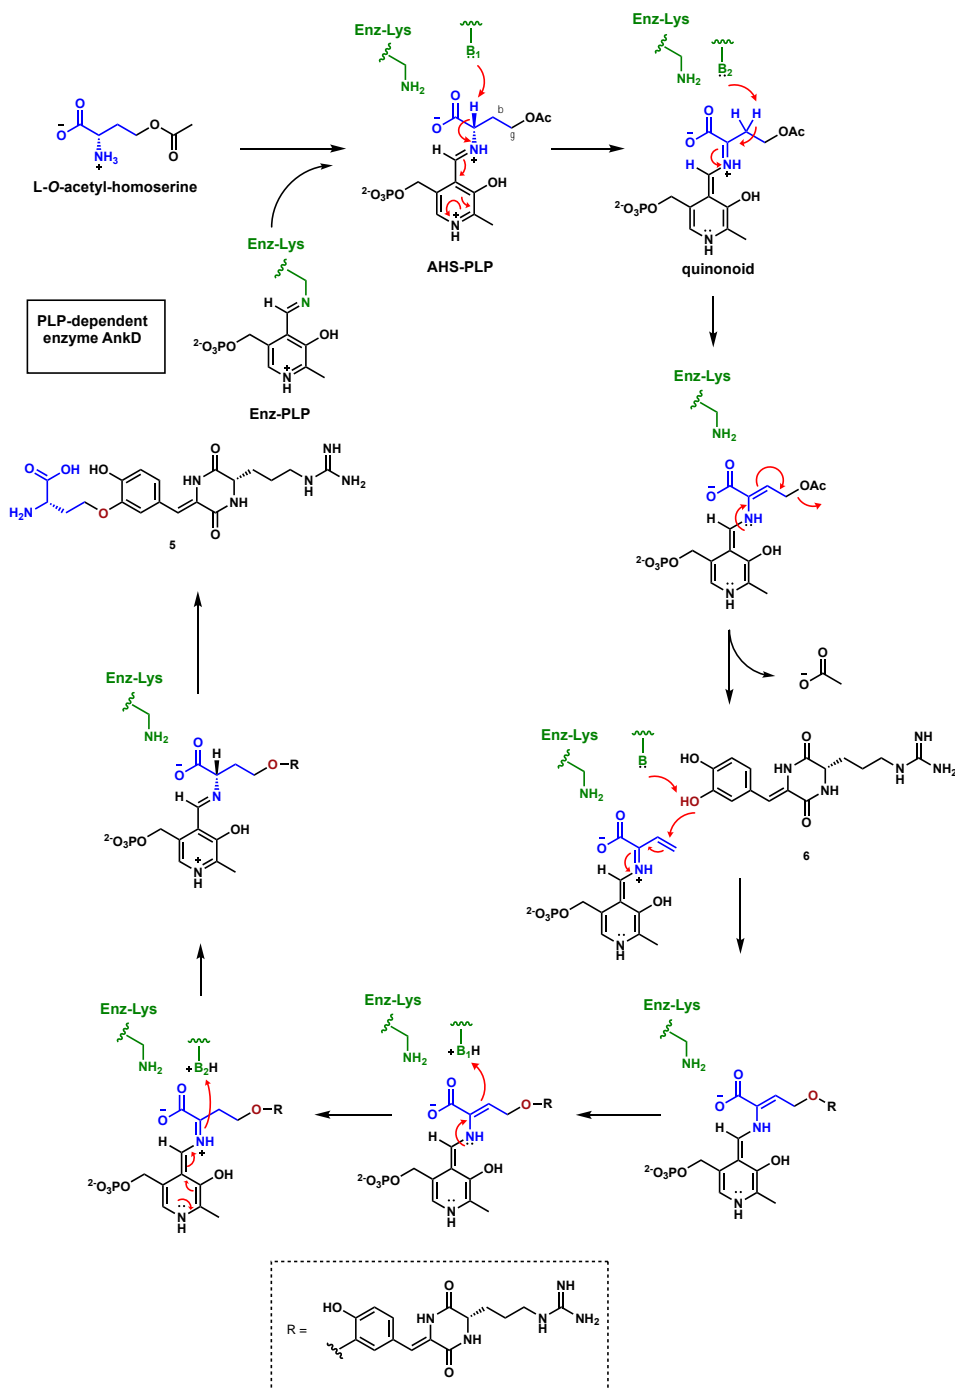

**Figure S5.** Proposed mechanism of PLP-dependent enzyme AnkD from L-O-acetyl-homoserine and **6** to afford **5**.

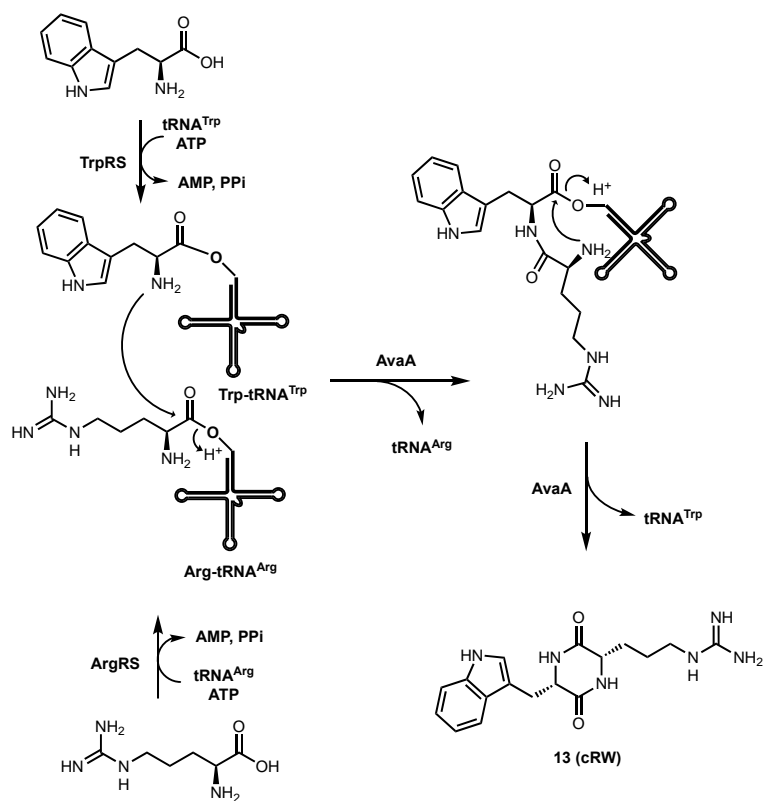

**Figure S6.** Proposed tRNA-dependent mechanism of AvaA to synthesize **13** from L-Trp and L-Arg. Since the order of amide bond formation is unknown, it is also possible the first amide bond is formed between the amino group of Arg and carboxylate group of Trp.

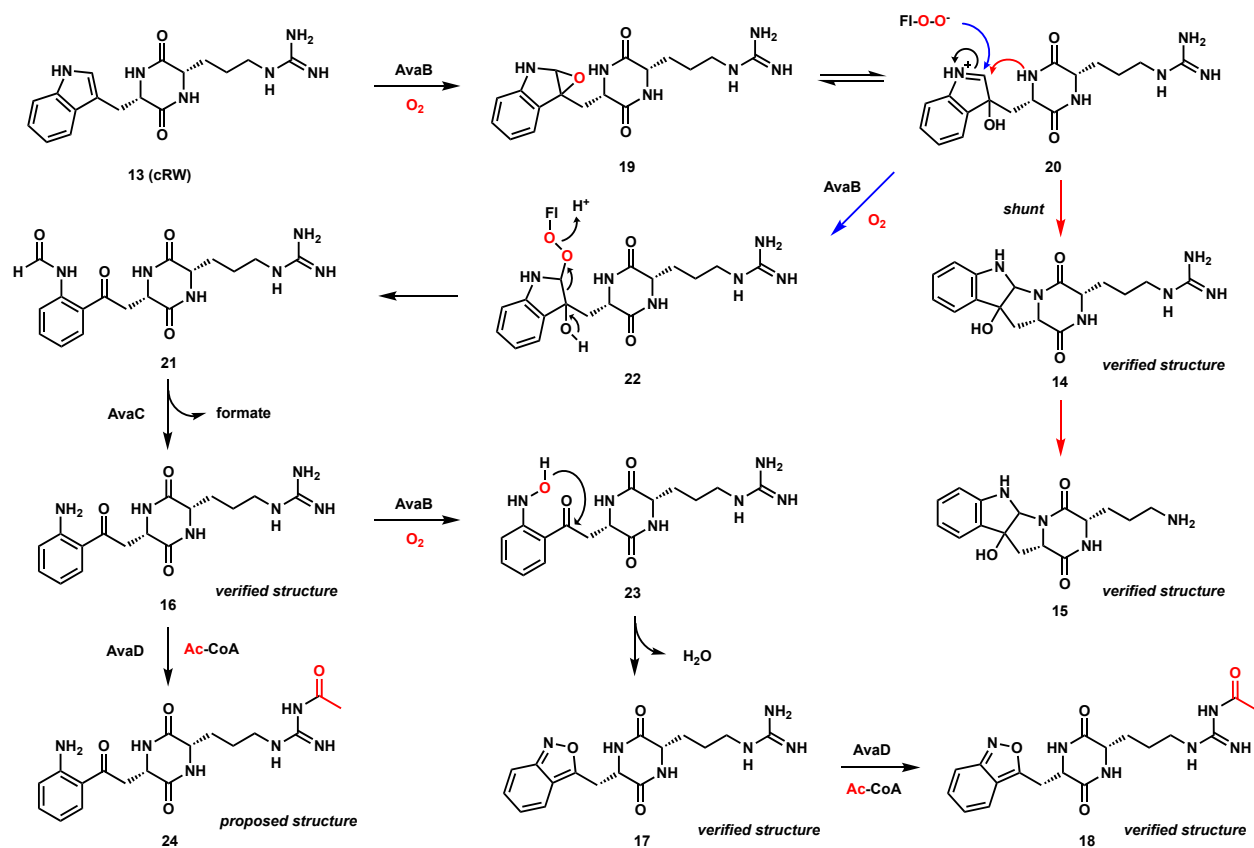

**Figure S7.** The proposed mechanism for the FMO AvaB. We propose a multifunctional role of AvaB. A FI-C4a-OO<sup>-</sup> species in AvaB attacks the iminium intermediate **20** to give the adduct **22**, which can then undergo C-C bond cleavage with ejection of FI-C4a-OH to give the cyclo-Arg-formylkynurenine DKP **21**. Hydrolysis of the formyl group can be catalyzed by AvaC, as well as endogenous KFA, to yield **16**. Oxidation of the aniline ring to *N*-phenylhydroxylamine **23** by AvaB can lead to an isoxazoline intermediate that can dehydrate to form **16**. This pathway therefore requires AvaB to perform three different oxidation reactions, which has precedence in fungal flavin-dependent enzymes.<sup>6</sup> The formation of **14** is therefore a shunt product as a result of facile intramolecular cyclization. At this point, we cannot exclude endogenous IDO-like enzyme catalyzing the indole cleavage directly from **13** to **21**. **16** and **17** can then be acetylated by AvaD to afford **24** (proposed based on HRMS (ESI, M+H<sup>+</sup>) calculated for C<sub>18</sub>H<sub>25</sub>N<sub>6</sub>O<sub>3</sub> 389.1937; found 389.1924) and **18**, respectively (Fig. S21).

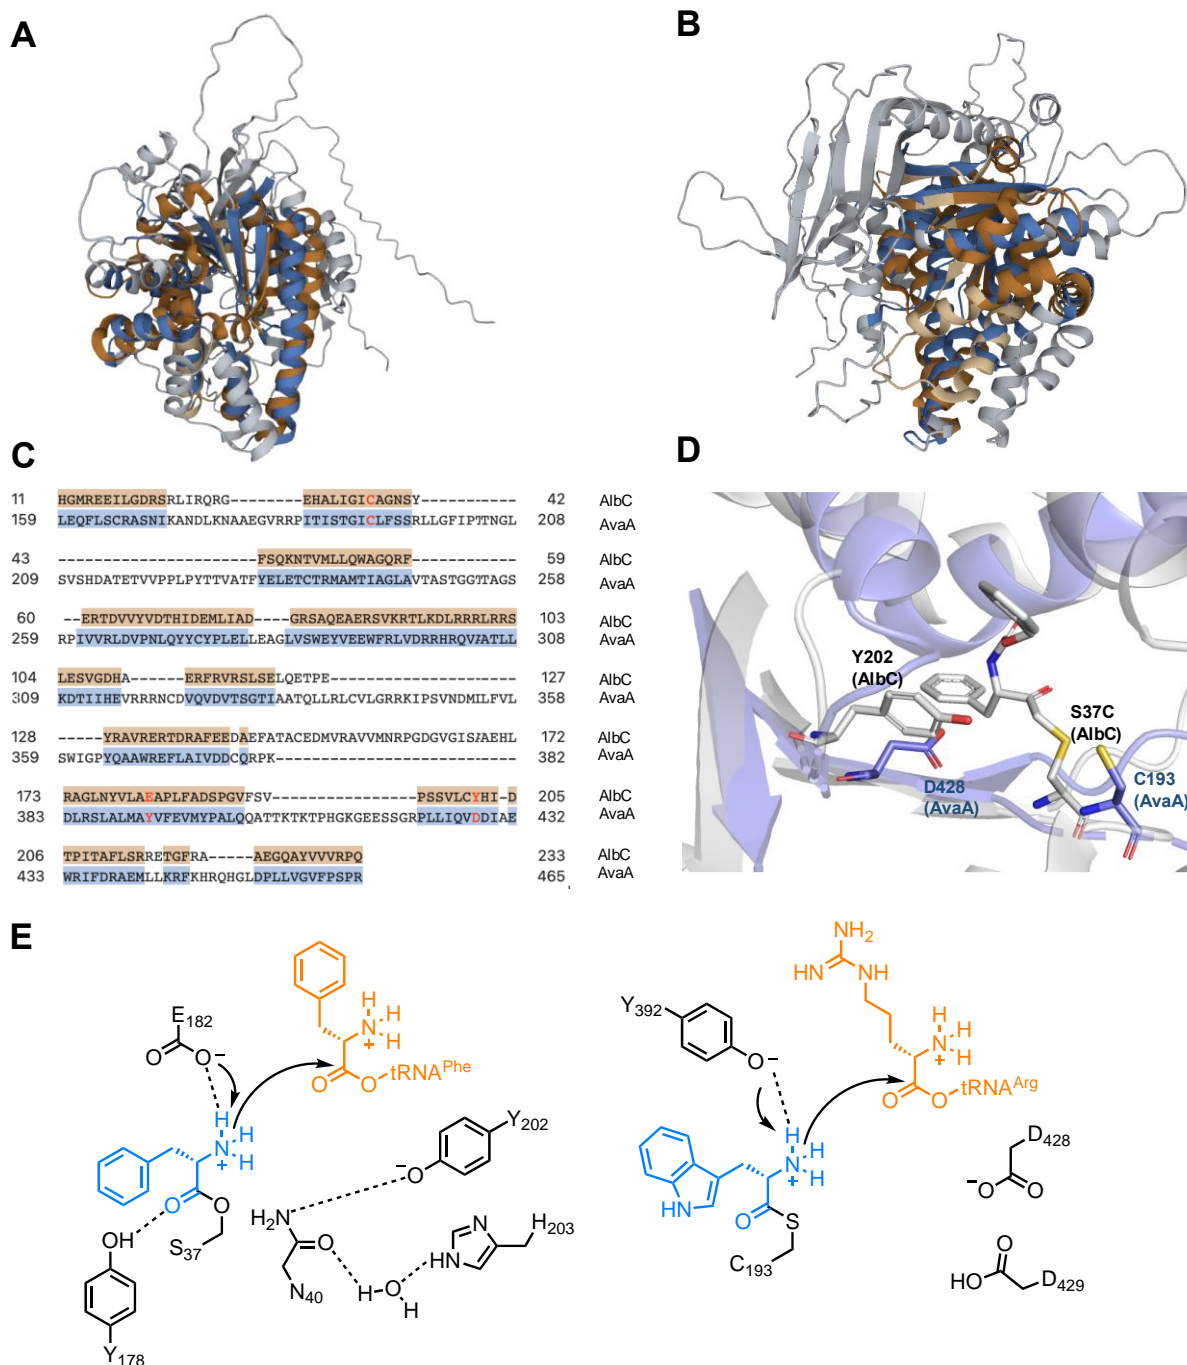

**Figure S8.** RCSB PDB pairwise structural alignment of the predicted structure of AvaA to the bacterial CDPS AlbC S37C mutant. The AlphaFold<sup>7</sup> structural prediction of AvaA is colored blue and AlbC S37C mutant (4Q24)<sup>8</sup> is colored brown. The dark blue and dark brown portions correspond to regions with similar structure, whereas the gray (AvaA) and beige (AlbC) correspond to regions with low similarity. (A) Orientation that highlights the similar core Rossmann fold. (B) Orientation that highlights the additional folds in AvaA not present in AlbC. (C) Sequence alignment from the RCSB PDB pairwise structural alignment between AlbC and AvaA. Aligned active site residues are colored red. (D) Overlay of AlbC S37C mutant (gray)



and AvaA model (purple) generated by AlphaFold. C193 in AvaA aligned to S37C in AlbC, while D428 aligned to Y202 in AlbC. S37 and Y202 are the catalytic residues in AlbC. In the structure of AlbC S37C (4Q24), the cysteine is covalently modified with a substrate analogue which can be seen in the enzyme active site. **(E)** Comparison of active site architecture of AlbC and AvaA. Using cysteine rather than serine for acyl intermediate formation in AvaA is likely to provide advantages such as kinetic enhancement, as well as reducing competing solvolysis by bulk solvent.<sup>9,10</sup> This has been demonstrated in thioesterases of polyketide synthases and NRPSs,<sup>9,10</sup> exemplifying a strategy of convergent evolution across different enzymes. Y392 in AvaA, equivalent to E182 in AlbC, may deprotonate the positively charged amino group of the acyl acceptor in preparation for formation of the first amide bond. Given the aligned position of D428 and Y202, it is likely that once the dipeptidyl intermediate forms, D428 is responsible for deprotonating the positively charged amino group of the acyl donor to attack the C193-thioester intermediate and form the diketopiperazine ring. The exact mechanism of RCDPS requires X-ray crystal structure validation.

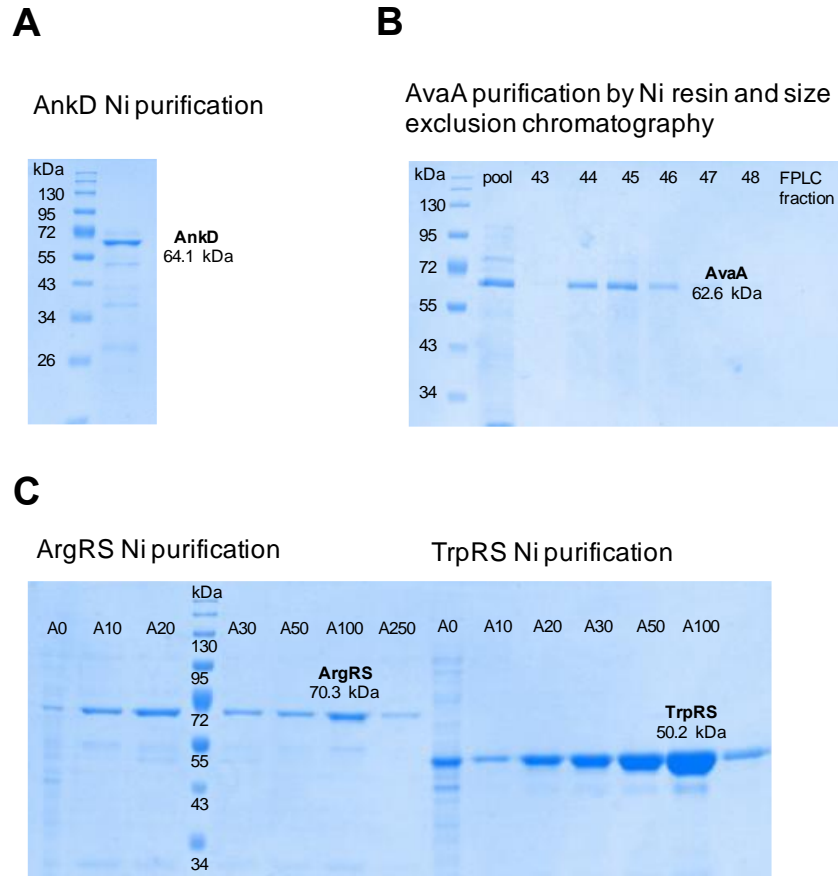

**Figure S9.** SDS-PAGE (12%) analysis of (A) AnkD, (B) AvaA, (C) Yeast ArgRS and TrpRS expressed and purified from *E. coli* BL21(DE3).

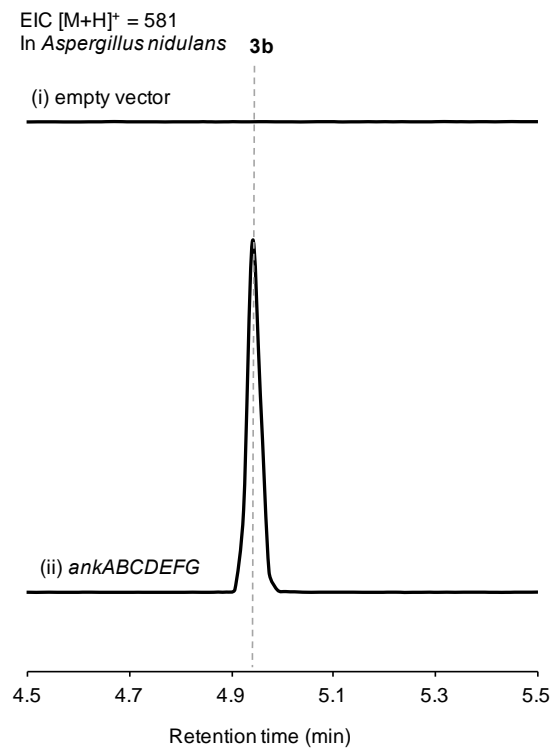

**Figure S10.** QTOF analysis of extracts from expression of *ankA-G* in *A. nidulans* showing production of compound **3b** (MWT = 580) compared to the empty vector control, retention time 4.5-5.5 min. Ion-extracted QTOF traces ( $[M+H]^+ = 581$ ) are shown.

EIC  $[M+H]^+ = 318, 334, 435$   
In *Aspergillus nidulans*

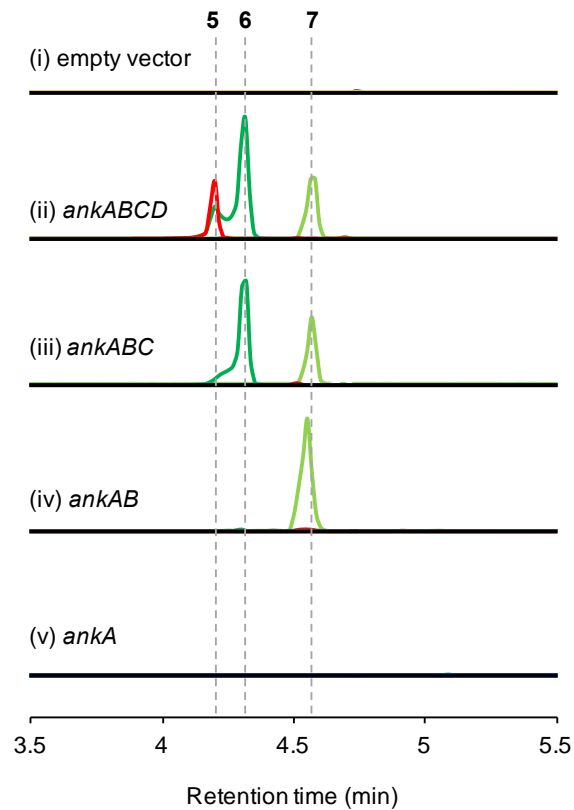

**Figure S11.** QTOF analysis of extracts from the expression of *ankaA-D* in *A. nidulans*. Traces include *ankABCD* (ii), *ankABC* (iii), *ankAB* (iv), *ankA* (v), and the empty vector control (i), retention time 4.5-5.5 min. Ion-extracted traces correspond to the  $[M+H]^+$  for **5** ( $[M+H]^+ = 435$ ), **6** ( $[M+H]^+ = 334$ ), and **7** ( $[M+H]^+ = 318$ ).

EIC  $[M+H]^+ = 334, 435$   
*In vitro* reaction with purified AnkD, 30 min incubation

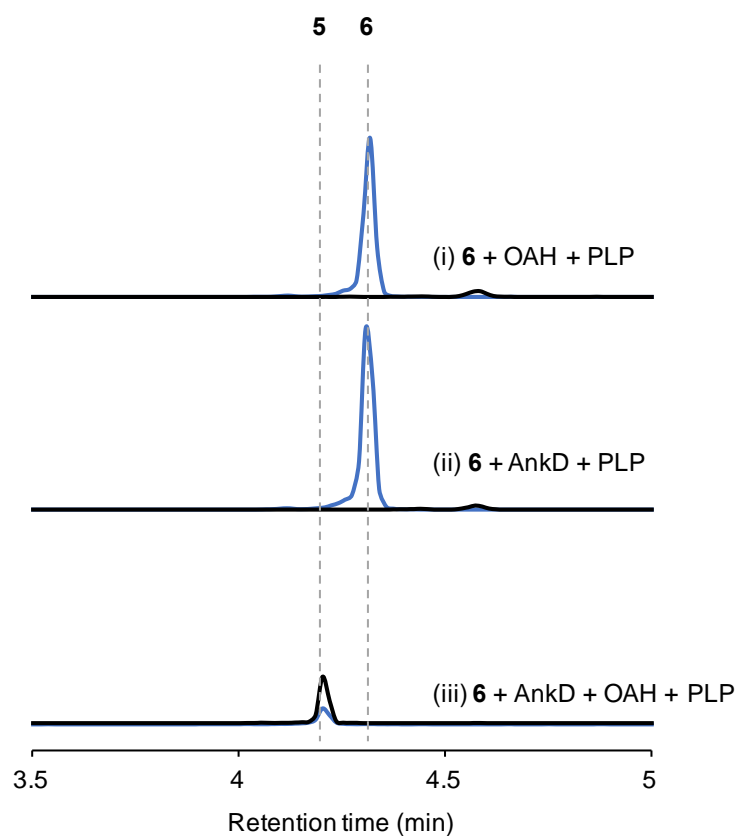

**Figure S12.** QTOF analysis of the extracts from AnkD *in vitro* reactions. Reactions include **6** and (i) O-acetyl-homoserine (OAH) and PLP, (ii) purified AnkD and PLP, and (iii) purified AnkD, OAH, and PLP. Ion-extracted traces correspond to the  $[M+H]^+$  for **6** ( $[M+H]^+ = 334$ ) and **5** ( $[M+H]^+ = 435$ ). The reactions were incubated at room temperature for 30 minutes.

In *A. nidulans*  
EIC  $[M+H]^+$  = 270, 272, 286, 254, 320, 343

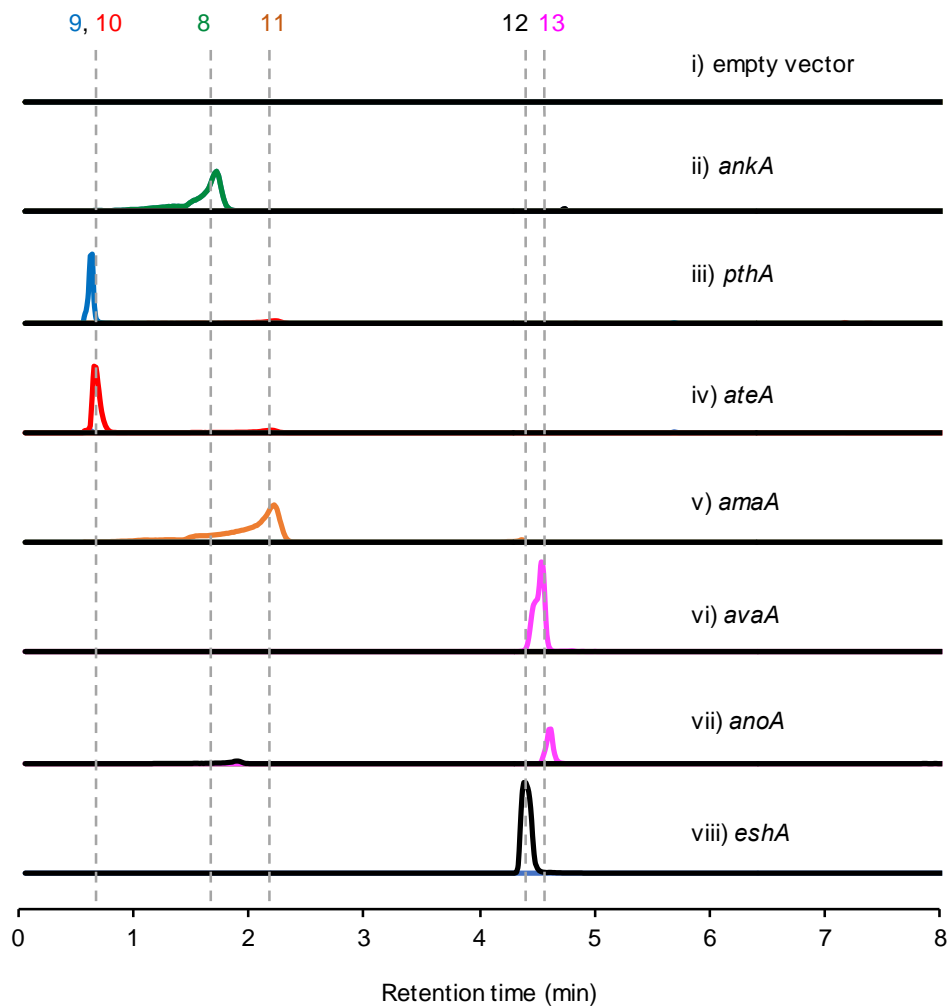

**Figure S13.** QTOF analysis of extracts from expression of *ankA*, *pthA*, *ateA*, *amaA*, *avaA*, *anoA*, and *eshA* in *A. nidulans* (ii-viii) compared to the empty vector control (i). Ion-extracted traces correspond to the  $[M+H]^+$  for **8** ( $[M+H]^+ = 320$ ), **9** ( $[M+H]^+ = 272$ ), **10** ( $[M+H]^+ = 286$ ), **11** ( $[M+H]^+ = 254$ ), **12** ( $[M+H]^+ = 270$ ), and **13** ( $[M+H]^+ = 343$ ).

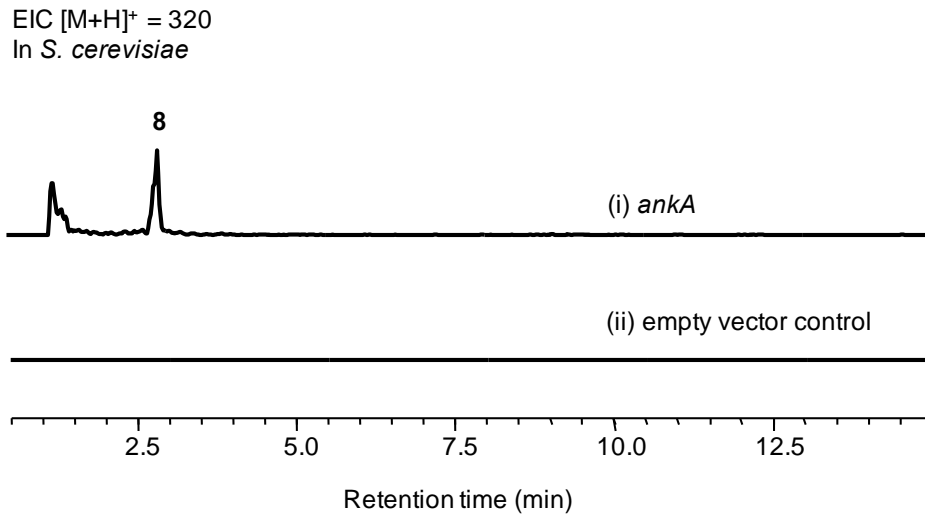

**Figure S14.** LC-MS analysis of extracts from expression of AnkA in yeast (i) compared to the empty vector control (ii). Ion-extracted traces correspond to the  $[M+H]^+$  for **8** ( $[M+H]^+ = 320$ ).

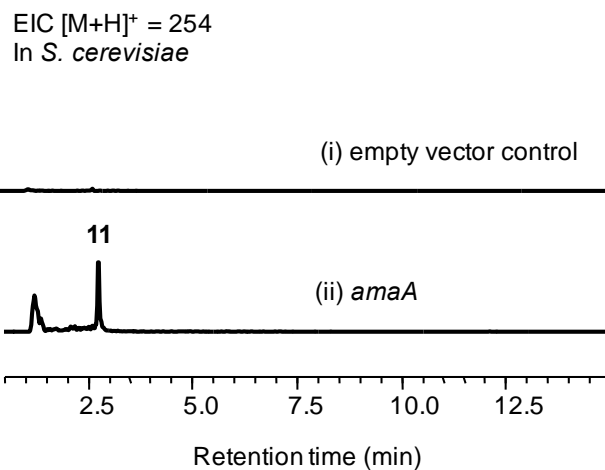

**Figure S15.** LC-MS analysis of extracts from expression of AmaA in yeast (ii) compared to the empty vector control (i). Ion-extracted traces correspond to the  $[M+H]^+$  for **11** ( $[M+H]^+ = 254$ ).

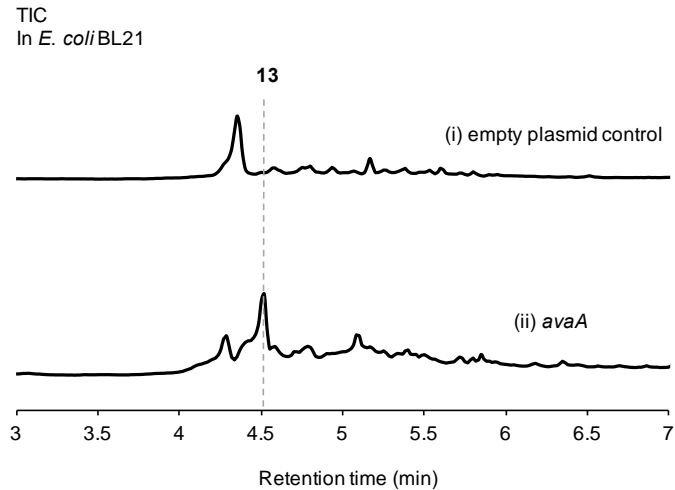

**Figure S16.** QTOF analysis of the extracts from expression of *avaA* in *E. coli* BL21 (ii) compared to the empty plasmid control (i). The total ion count (TIC) trace is shown.

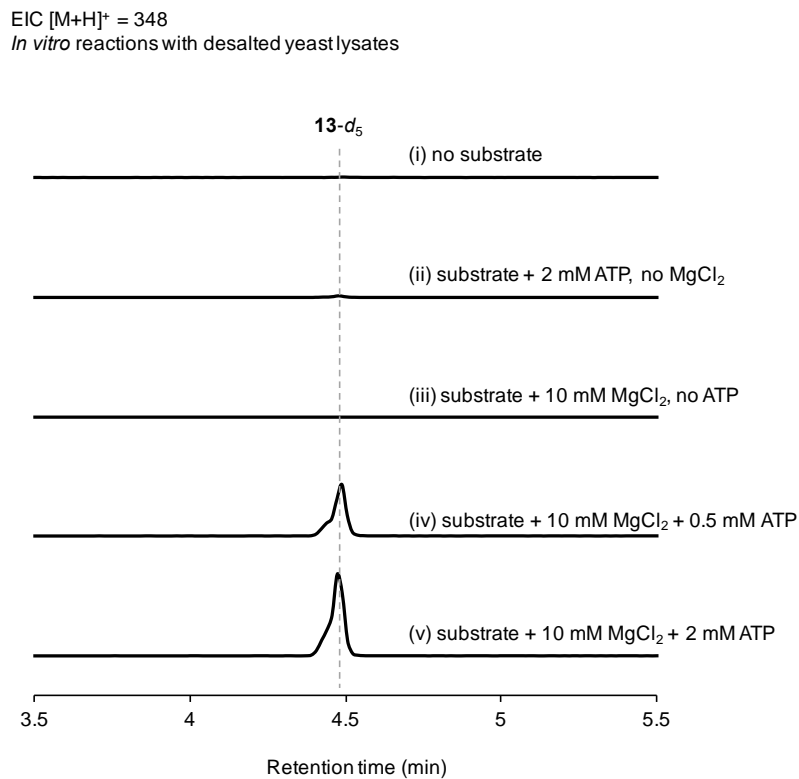

**Figure S17.** QTOF analysis of the extracts from *in vitro* reactions with desalted yeast lysates with (i) no substrate or cofactors, (ii) 5 mM L-Arg, 5 mM Trp- $d_5$ , 2 mM ATP, no  $MgCl_2$ , (iii) 5 mM L-Arg, 5 mM Trp- $d_5$ , 10 mM  $MgCl_2$ , no ATP, (iv) 5 mM L-Arg, 5 mM Trp- $d_5$ , 0.5 mM ATP, 10 mM  $MgCl_2$ , and (v) 5 mM L-Arg, 5 mM Trp- $d_5$ , 2 mM ATP, 10 mM  $MgCl_2$ . Ion-extracted traces correspond to the  $[M+H]^+$  for **13** with incorporation of Trp- $d_5$  ( $[M+H]^+ = 348$ ).



EIC  $[M+H]^+ = 343$   
Expression of AvaA in *S. cerevisiae*

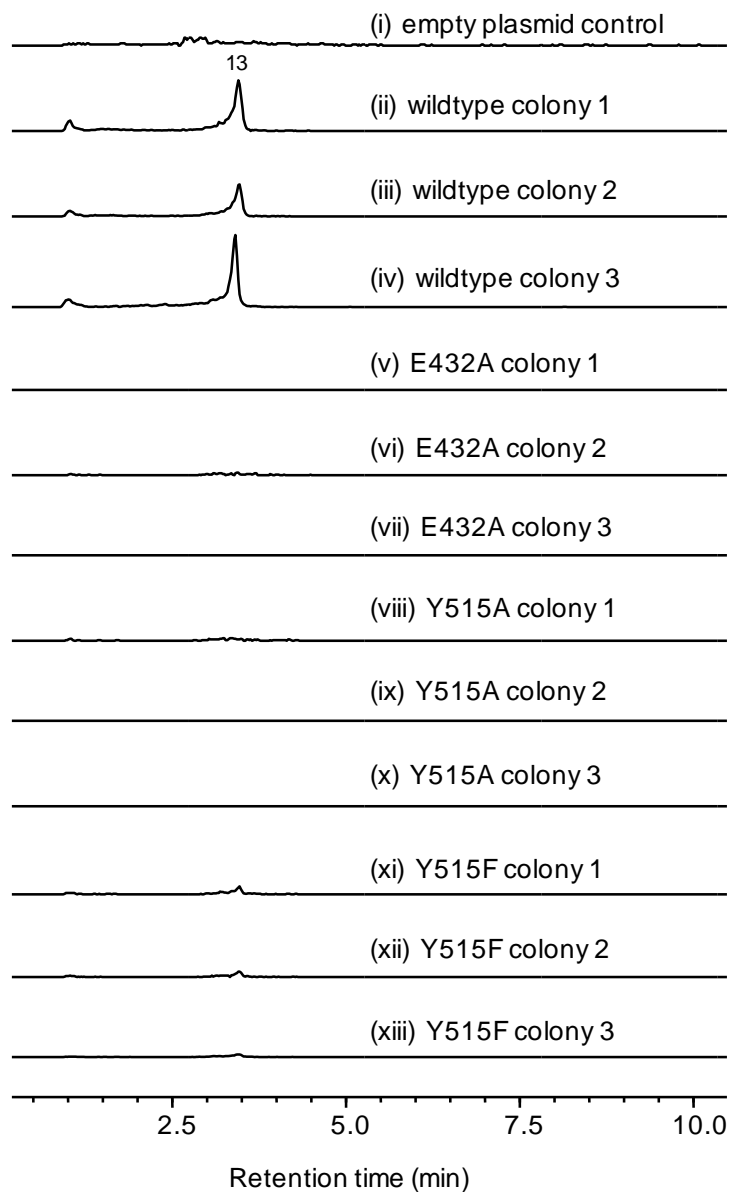

**Figure S18.** LC-MS analysis of the extracts from yeast expression of AvaA mutants E432A, Y515A, and Y515F (v-xiii) compared to the empty vector control (i) and wildtype AvaA (ii-iv) in biological triplicate. Ion-extracted traces correspond to the  $[M+H]^+$  for **13** ( $[M+H]^+ = 343$ ).

A EIC [M+H]<sup>+</sup> = 343  
Expression of AvaA In *S. cerevisiae*

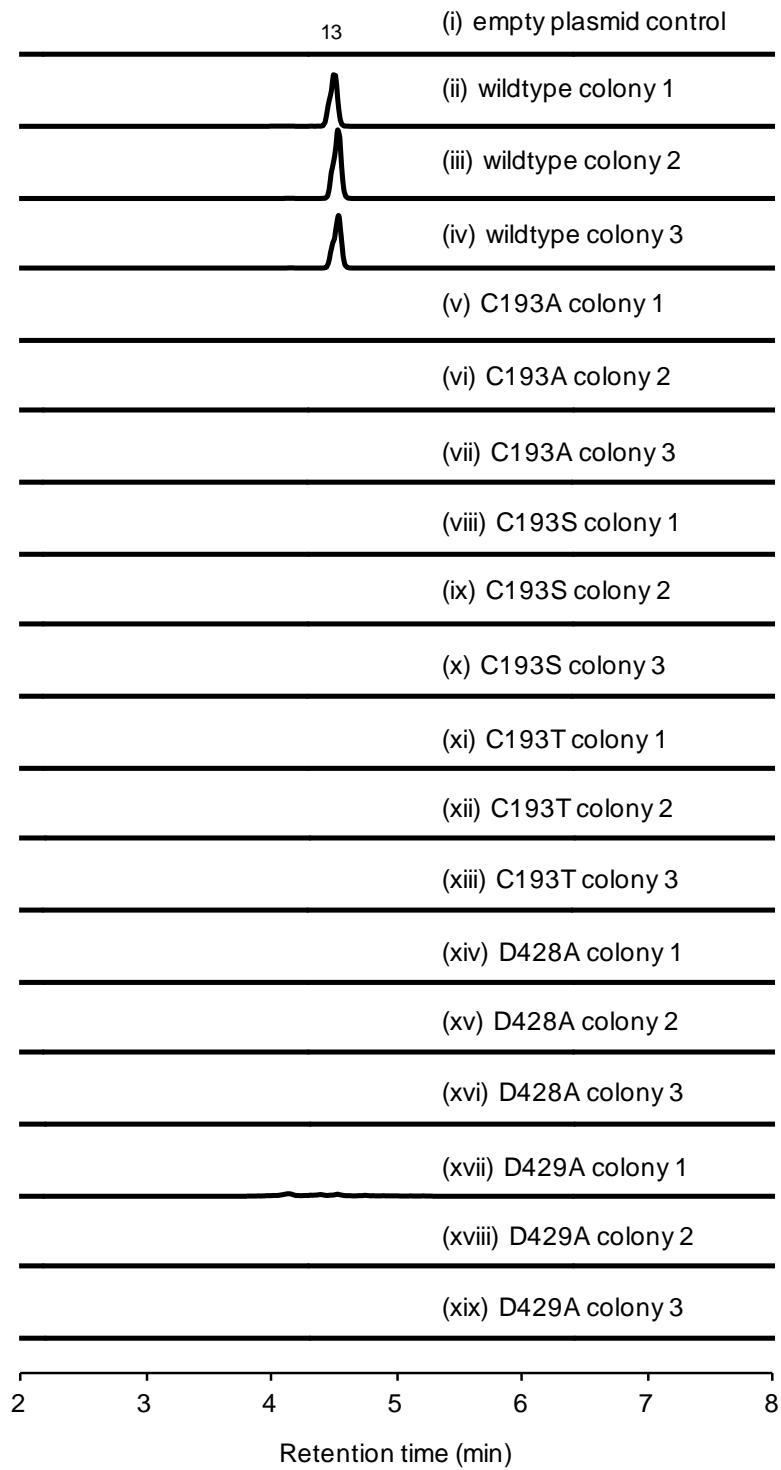

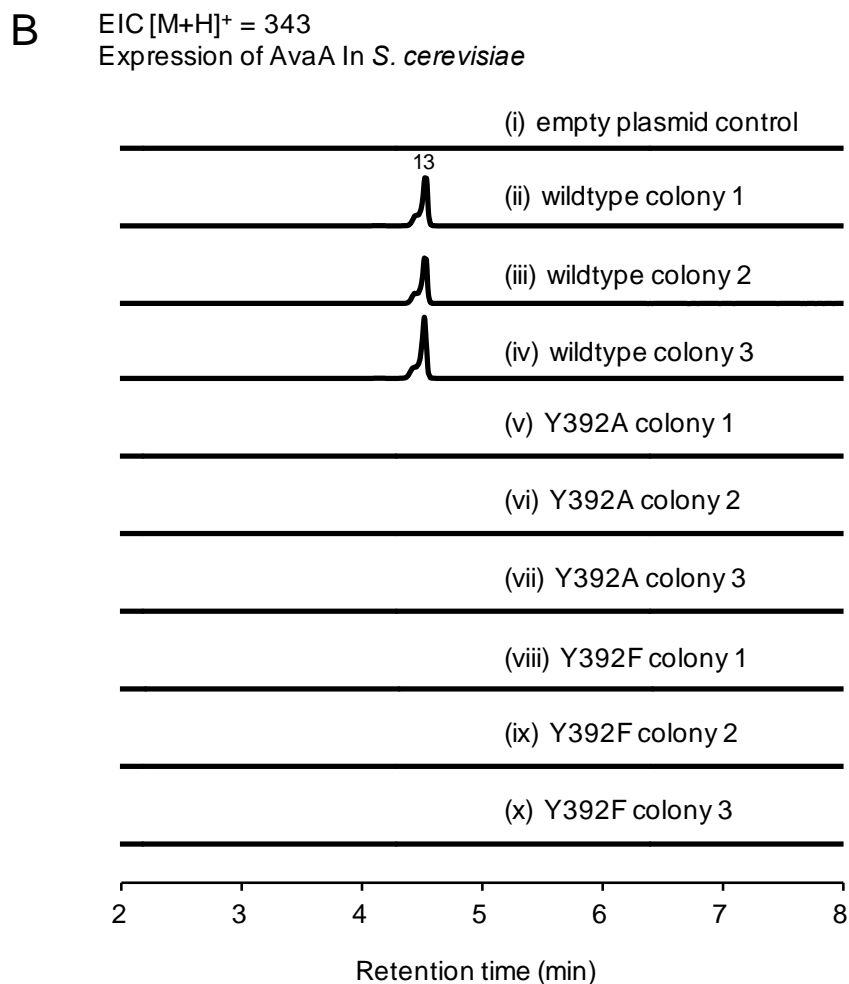

**Figure S19.** QTOF analysis of the extracts from yeast expression of AvaA mutants C193A, C193S, C193T, D428A, D429A, Y392A, and Y392F (**A**: v-xvi, **B**: v-x) compared to the empty vector control (i) and wild type AvaA (ii-iv) in biological triplicate. Ion-extracted traces correspond to the  $[M+H]^+$  for **13** ( $[M+H]^+ = 343$ ).

EIC  $[M+H]^+ = 457$   
Marfey's analysis of compound **13**

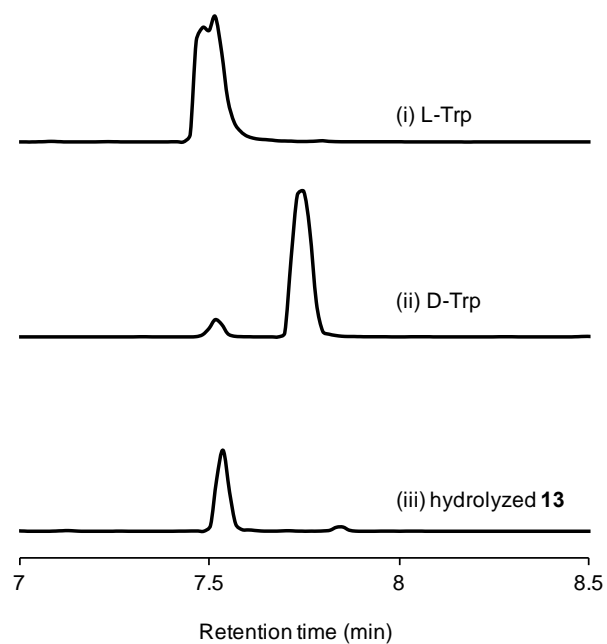

**Figure S20.** Marfey's analysis to determine the stereochemistry of Trp in compound **13**. Marfey's reagent was used to derivatize (i) L-Trp, (ii) D-Trp, and (iii) hydrolyzed **13**, and the reaction products were analyzed by QTOF, indicating **13** contains L-Trp. Ion-extracted traces correspond to the  $[M+H]^+$  for derivatized Trp ( $[M+H]^+ = 457$ ) as reported in ref <sup>11</sup>.

EIC  $[M+H]^+ = 317, 343, 345, 347, 359, 387, 389$   
In *Aspergillus nidulans*

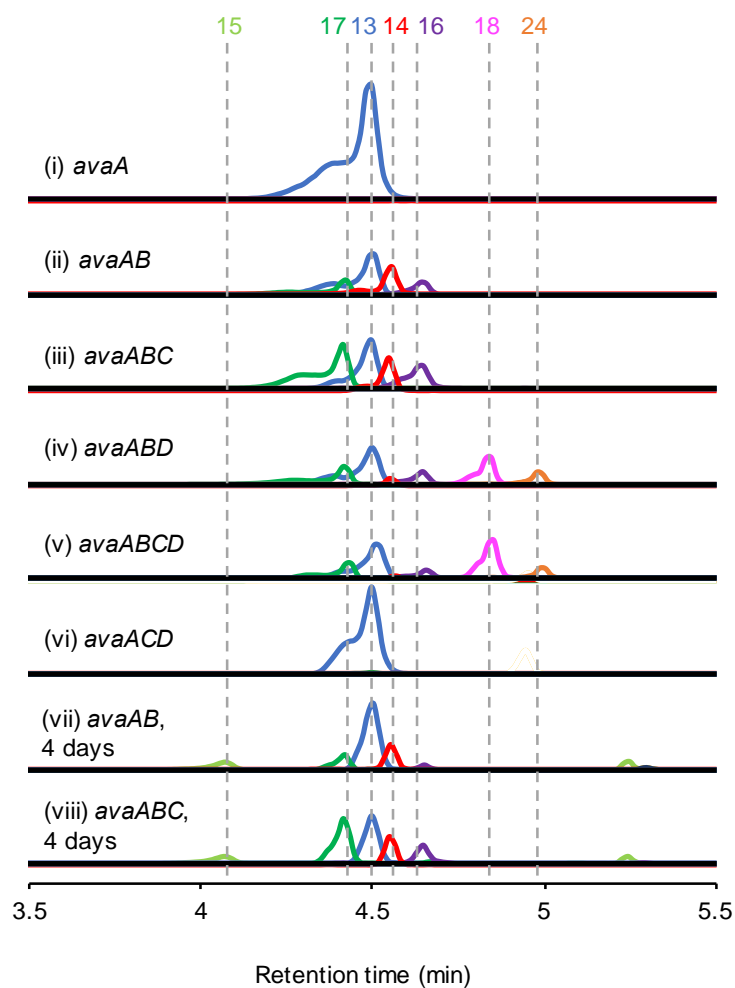

**Figure S21.** QTOF analysis of extracts from expression of *ava* pathway genes in *A. nidulans*. Ion-extracted traces correspond to the  $[M+H]^+$  for **13** ( $[M+H]^+ = 343$ ), **14** ( $[M+H]^+ = 359$ ), **15** ( $[M+H]^+ = 317$ ), **16** ( $[M+H]^+ = 347$ ), **17** ( $[M+H]^+ = 345$ ), **18** ( $[M+H]^+ = 387$ ), and **24** ( $[M+H]^+ = 389$ ). Structures are shown in Fig. S7.

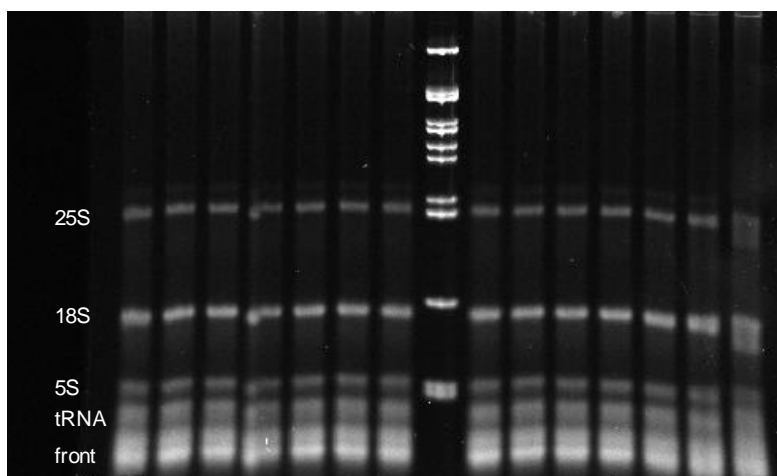

**Figure S22.** RNA-PAGE purification of total yeast RNA for isolation of tRNA.

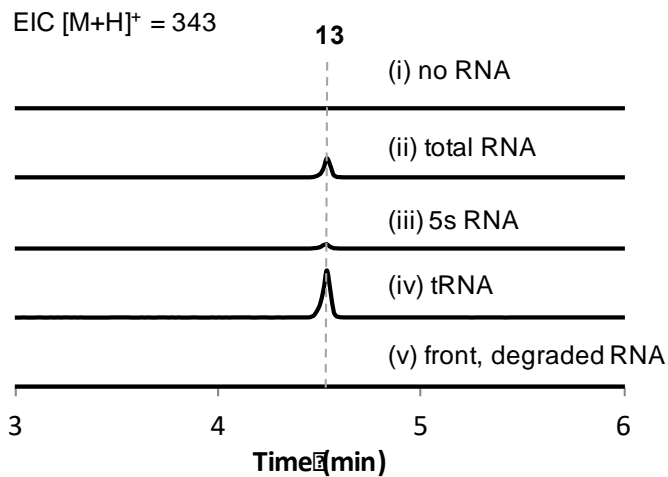

**Figure S23.** *In vitro* assays with purified AvaA, ArgRS, TrpRS, unlabeled substrates, and cofactors with various RNA fractions, including (i) no RNA, (ii) total yeast RNA, (iii) purified 5s RNA, (iv) purified tRNA, and (v) the degraded RNA front.

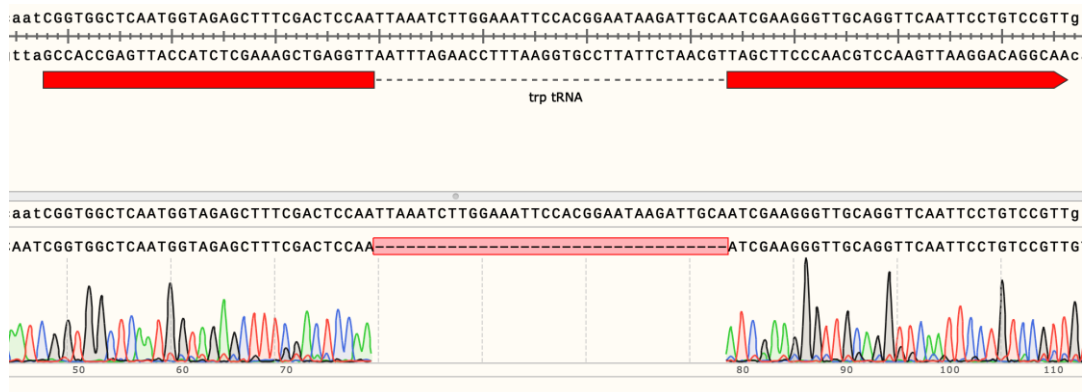

**Figure S24.** Sanger sequencing of RT-PCR product of tRNA<sup>Trp</sup> from the isolated tRNA band. The sequencing results showed the intron was removed, indicating the transcript was not amplified from genomic DNA contamination.

**Figure S25.**  $^1\text{H}$  NMR spectrum of compound **1** in  $\text{D}_2\text{O}$  0.5%  $\text{TFA-d}$  (500 MHz).

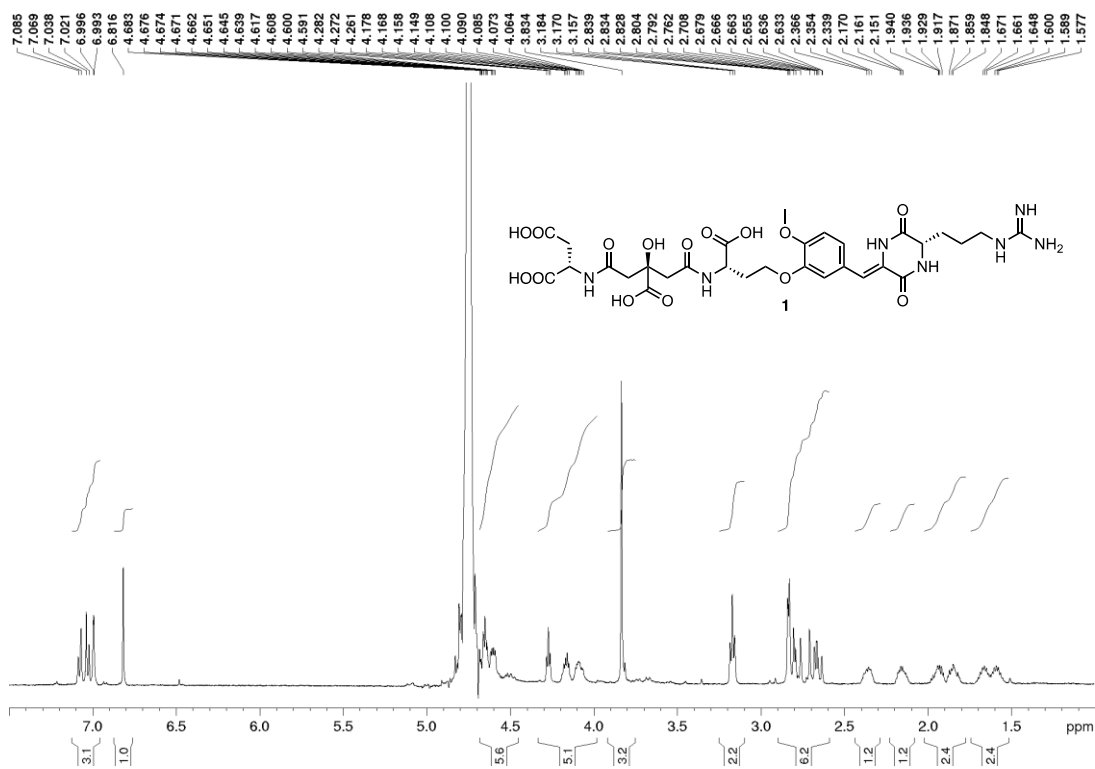

**Figure S26.**  $^{13}\text{C}$  NMR spectrum of compound **1** in  $\text{D}_2\text{O}$  0.5%  $\text{TFA-d}$  (125 MHz).

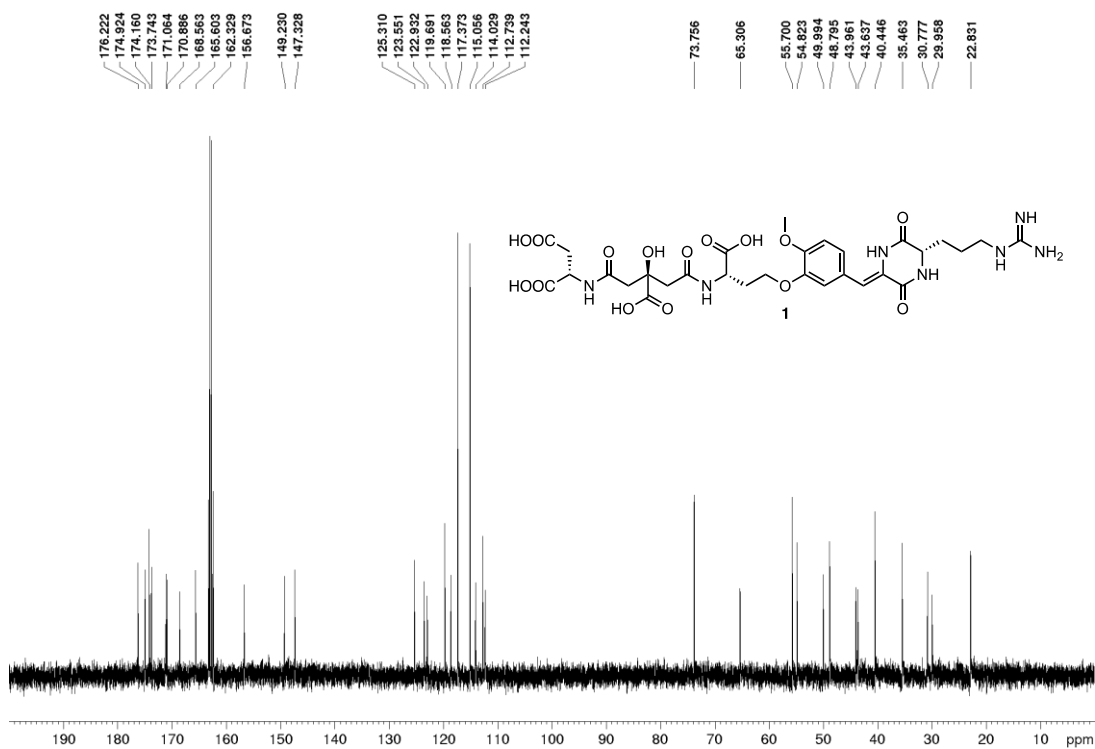



**Figure S27.**  $^1\text{H}$ - $^1\text{H}$  COSY spectrum of compound **1** in  $\text{D}_2\text{O}$  0.5% TFA-*d* (500 MHz).

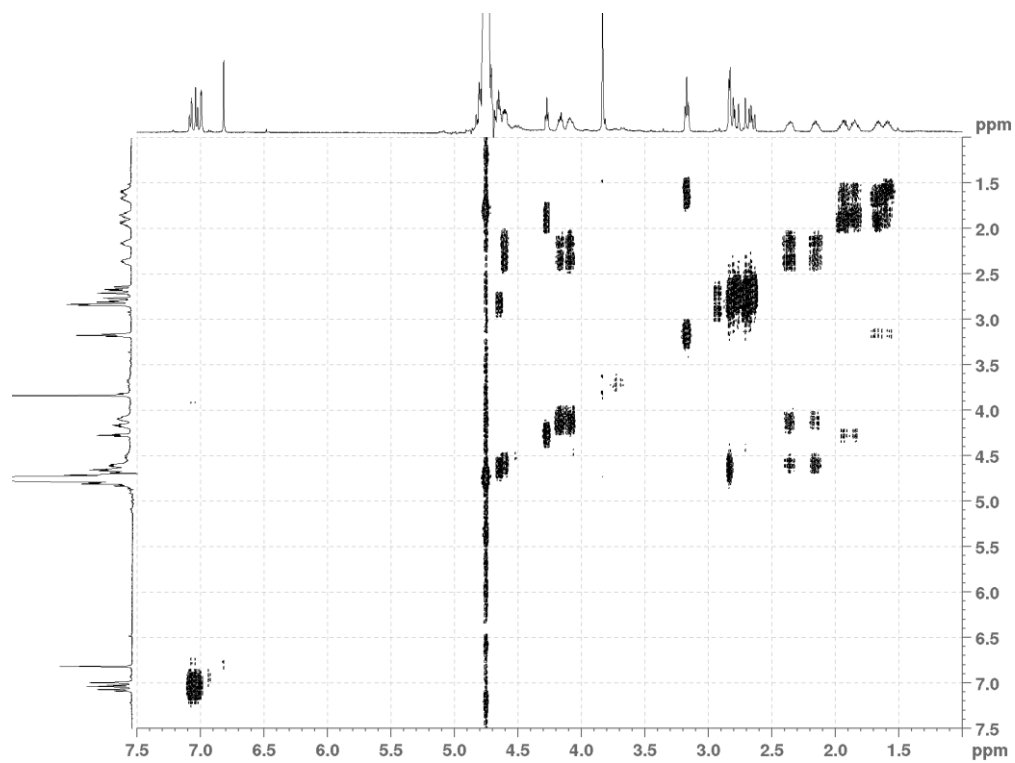

**Figure S28.** HSQC spectrum of compound **1** in  $\text{D}_2\text{O}$  0.5% TFA-*d* (500 MHz).

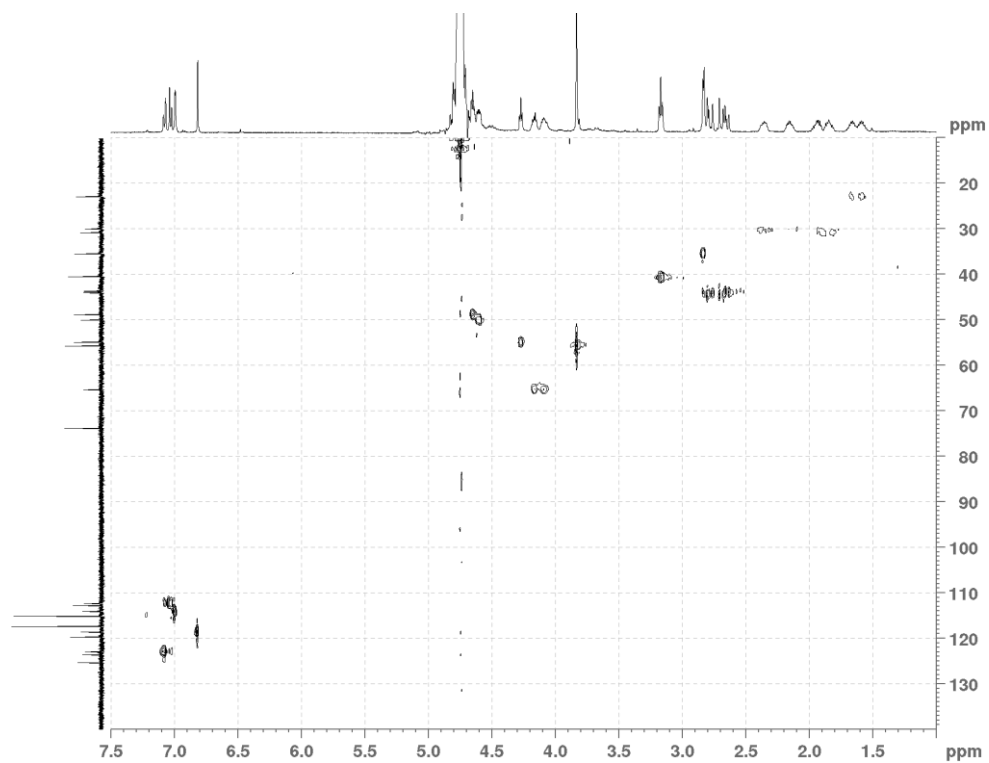

**Figure S29.** HMBC spectrum of compound **1** in D<sub>2</sub>O 0.5% TFA-*d* (500 MHz).

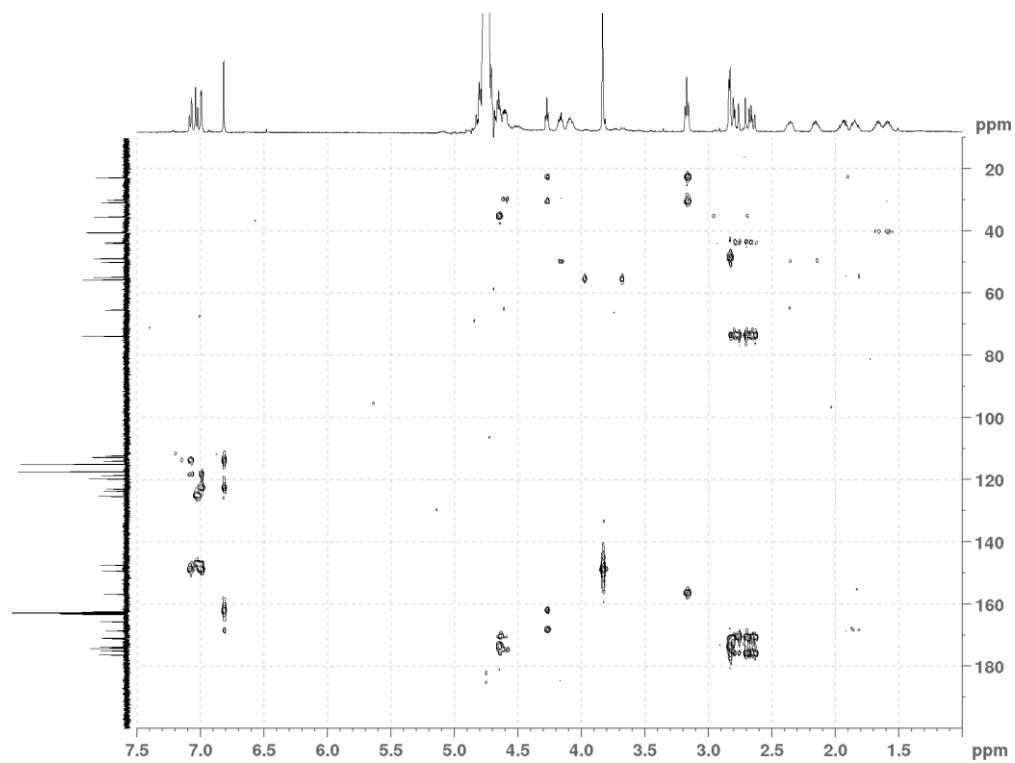

**Figure S30.**  $^1\text{H}$  NMR spectrum of compound **2** in  $\text{DMSO-}d_6$  0.5% TFA-*d* (500 MHz).

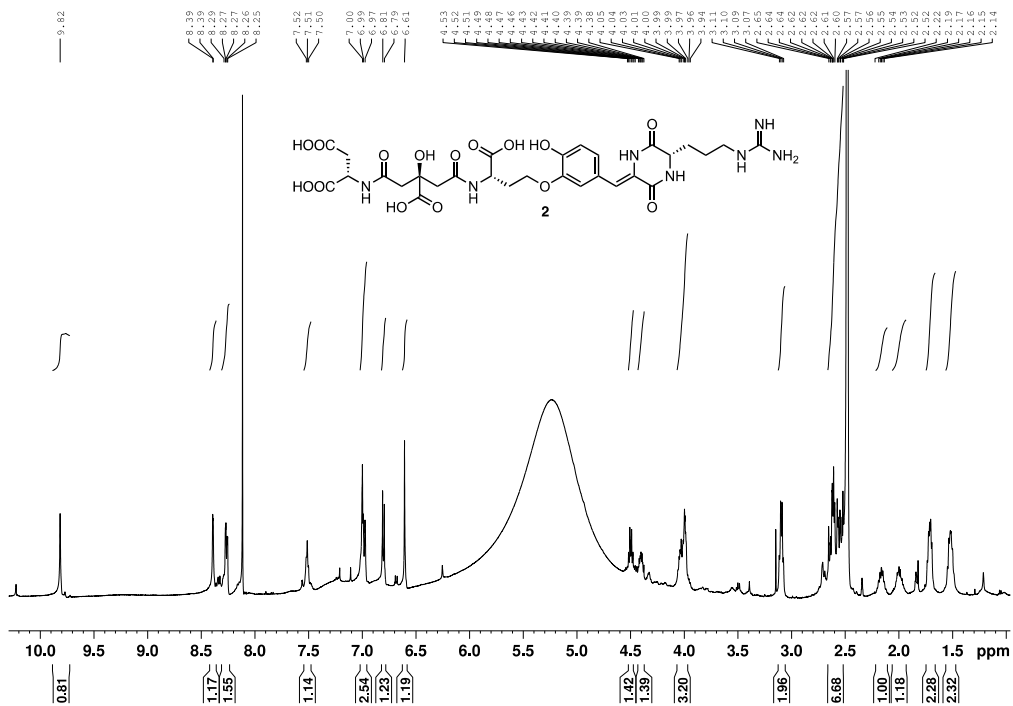

**Figure S31.**  $^{13}\text{C}$  NMR spectrum of compound **2** in  $\text{DMSO-}d_6$  0.5% TFA-*d* (125 MHz).

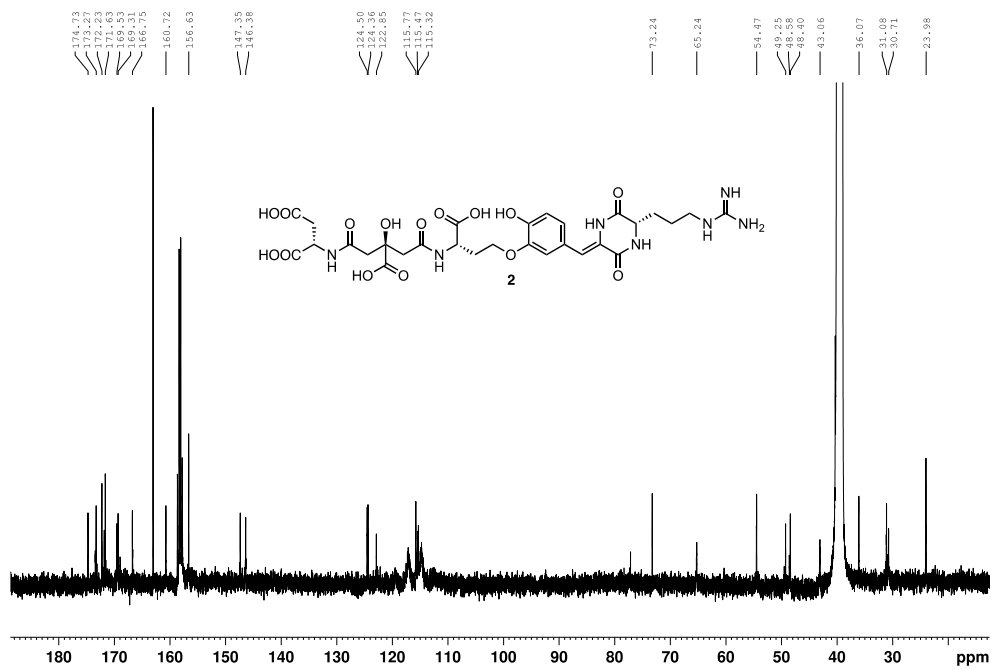

**Figure S32.** HSQC spectrum of compound **2** in DMSO-*d*<sub>6</sub> 0.5% TFA-*d* (500 MHz).

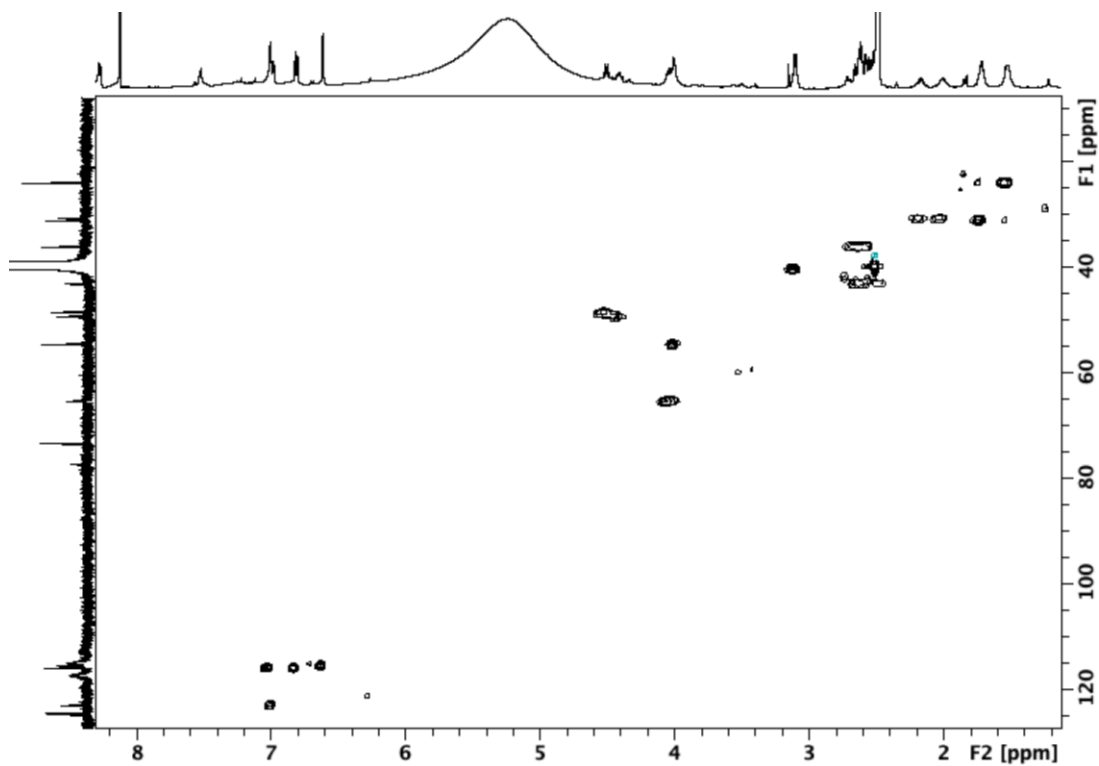

Figure S33.  $^1\text{H}$  NMR spectrum of compound **3** in  $\text{D}_2\text{O}$  0.5% TFA-*d* (500 MHz).

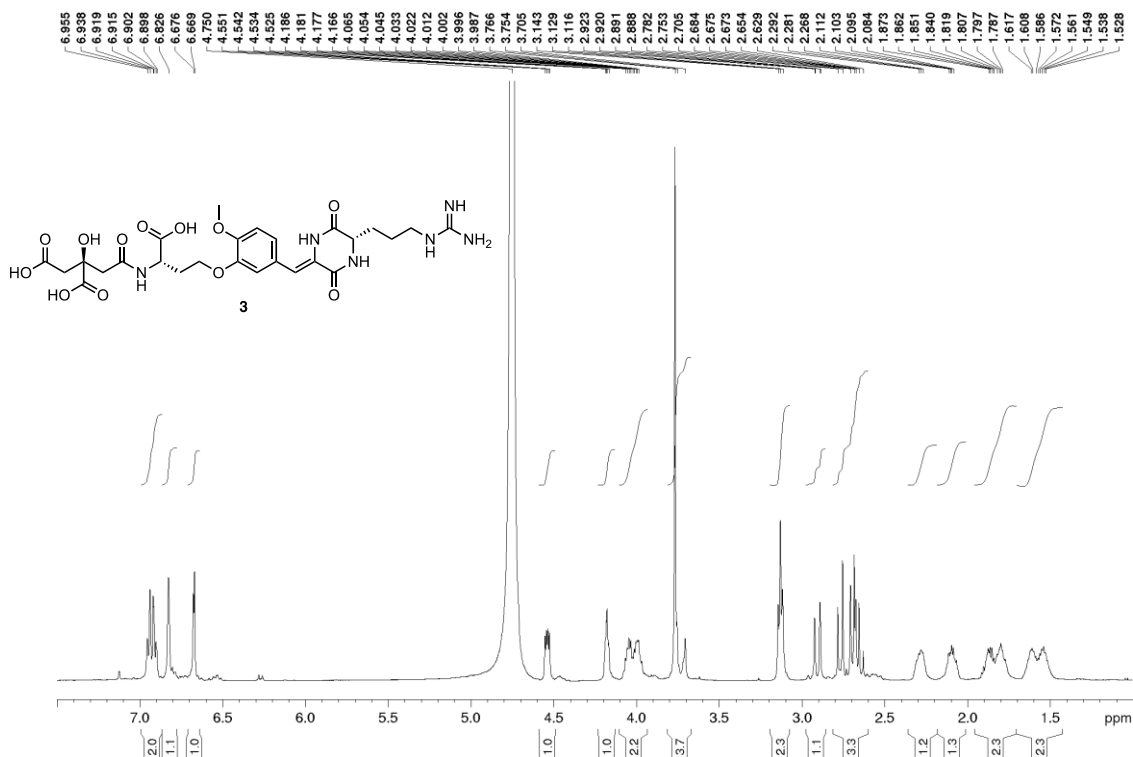

Figure S34.  $^{13}\text{C}$  NMR spectrum of compound **3** in  $\text{D}_2\text{O}$  0.5% TFA-*d* (125 MHz).

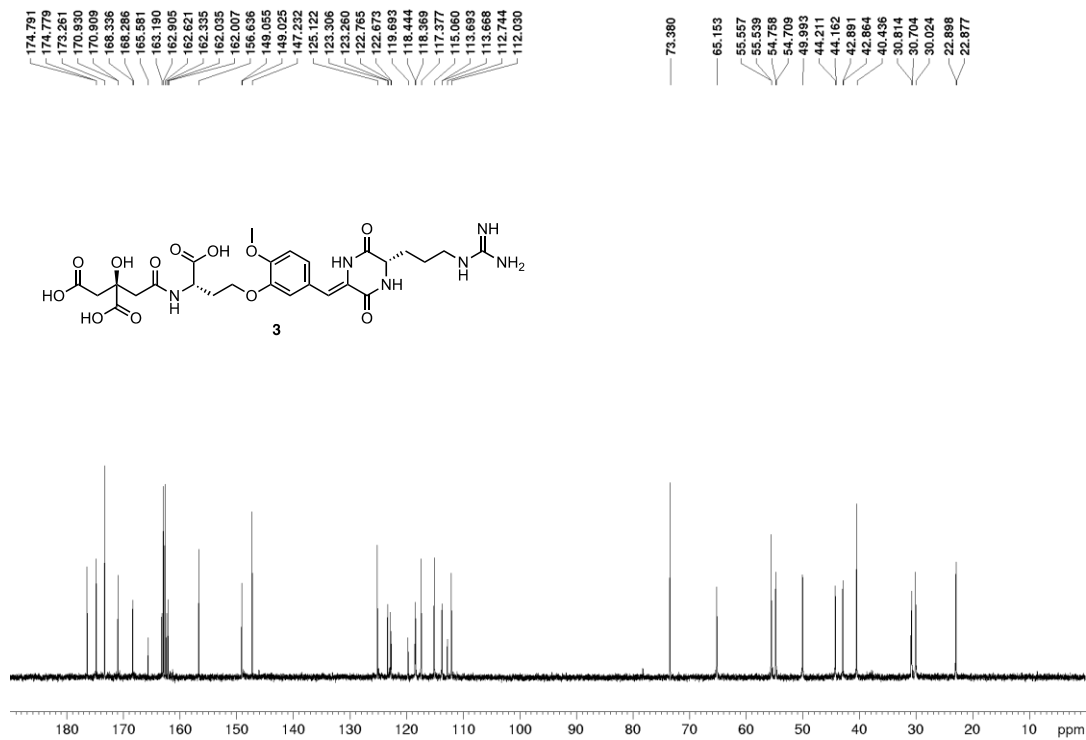

**Figure S35.**  $^1\text{H}$ - $^1\text{H}$  COSY spectrum of compound **3** in  $\text{D}_2\text{O}$  0.5% TFA-*d* (500 MHz).

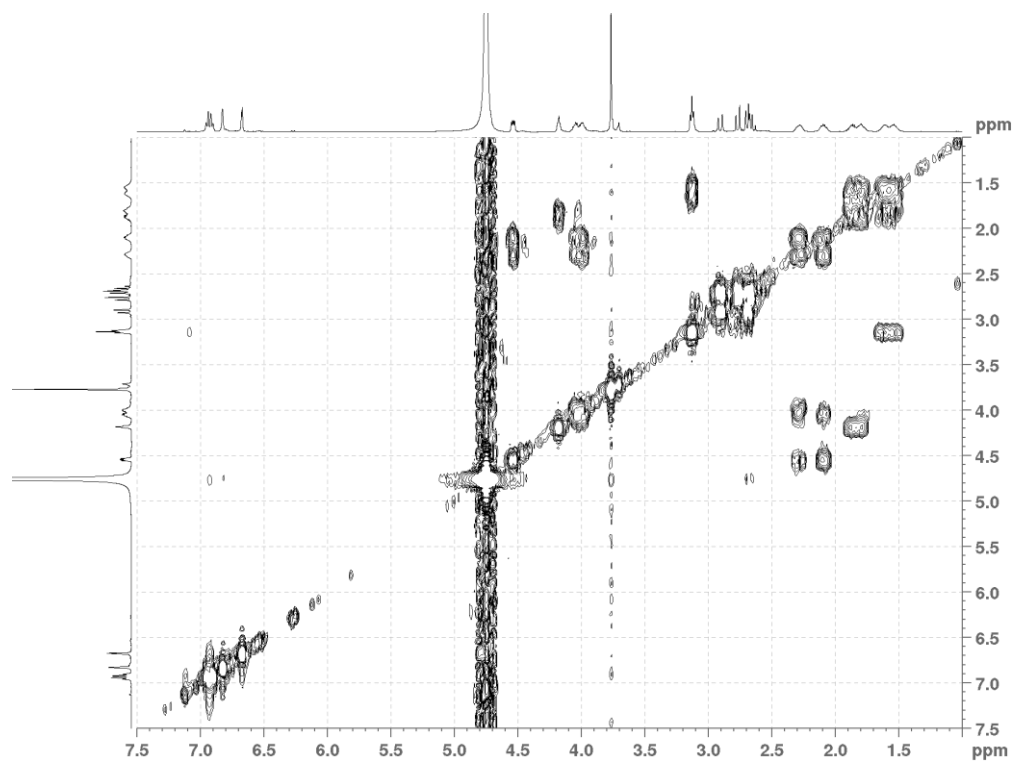

**Figure S36.** HSQC spectrum of compound **3** in  $\text{D}_2\text{O}$  0.5% TFA-*d* (500 MHz).

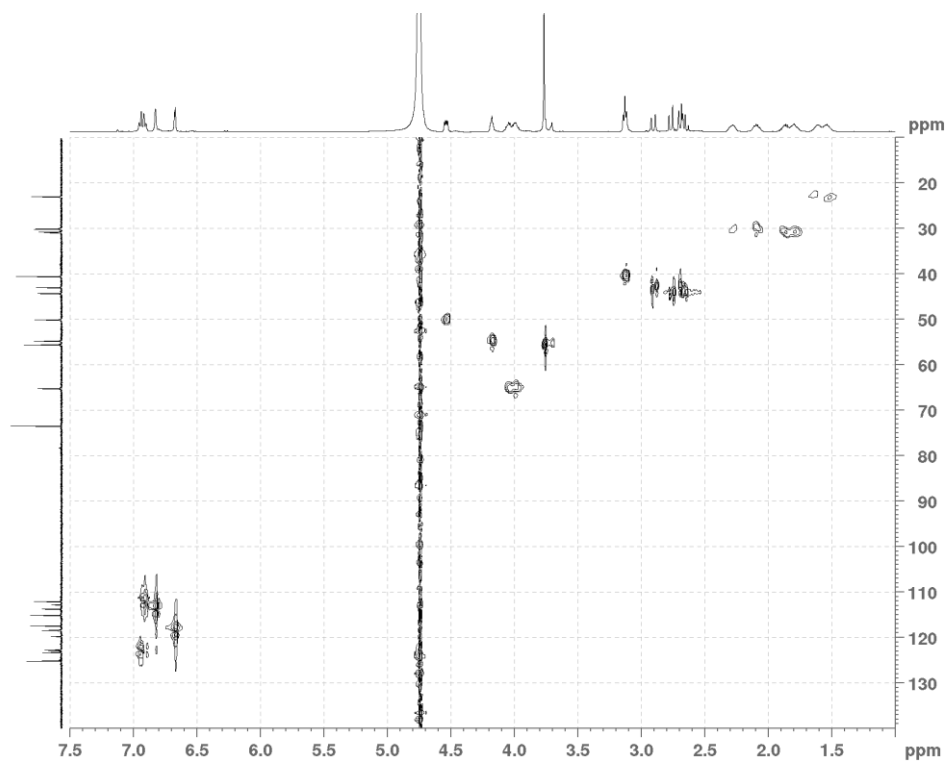

**Figure S37.** HMBC spectrum of compound **3** in D<sub>2</sub>O/0.5% TFA-*d* (500 MHz).

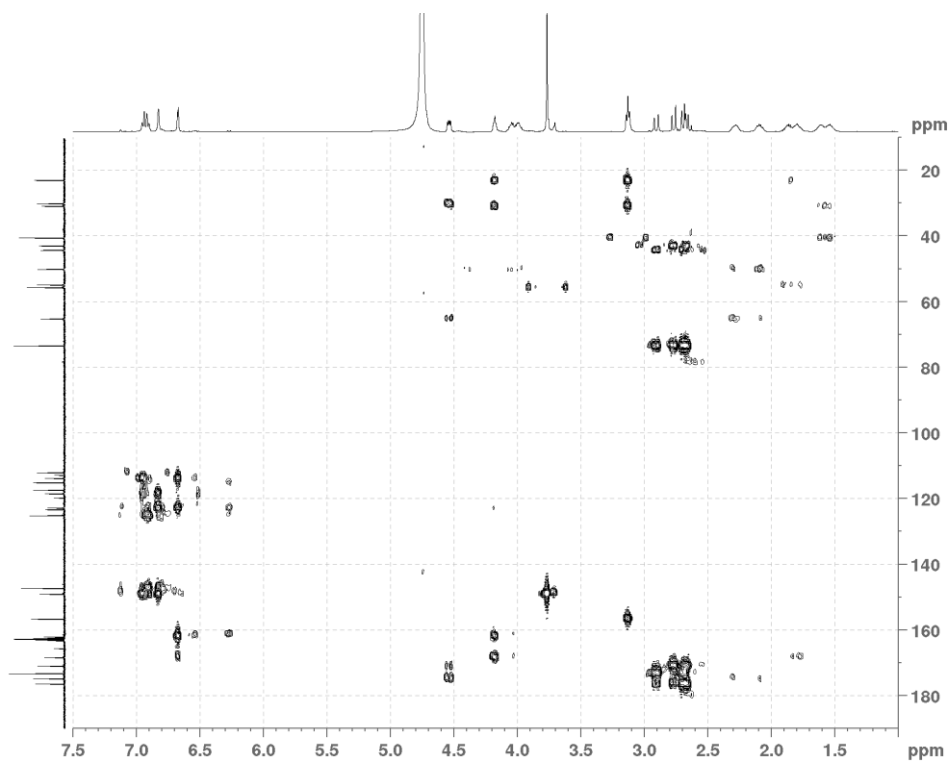

**Figure S38.**  $^1\text{H}$  NMR spectrum of compound **3b** in  $\text{D}_2\text{O}$  0.5% TFA-*d* (500 MHz).

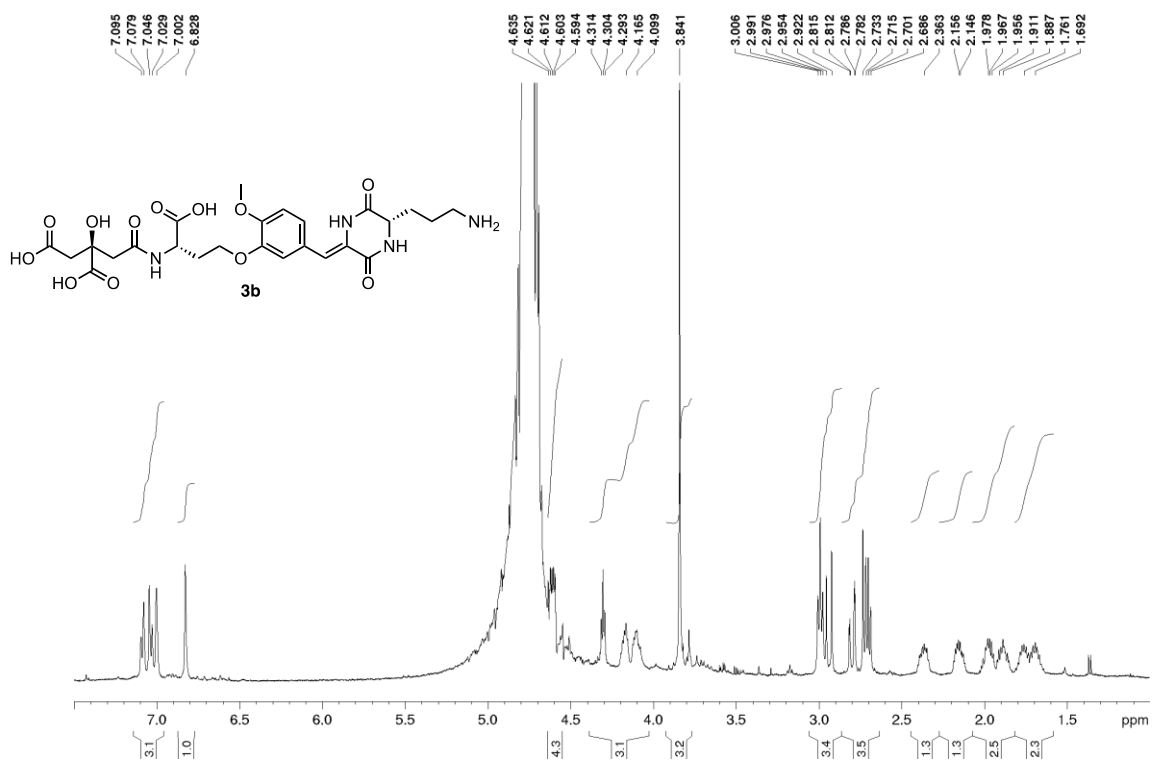

**Figure S39.**  $^{13}\text{C}$  NMR spectrum of compound **3b** in  $\text{D}_2\text{O}$  0.5% TFA-*d* (125 MHz).

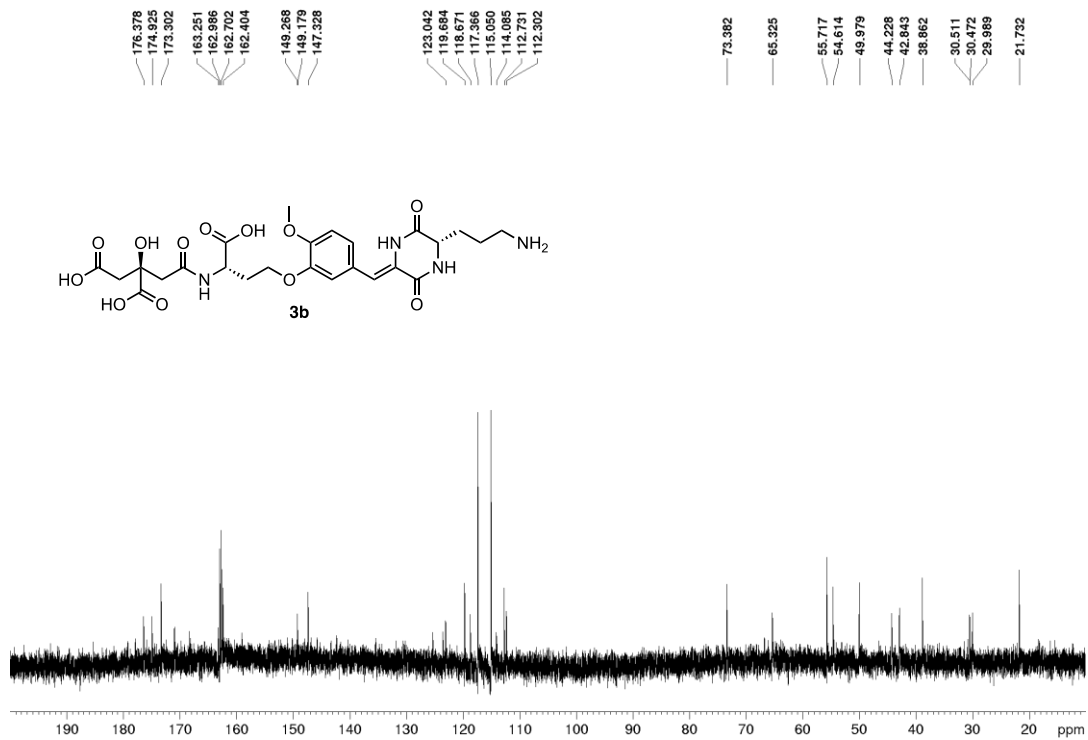



**Figure S40.**  $^1\text{H}$ - $^1\text{H}$  COSY spectrum of compound **3b** in  $\text{D}_2\text{O}$  0.5% TFA-*d* (500 MHz).

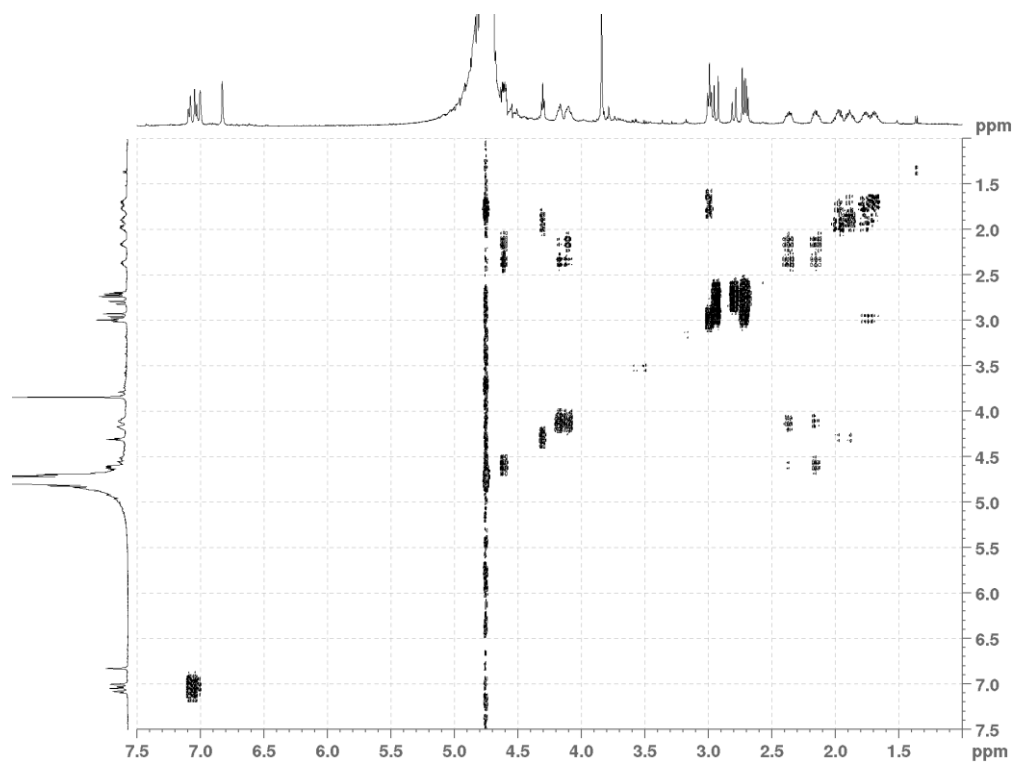

**Figure S41.** HSQC spectrum of compound **3b** in  $\text{D}_2\text{O}$  0.5% TFA-*d* (500 MHz).

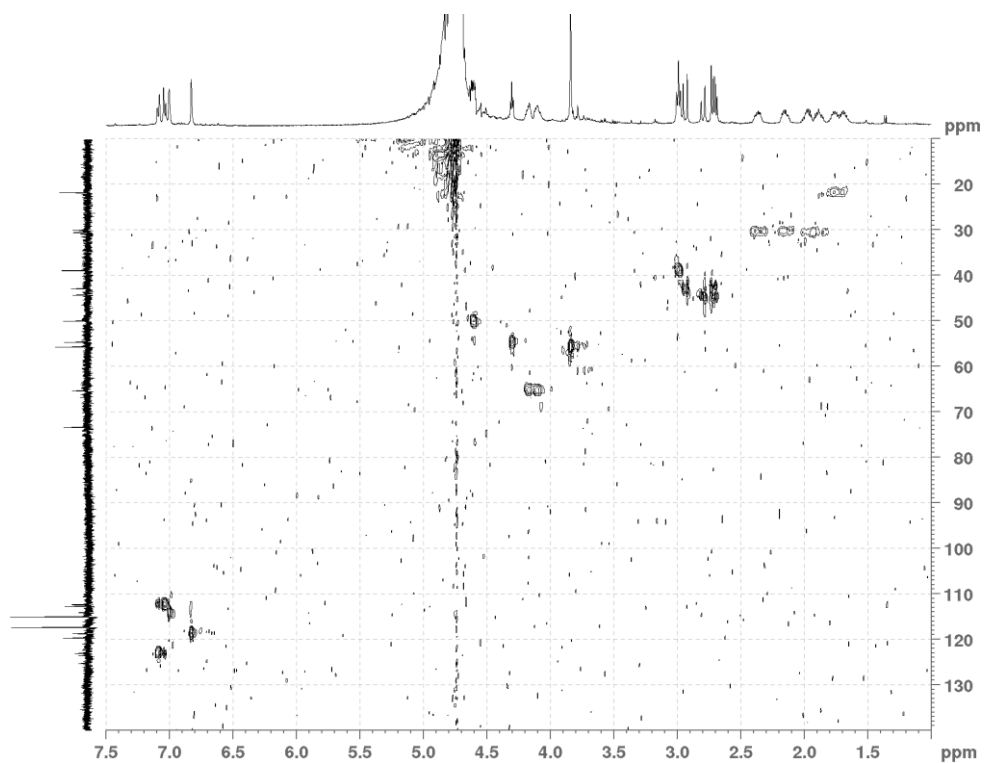

**Figure S42.** HMBC spectrum of compound **3b** in D<sub>2</sub>O 0.5% TFA-*d* (500 MHz).

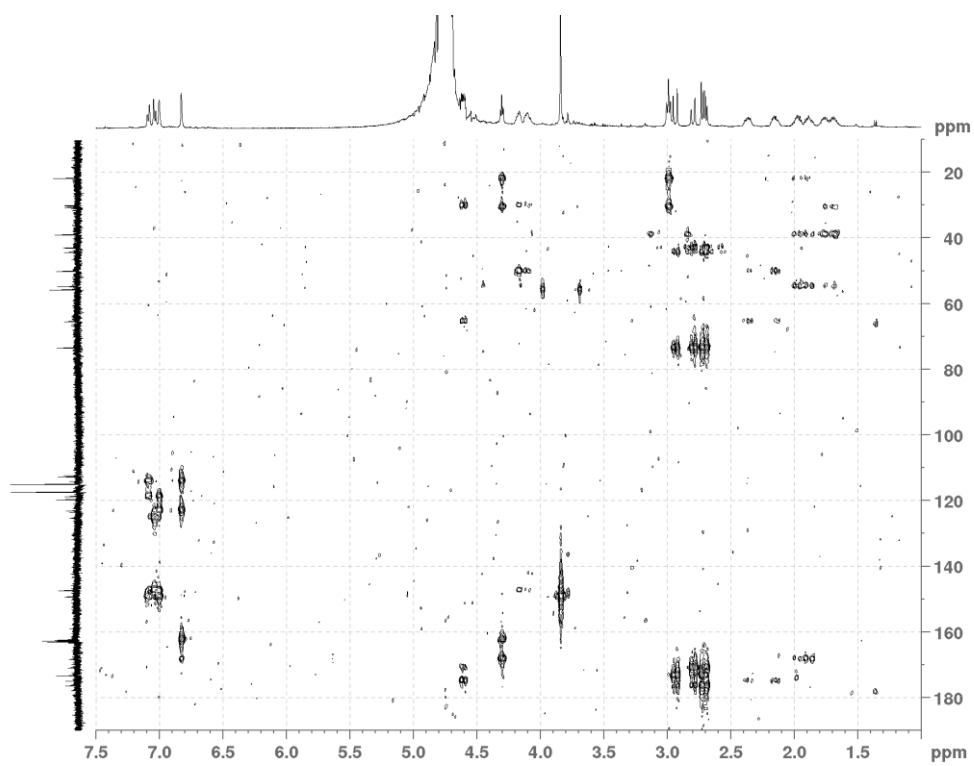

**Figure S43.**  $^1\text{H}$  NMR spectrum of compound **4** in  $\text{DMSO-}d_6$  0.5% TFA- $d$  (500 MHz).

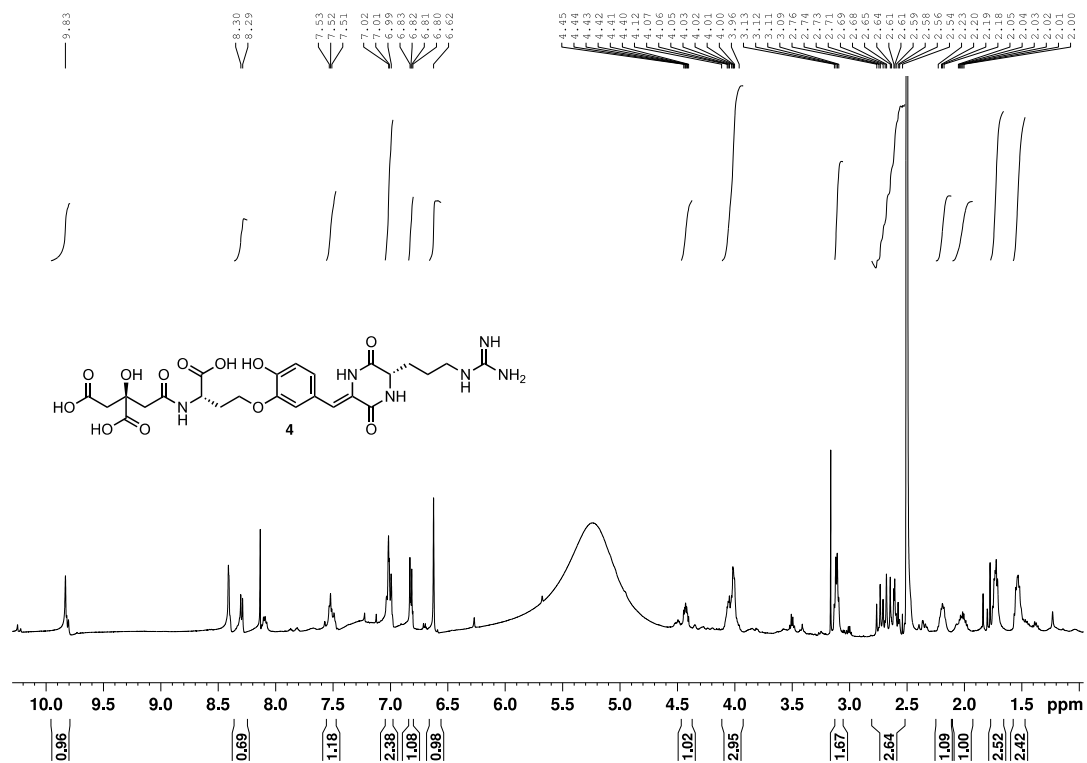

**Figure S44.**  $^{13}\text{C}$  NMR spectrum of compound **4** in  $\text{DMSO-}d_6$  0.5% TFA- $d$  (125 MHz).

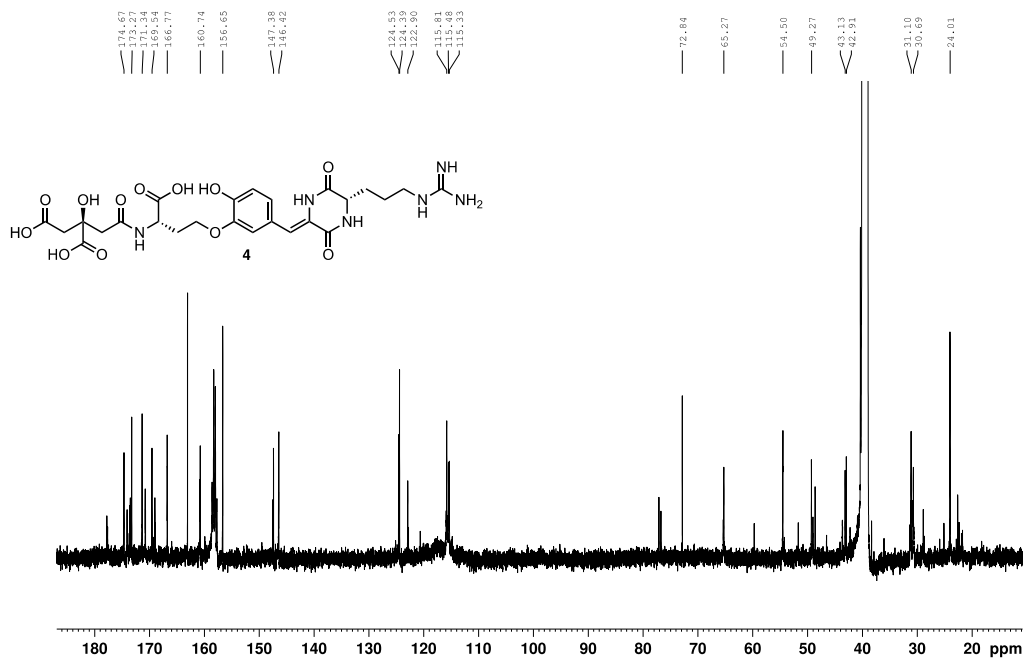

**Figure S45.** HSQC spectrum of compound **4** in DMSO-*d*<sub>6</sub> 0.5% TFA-*d* (500 MHz).

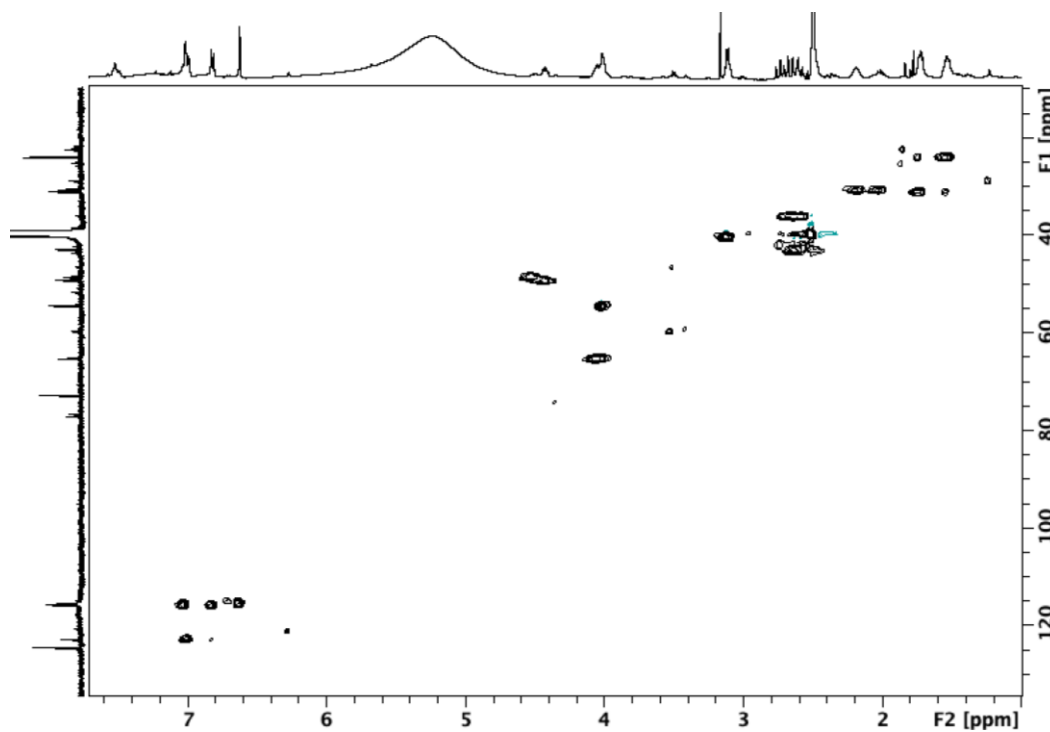

**Figure S46.**  $^1\text{H}$  NMR spectrum of compound **5** in  $\text{D}_2\text{O}$  0.5%  $\text{TFA-d}$  (500 MHz).

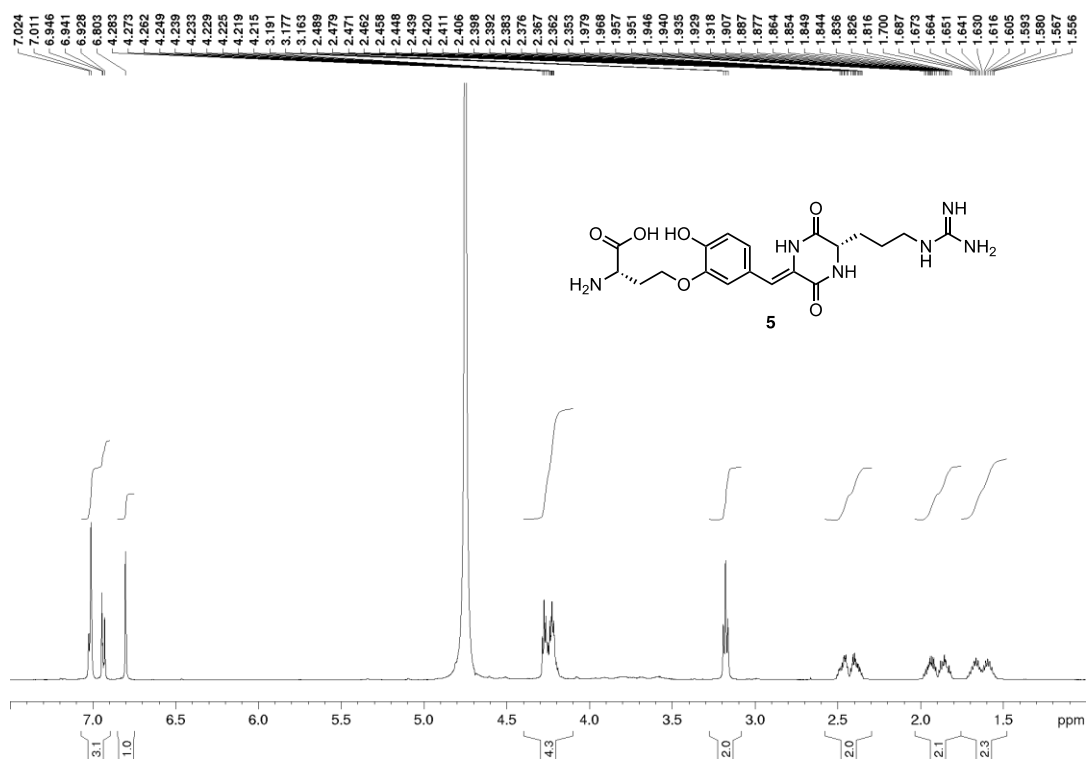

**Figure S47.**  $^1\text{H}$  NMR spectrum of compound **5** in  $\text{D}_2\text{O}$  0.5%  $\text{TFA-d}$  (125 MHz).

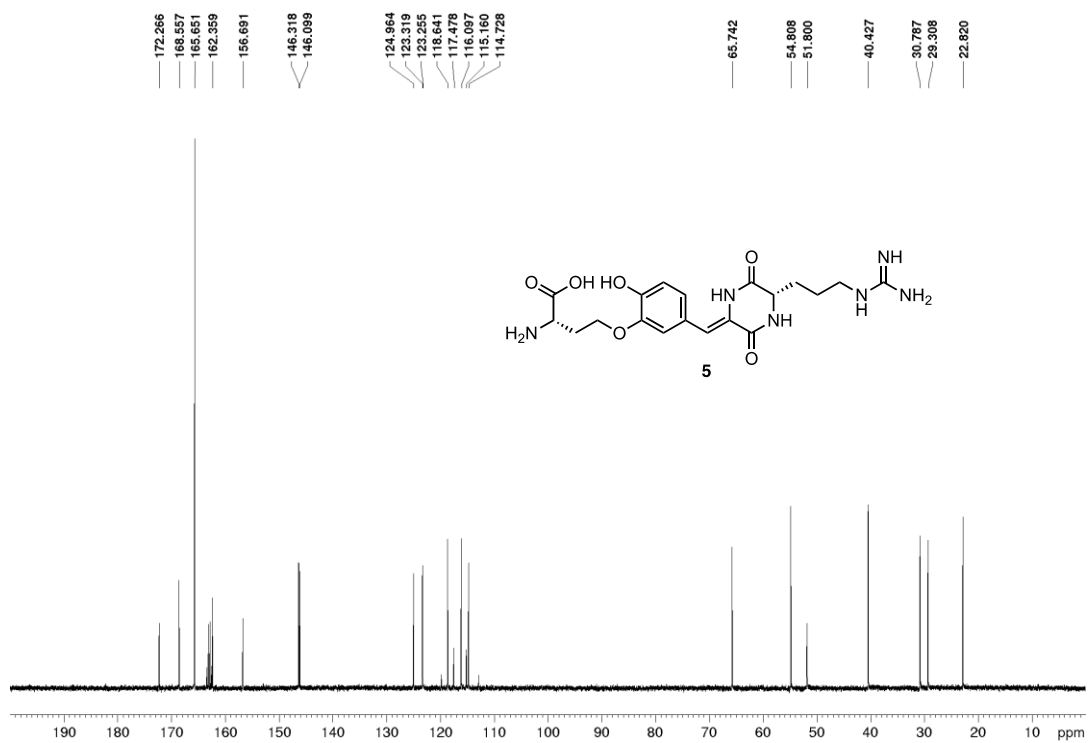

**Figure S48.**  $^1\text{H}$ - $^1\text{H}$  COSY spectrum of compound **5** in  $\text{D}_2\text{O}$  0.5% TFA-*d* (500 MHz).

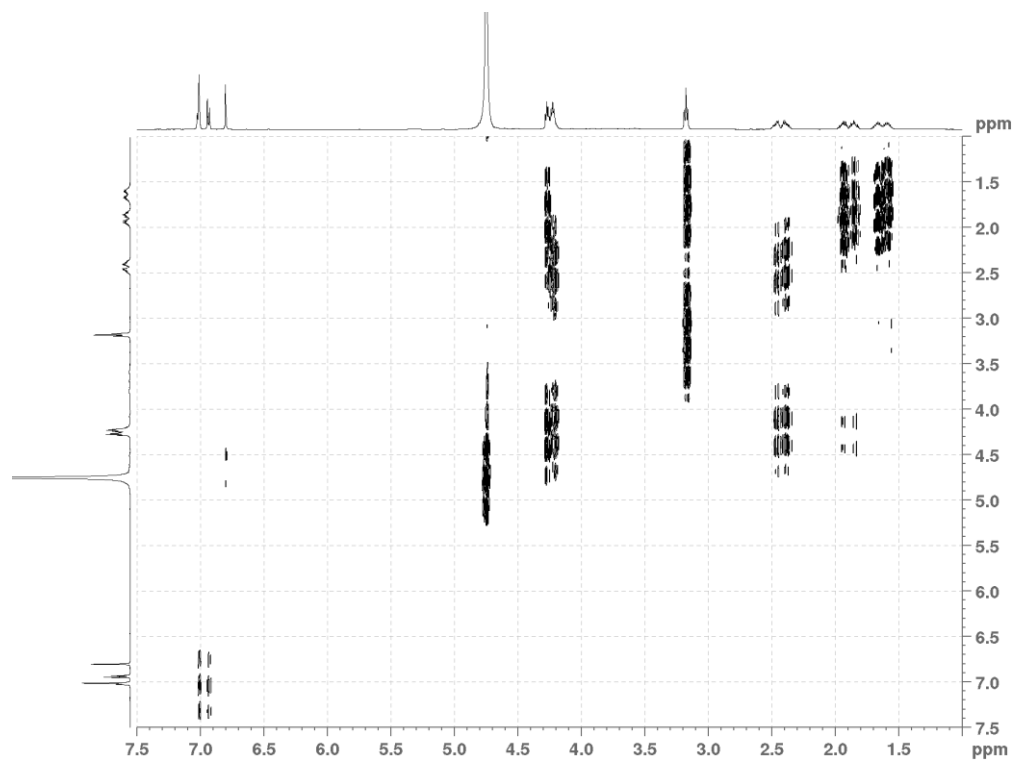

**Figure S49.** HSQC spectrum of compound **5** in  $\text{D}_2\text{O}$  0.5% TFA-*d* (500 MHz).

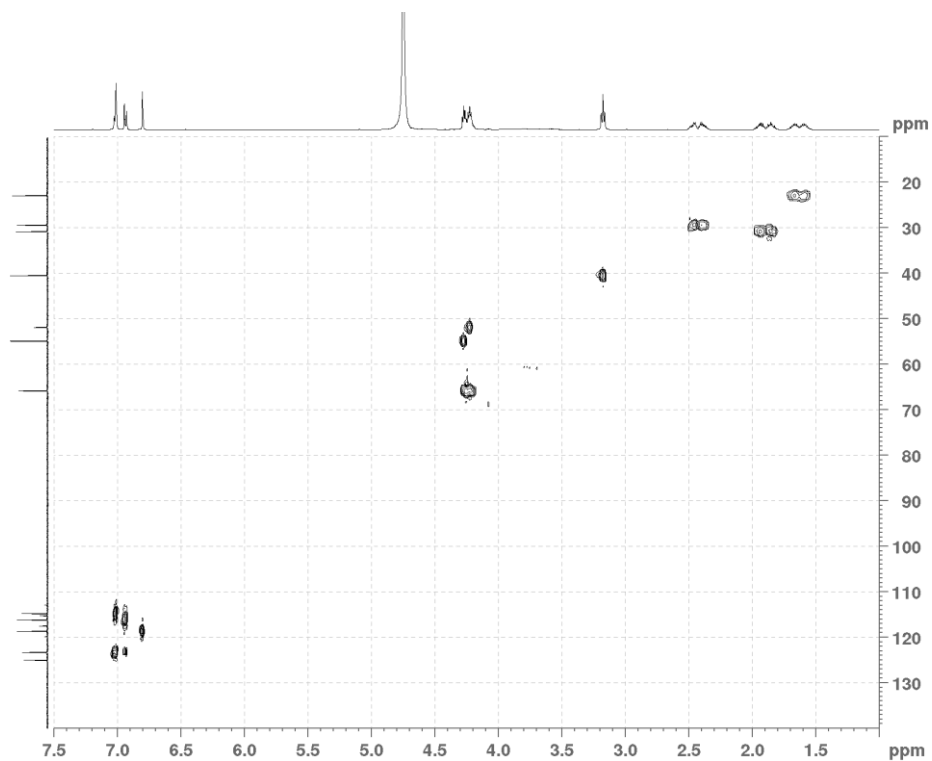

**Figure S50.** HMBC spectrum of compound **5** in D<sub>2</sub>O 0.5% TFA-*d* (500 MHz).

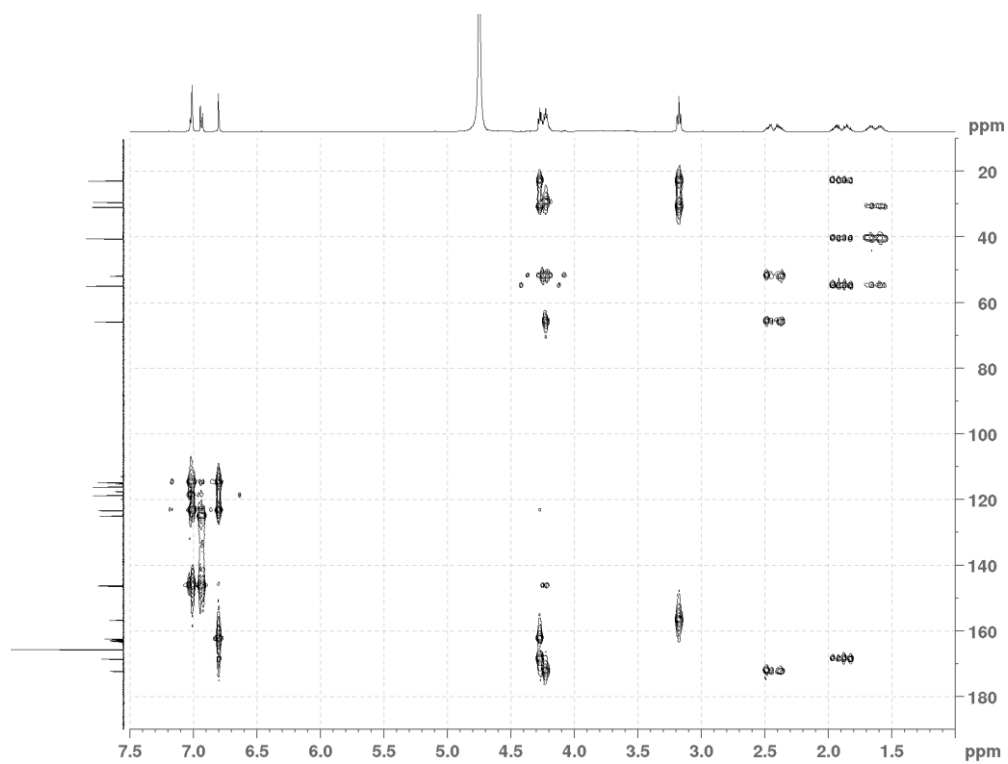

**Figure S51.**  $^1\text{H}$  NMR spectrum of compound **6** in  $\text{D}_2\text{O}$  0.5% TFA-*d* (500 MHz).

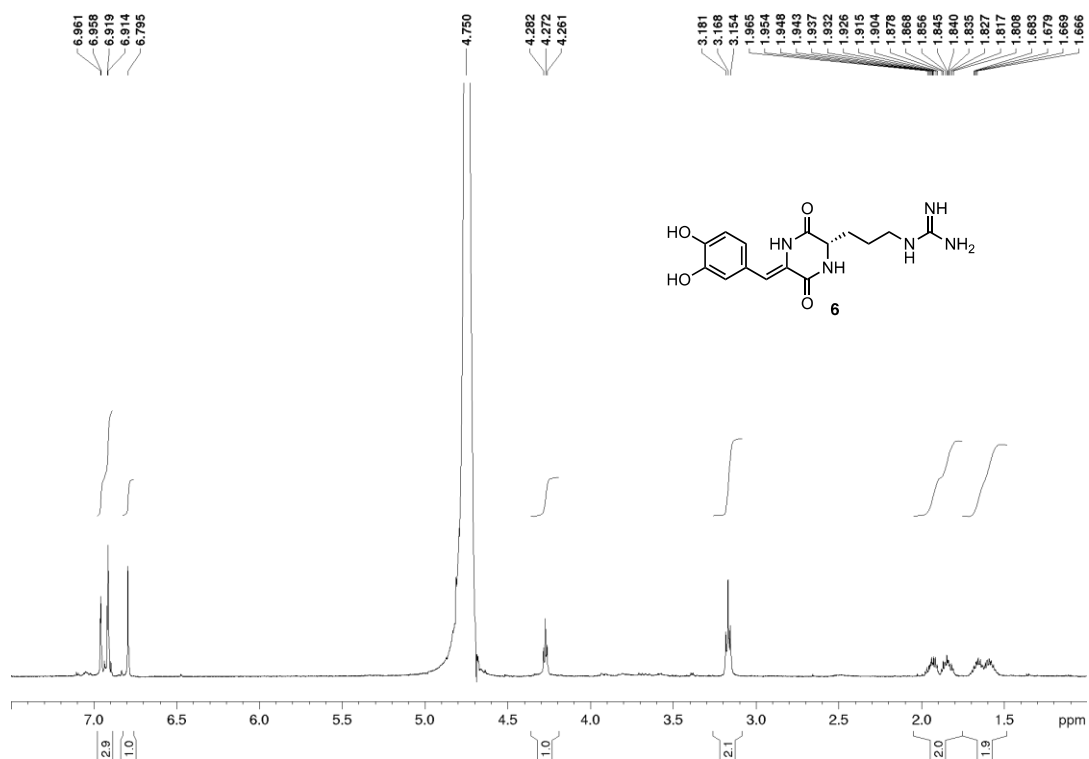

**Figure S52.**  $^{13}\text{C}$  NMR spectrum of compound **6** in  $\text{D}_2\text{O}$  0.5% TFA-*d* (125 MHz).

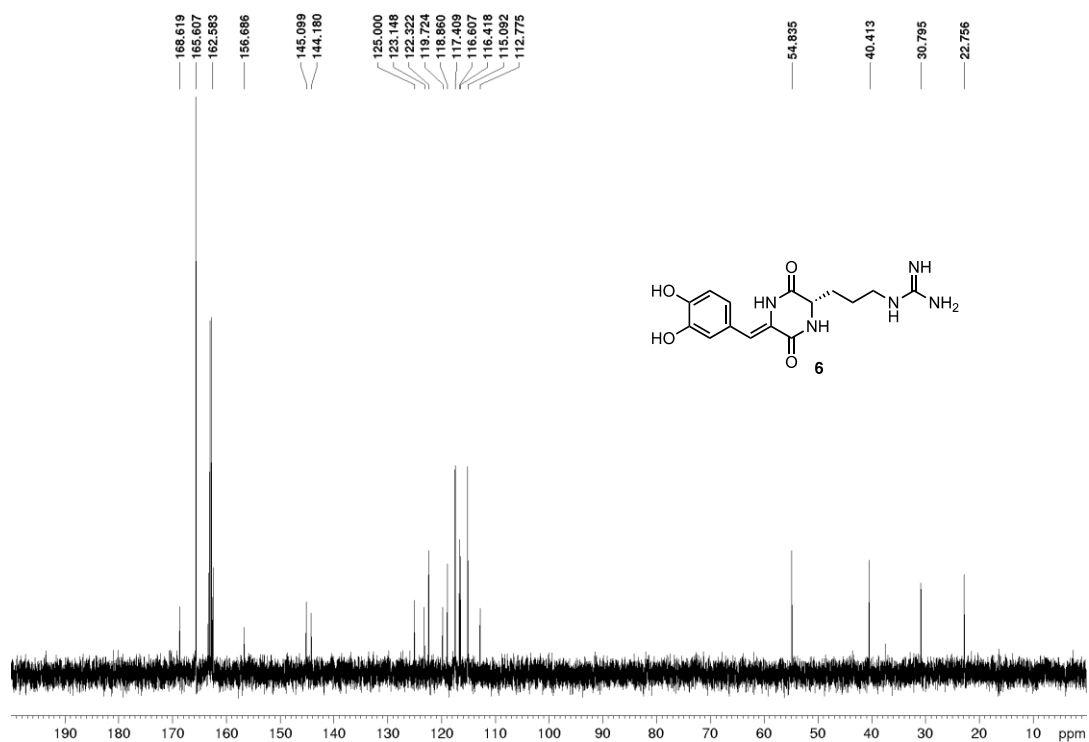



**Figure S53.**  $^1\text{H}$ - $^1\text{H}$  COSY spectrum of compound **6** in  $\text{D}_2\text{O}$  0.5% TFA-*d* (500 MHz).

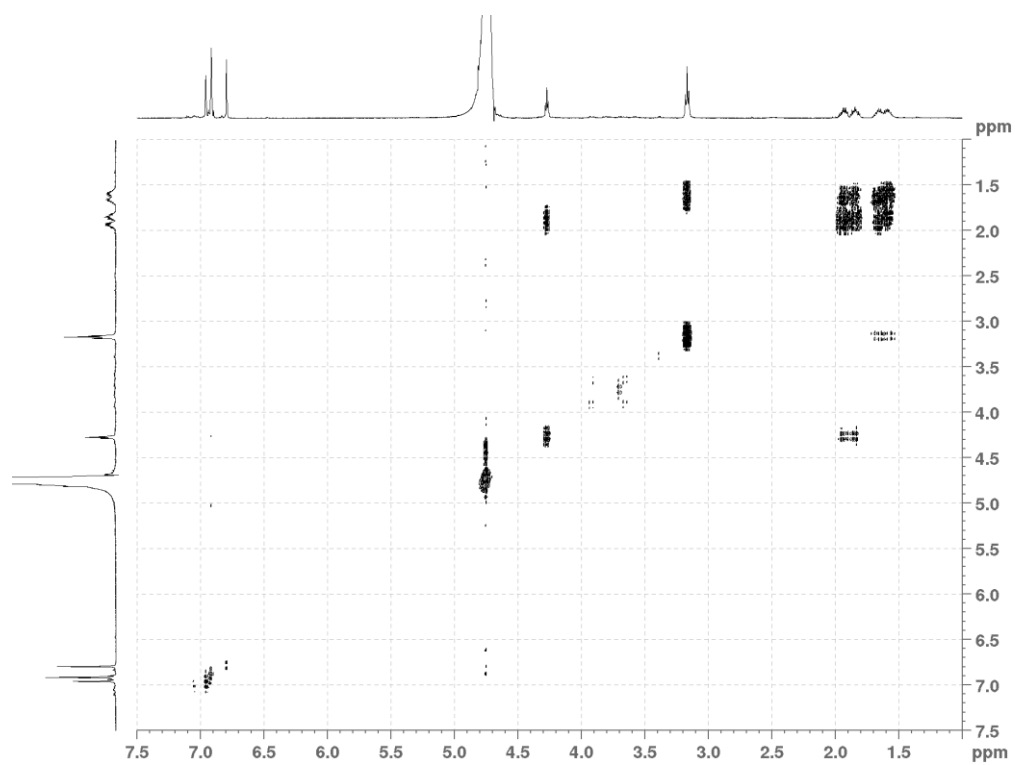

**Figure S54.** HSQC spectrum of compound **6** in  $\text{D}_2\text{O}$  0.5% TFA-*d* (500 MHz).

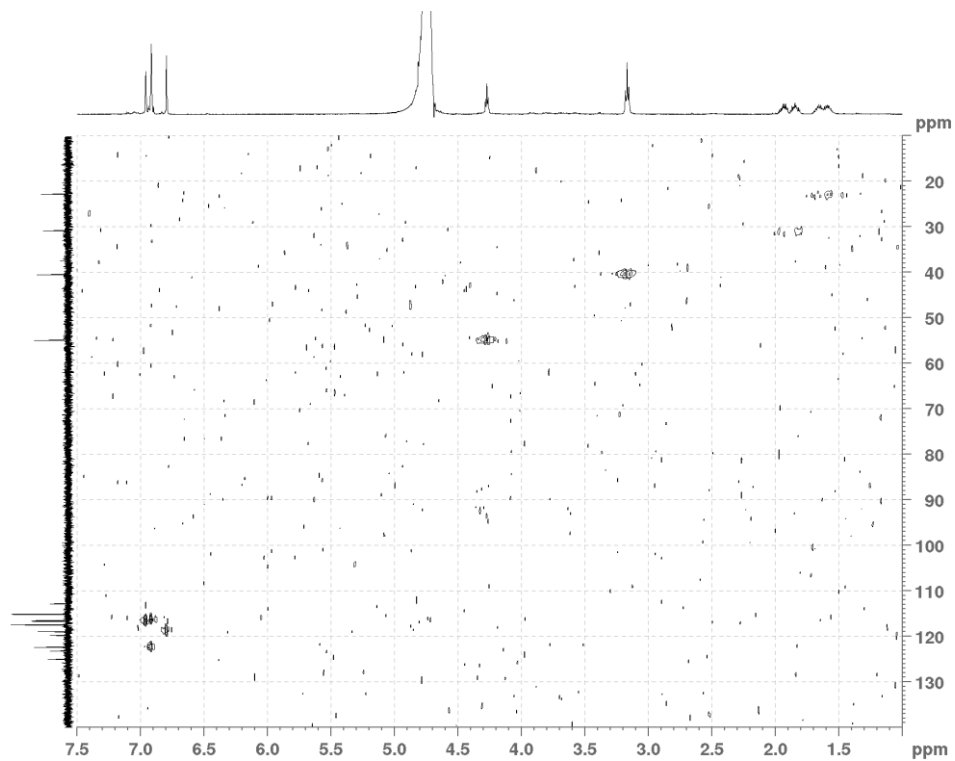

**Figure S55.** HMBC spectrum of compound **6** in D<sub>2</sub>O 0.5% TFA-*d* (500 MHz).

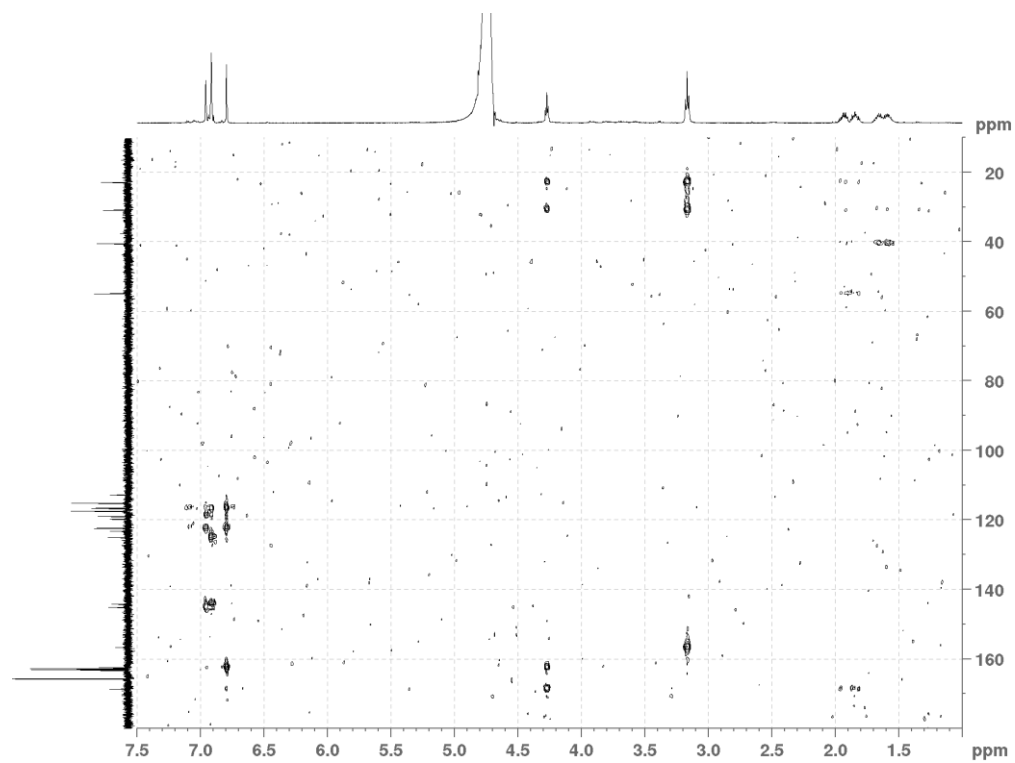

**Figure S56.**  $^1\text{H}$  NMR spectrum of compound **9** in  $\text{D}_2\text{O}$  (500 MHz).

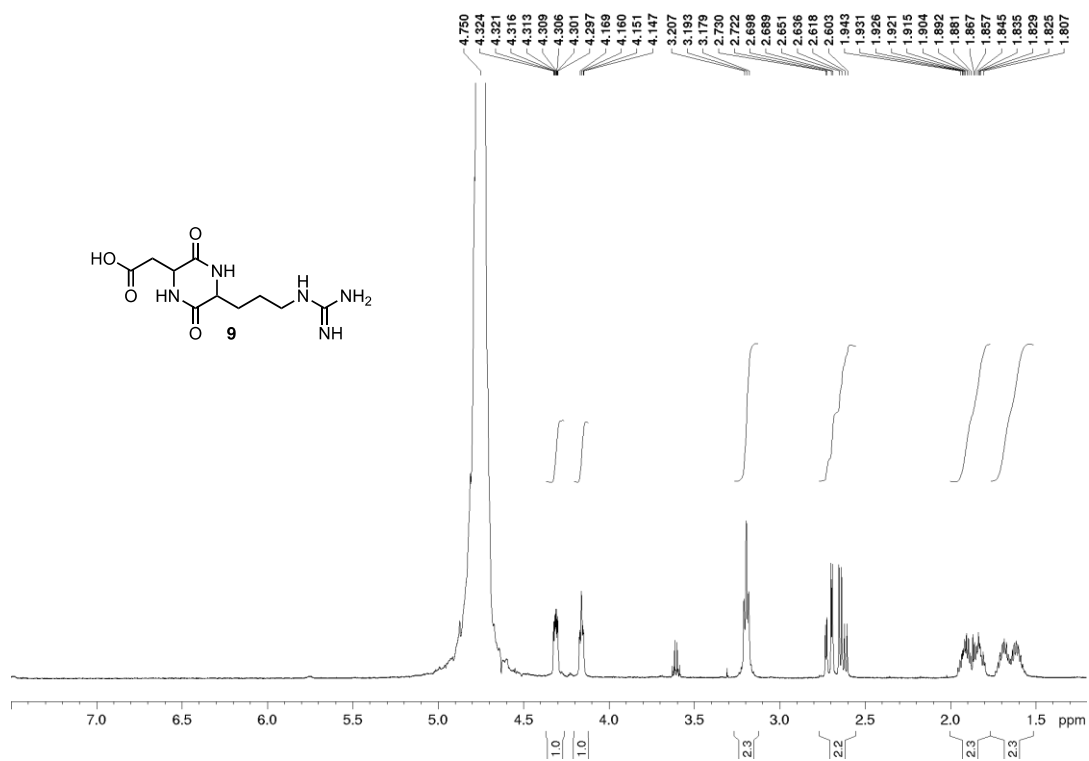

**Figure S57.**  $^{13}\text{C}$  NMR spectrum of compound **9** in  $\text{D}_2\text{O}$  (125 MHz).

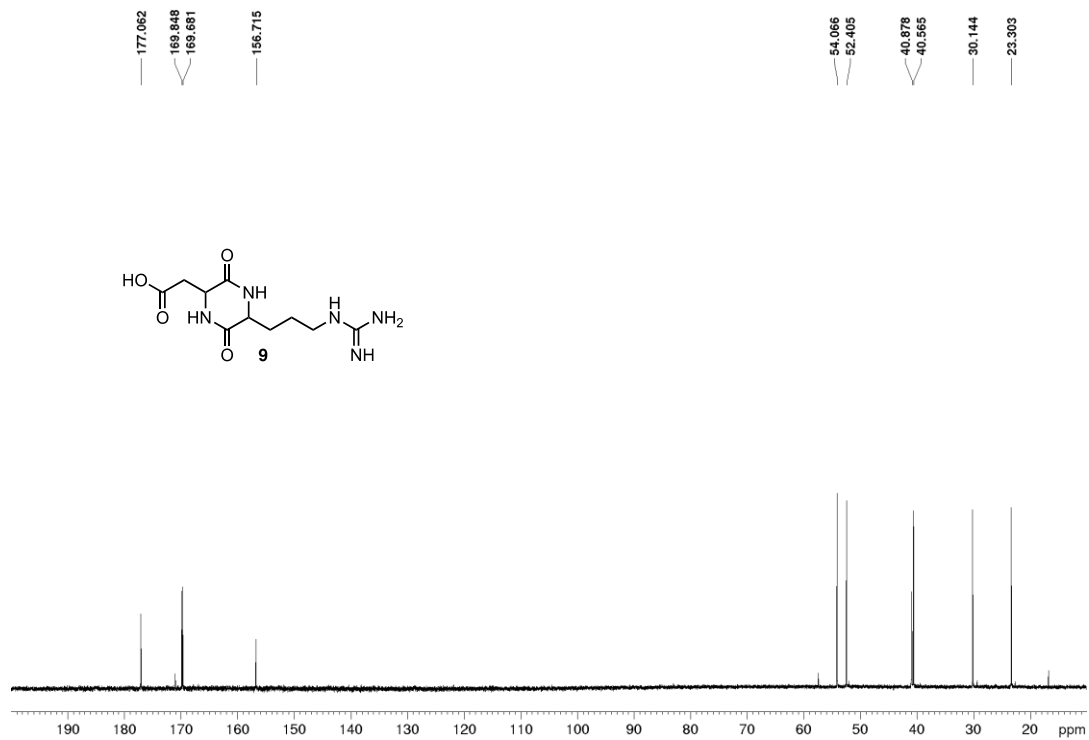

**Figure S58.**  $^1\text{H}$ - $^1\text{H}$  COSY spectrum of compound **9** in  $\text{D}_2\text{O}$  (500 MHz).

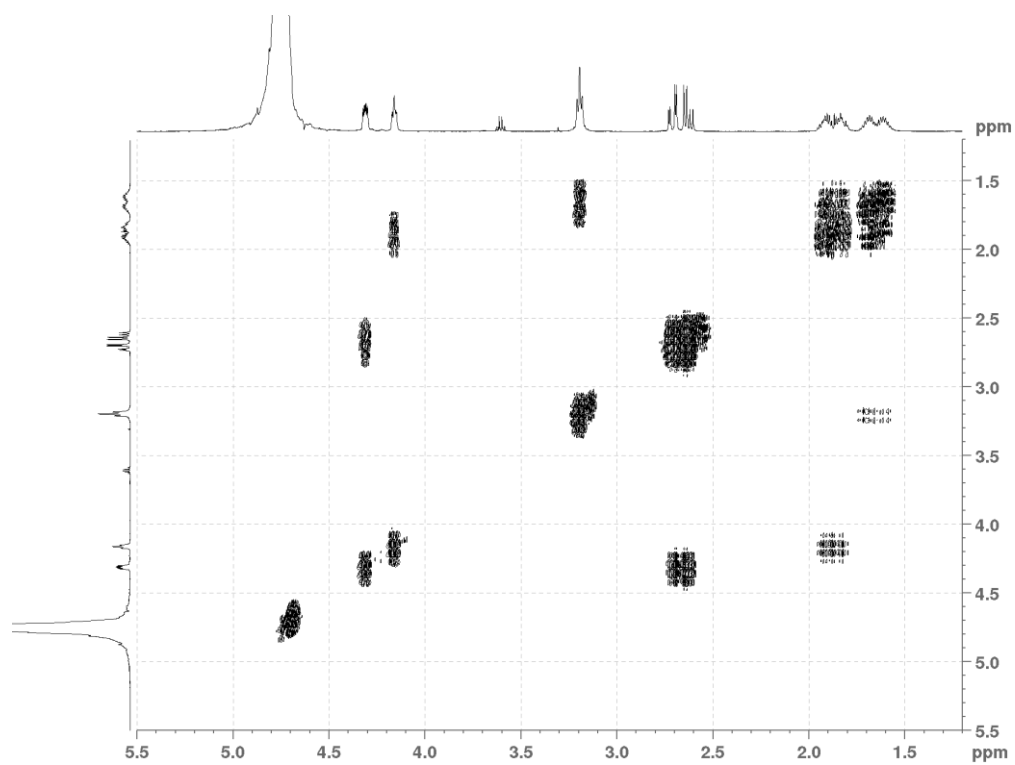

**Figure S59.** HSQC spectrum of compound **9** in  $\text{D}_2\text{O}$  (500 MHz).

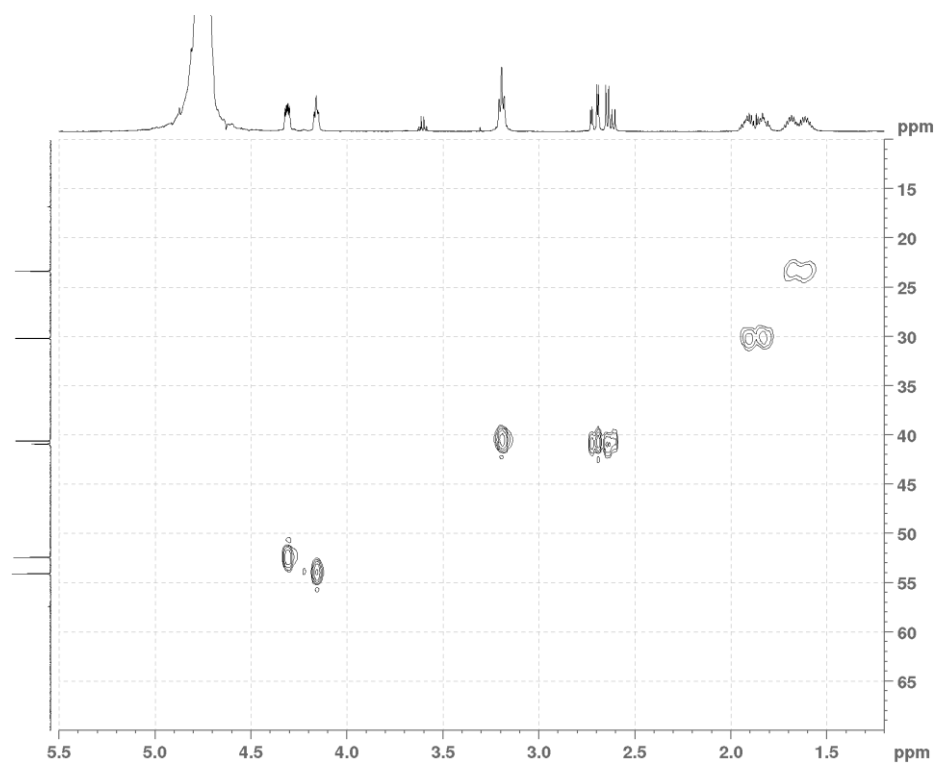

**Figure S60.** HMBC spectrum of compound **9** in D<sub>2</sub>O (500 MHz).

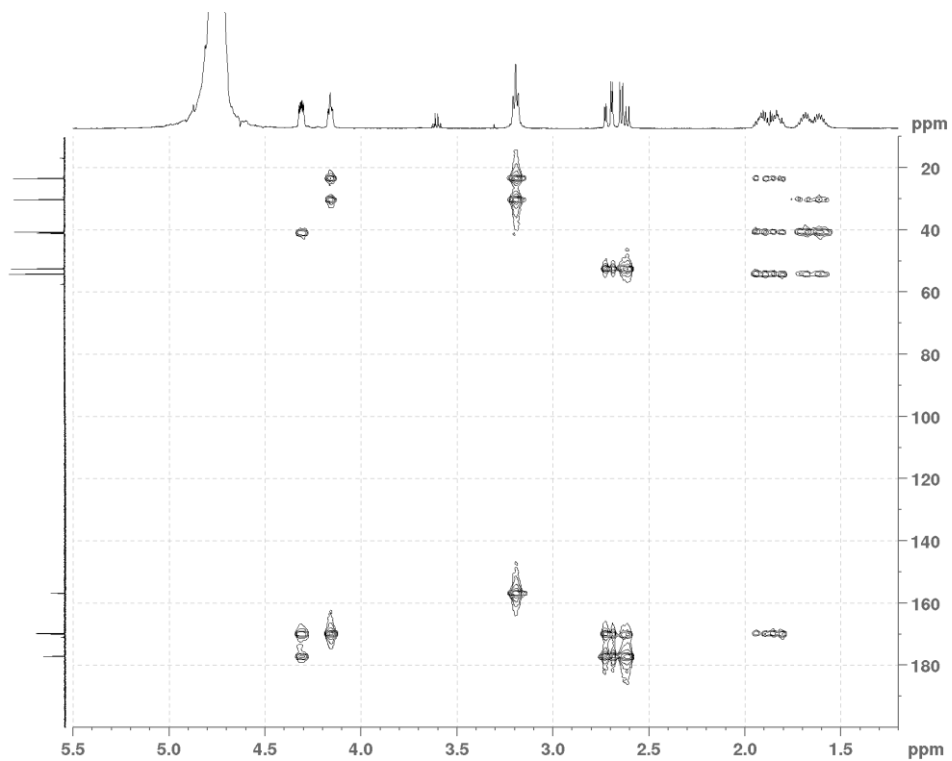

**Figure S61.**  $^1\text{H}$  NMR spectrum of compound **10** in  $\text{D}_2\text{O}$  (500 MHz).

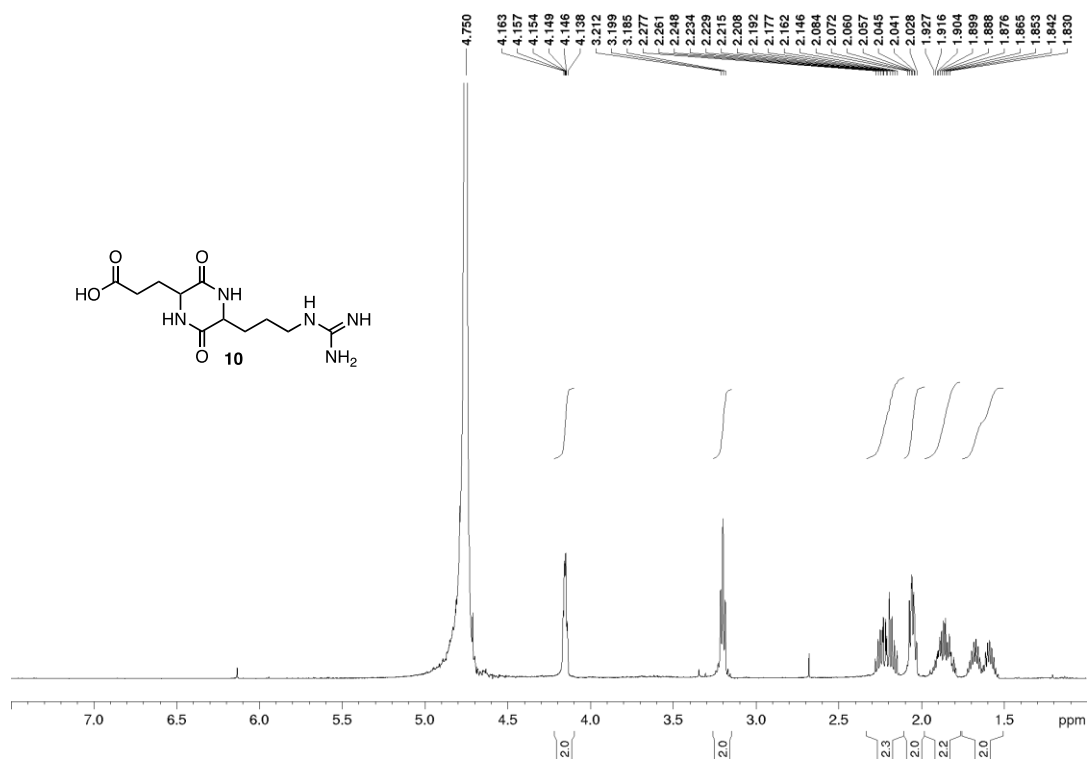

**Figure S62.**  $^{13}\text{C}$  NMR spectrum of compound **10** in  $\text{D}_2\text{O}$  (125 MHz).

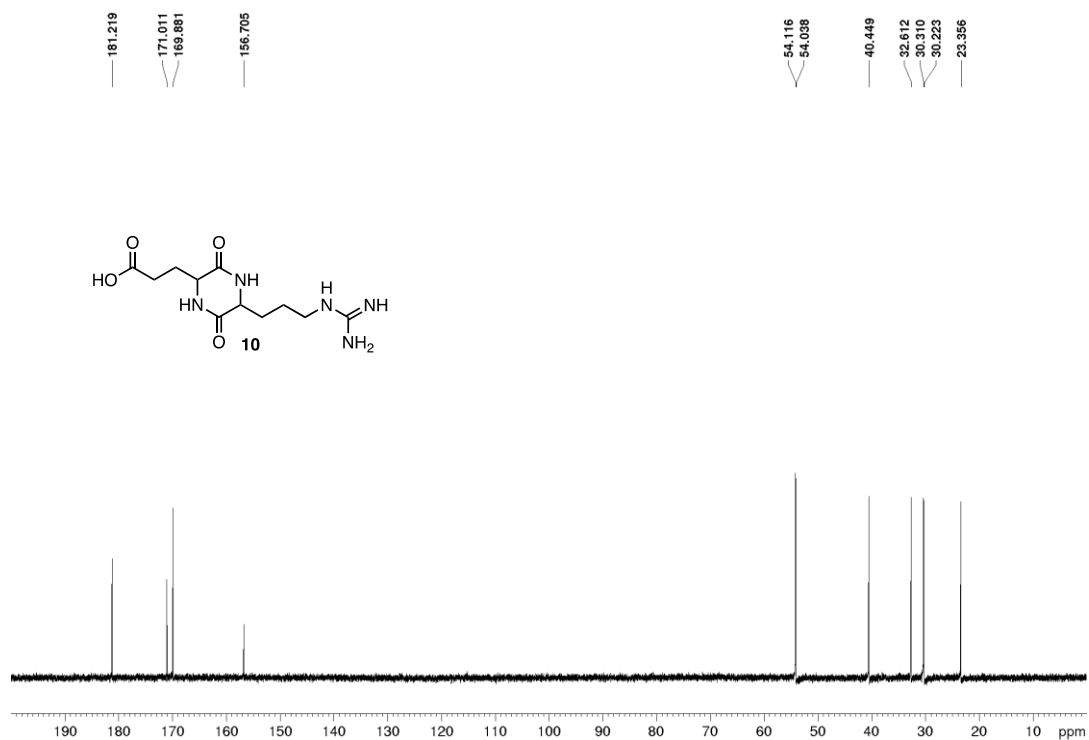

**Figure S63.**  $^1\text{H}$ - $^1\text{H}$  COSY spectrum of compound **10** in  $\text{D}_2\text{O}$  (500 MHz).

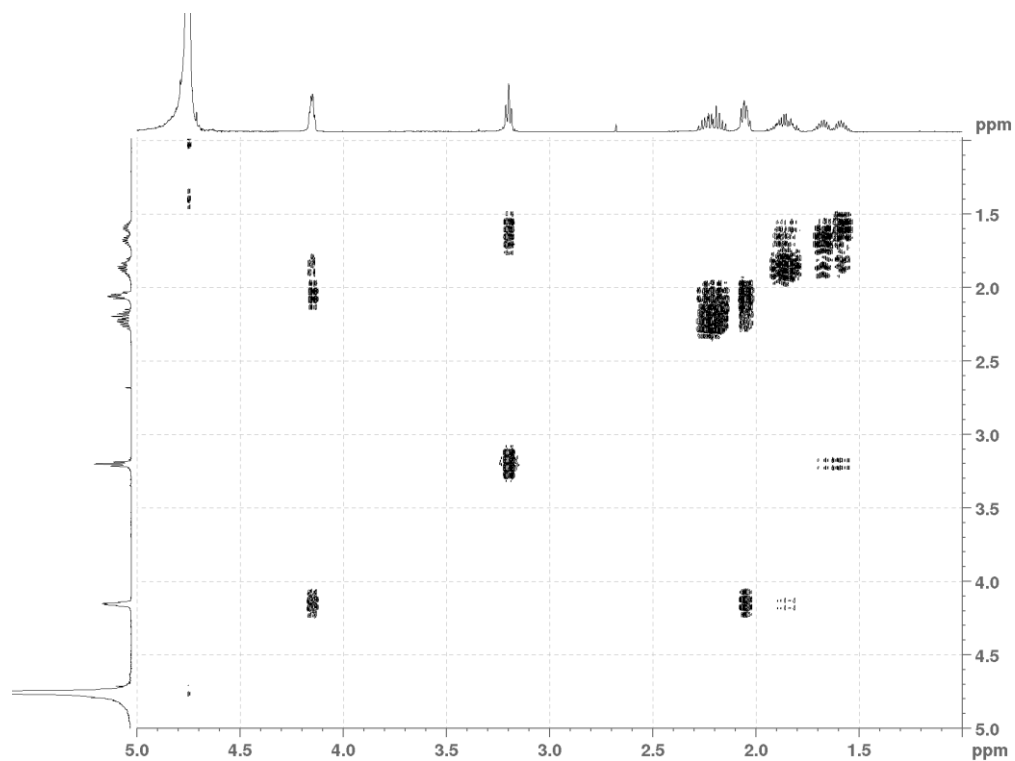

**Figure S64.** HSQC spectrum of compound **10** in  $\text{D}_2\text{O}$  (500 MHz).

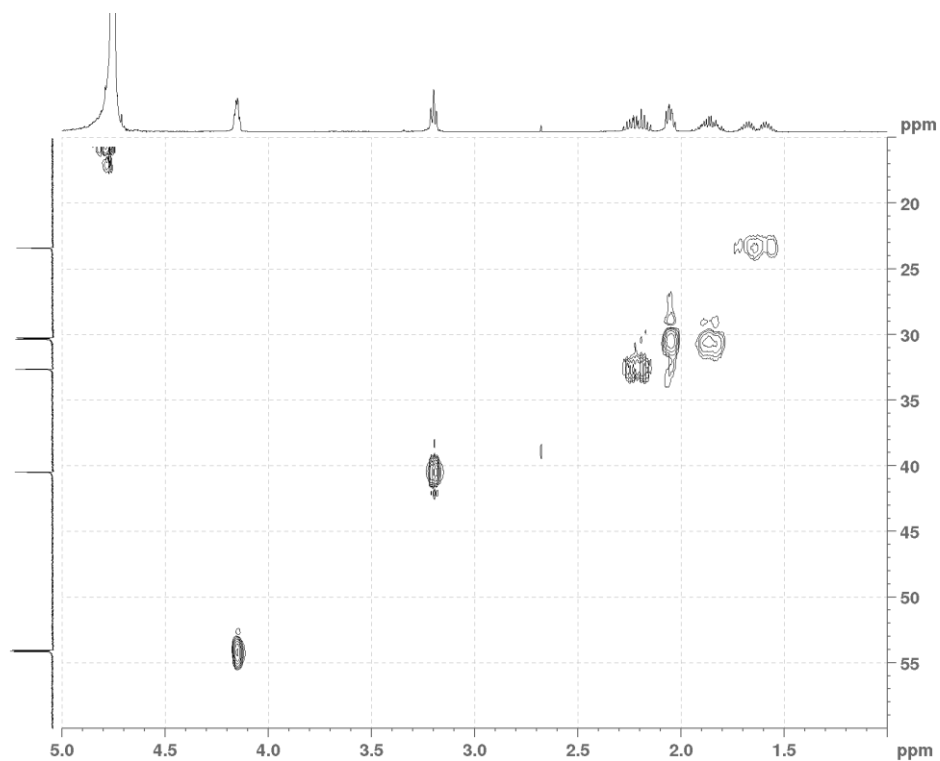

**Figure S65.** HMBC spectrum of compound **10** in D<sub>2</sub>O (500 MHz).

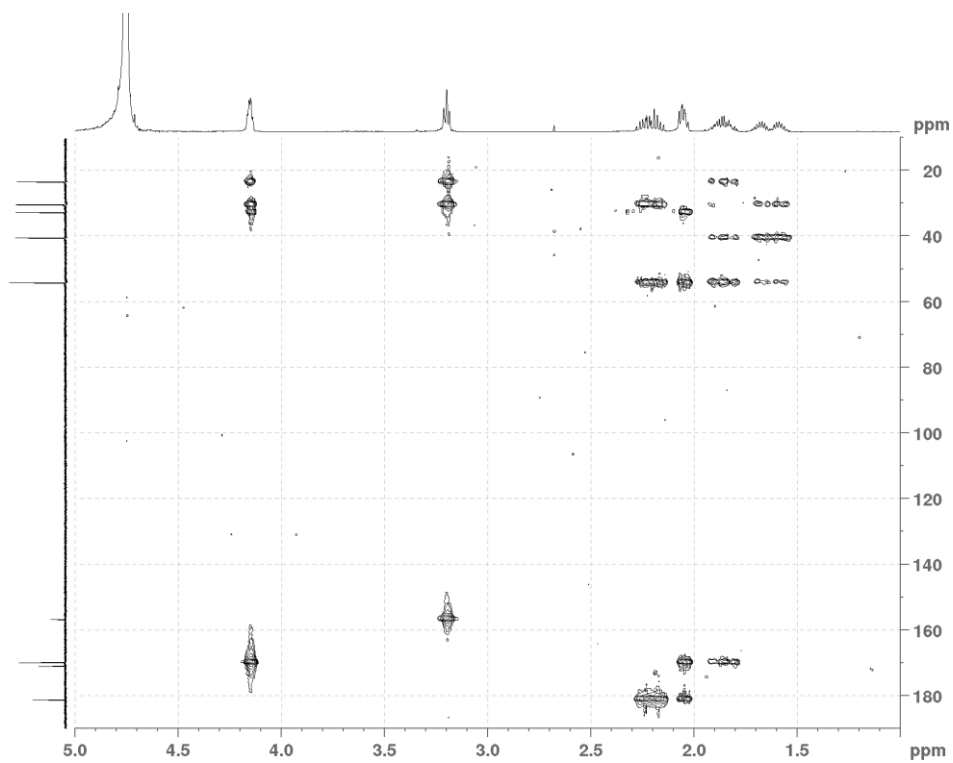



**Figure S66.**  $^1\text{H}$  NMR spectrum of compound **13** in  $\text{CD}_3\text{OD}$  (500 MHz).

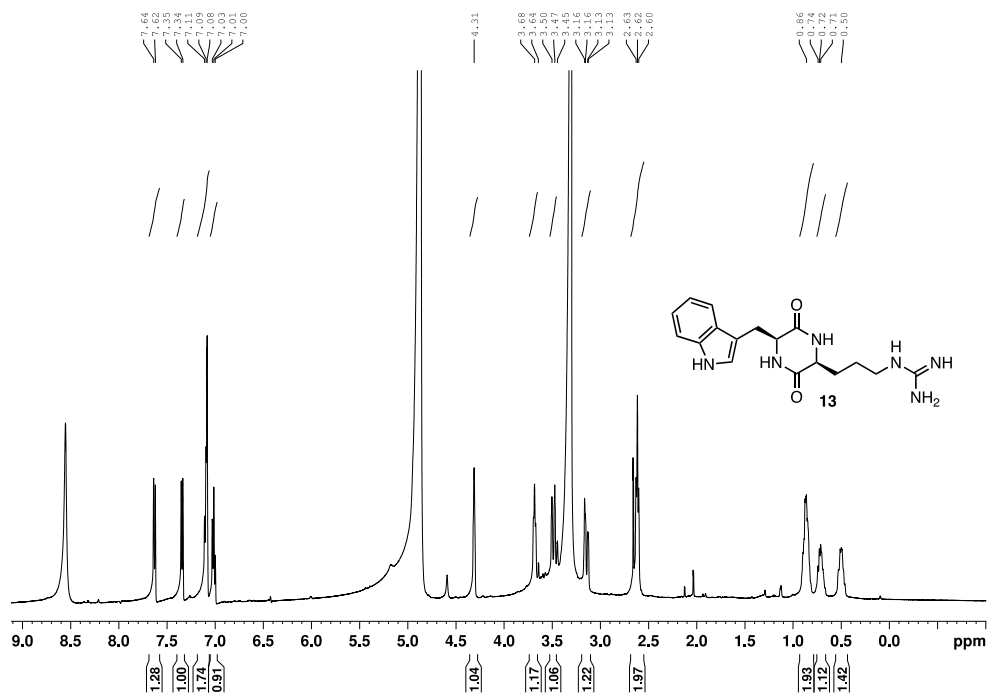

**Figure S67.**  $^{13}\text{C}$  NMR spectrum of compound **13** in  $\text{CD}_3\text{OD}$  (125 MHz).

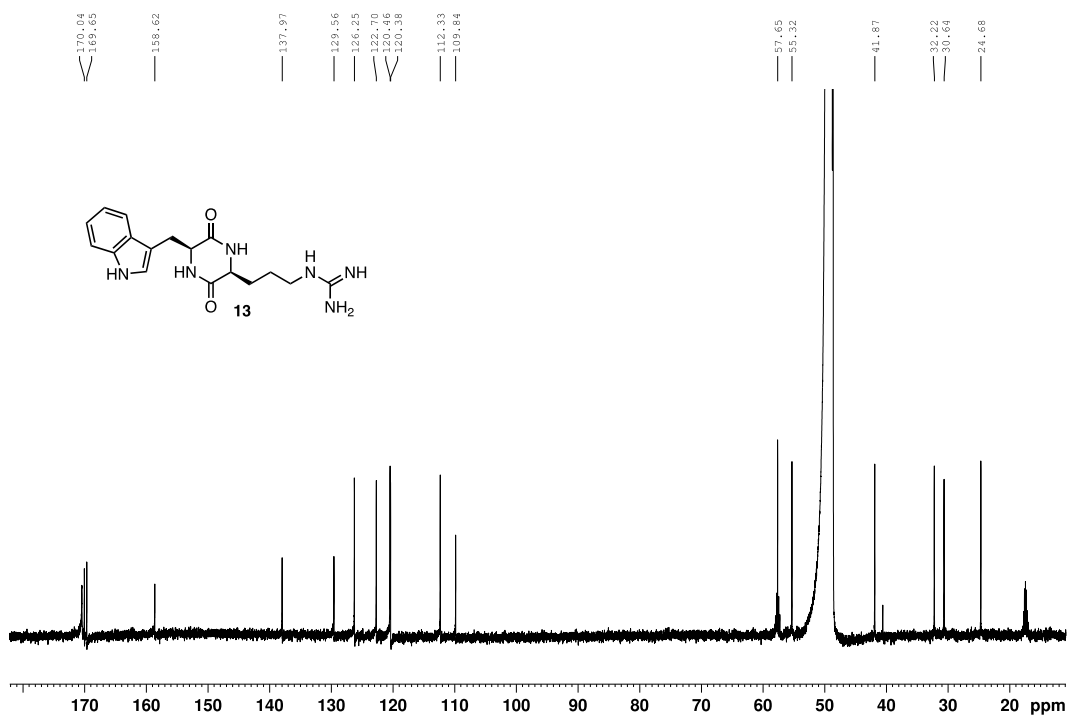

**Figure S68.**  $^1\text{H}$  NMR spectrum of compound **14** in  $\text{D}_2\text{O}$  (500 MHz).

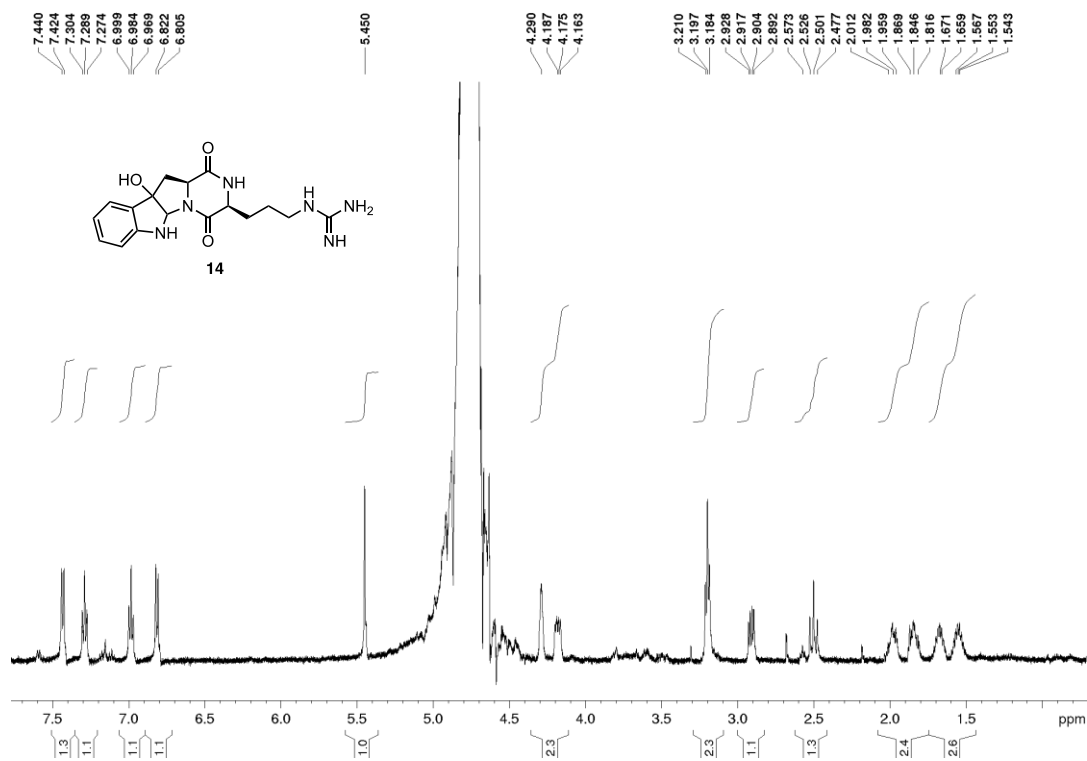

**Figure S69.**  $^{13}\text{C}$  NMR spectrum of compound **14** in  $\text{D}_2\text{O}$  (125 MHz).

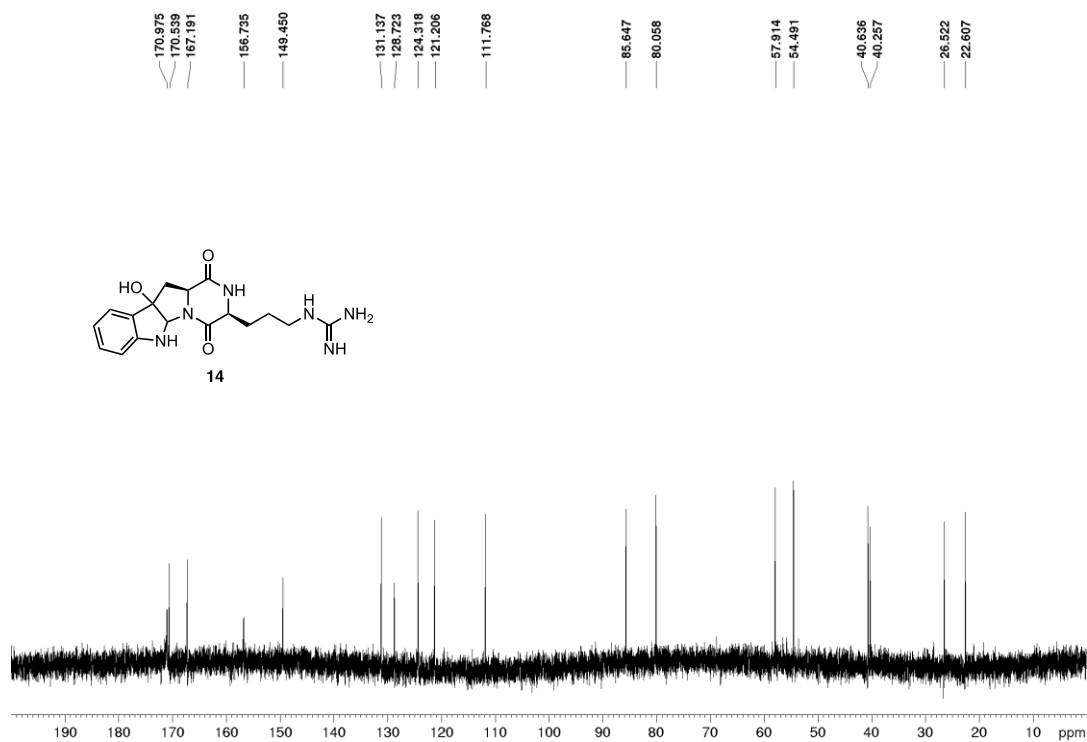

**Figure S70.**  $^1\text{H}$ - $^1\text{H}$  NMR spectrum of compound **14** in  $\text{D}_2\text{O}$  (500 MHz).

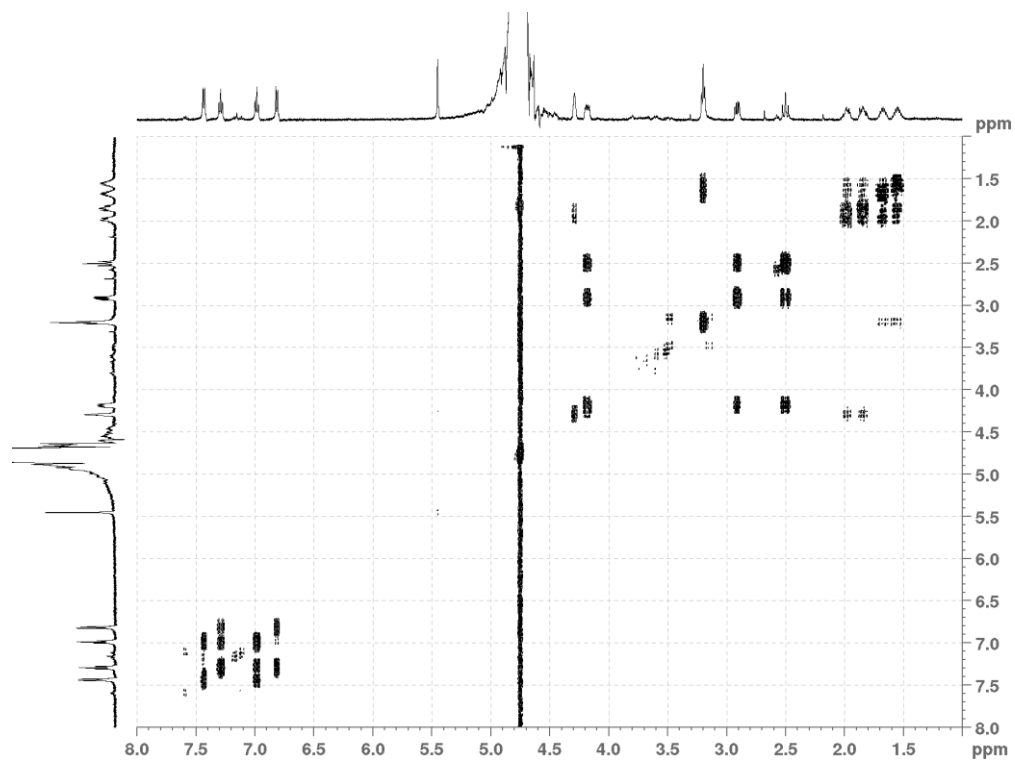

**Figure S71.** HSQC spectrum of compound **14** in  $\text{D}_2\text{O}$  (500 MHz).

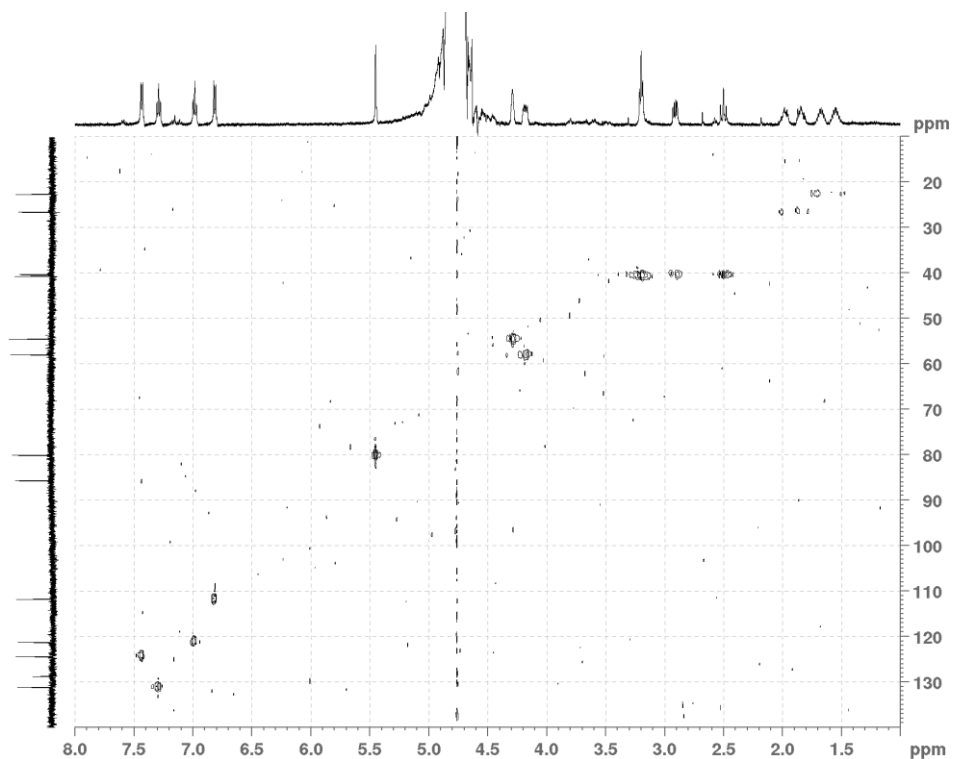

**Figure S72.** HMBC spectrum of compound **14** in D<sub>2</sub>O (500 MHz).

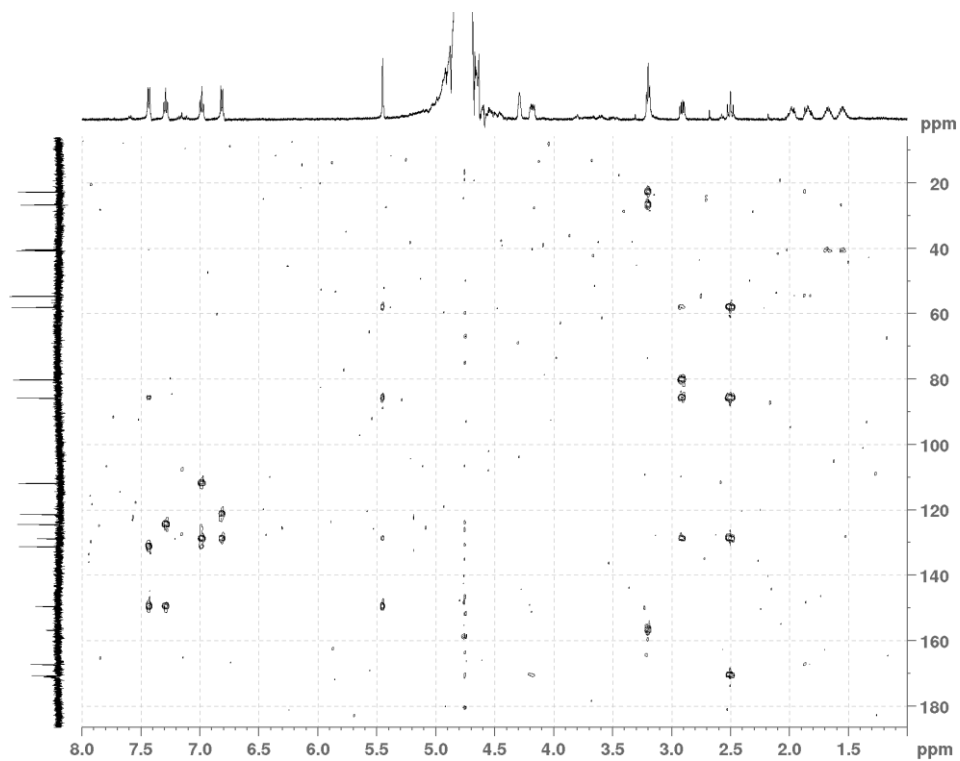

**Figure S73.**  $^1\text{H}$  NMR spectrum of compound **15** in  $\text{D}_2\text{O}$  (500 MHz).

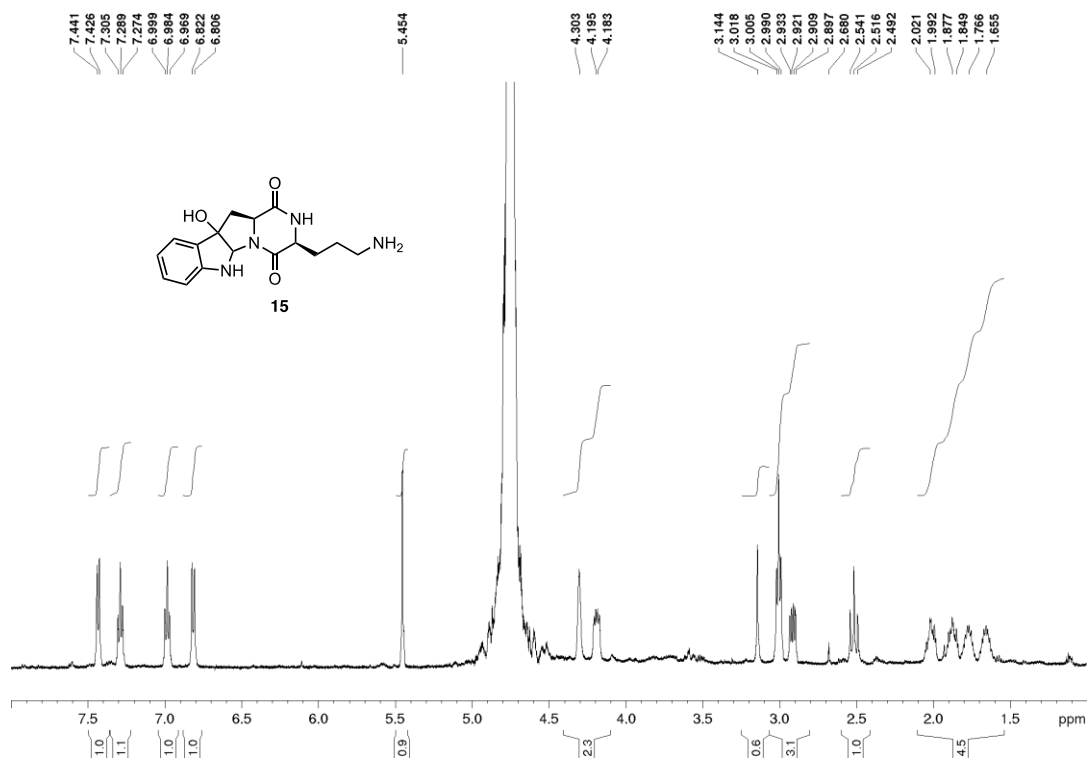

Figure S74.  $^{13}\text{C}$  NMR spectrum of compound **15** in  $\text{D}_2\text{O}$  (125 MHz).

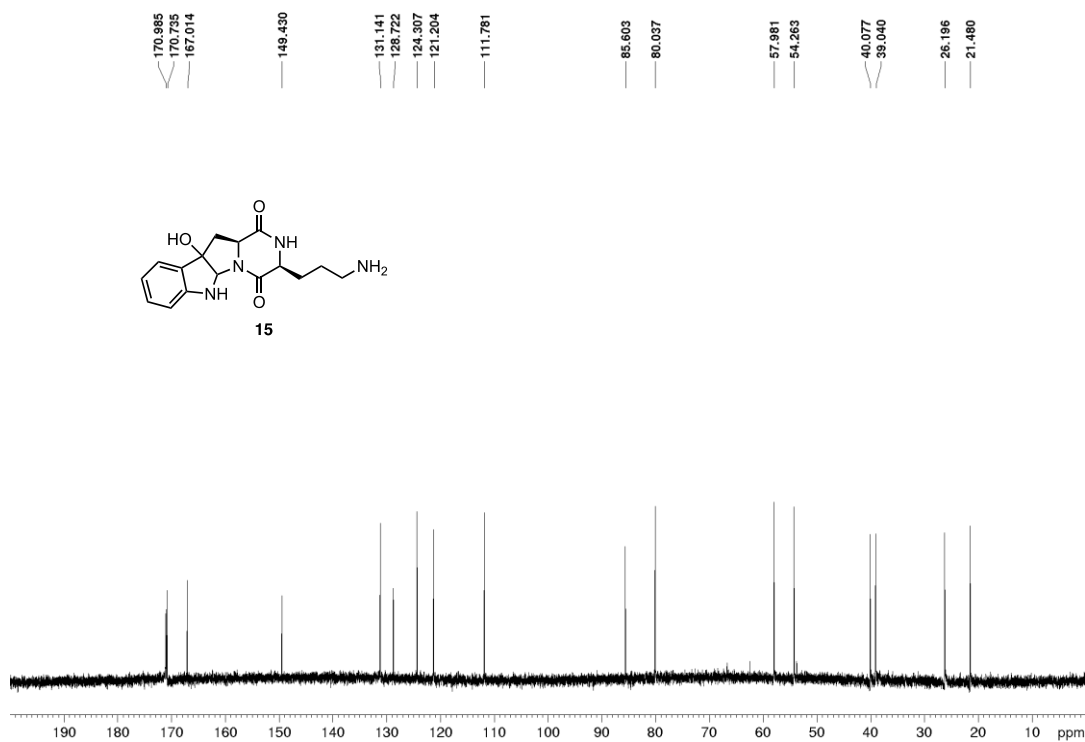

Figure S75.  $^1\text{H}$  -  $^1\text{H}$  COSY spectrum of compound **15** in  $\text{D}_2\text{O}$  (500 MHz).

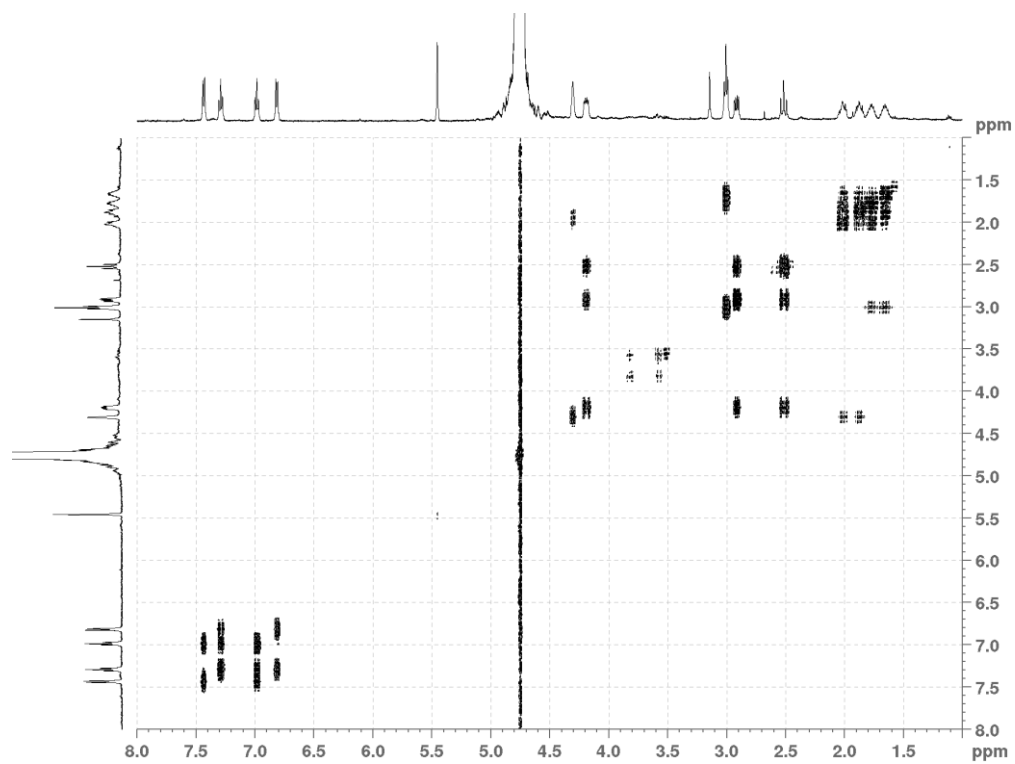

**Figure S76.** HSQC spectrum of compound **15** in D<sub>2</sub>O (500 MHz).

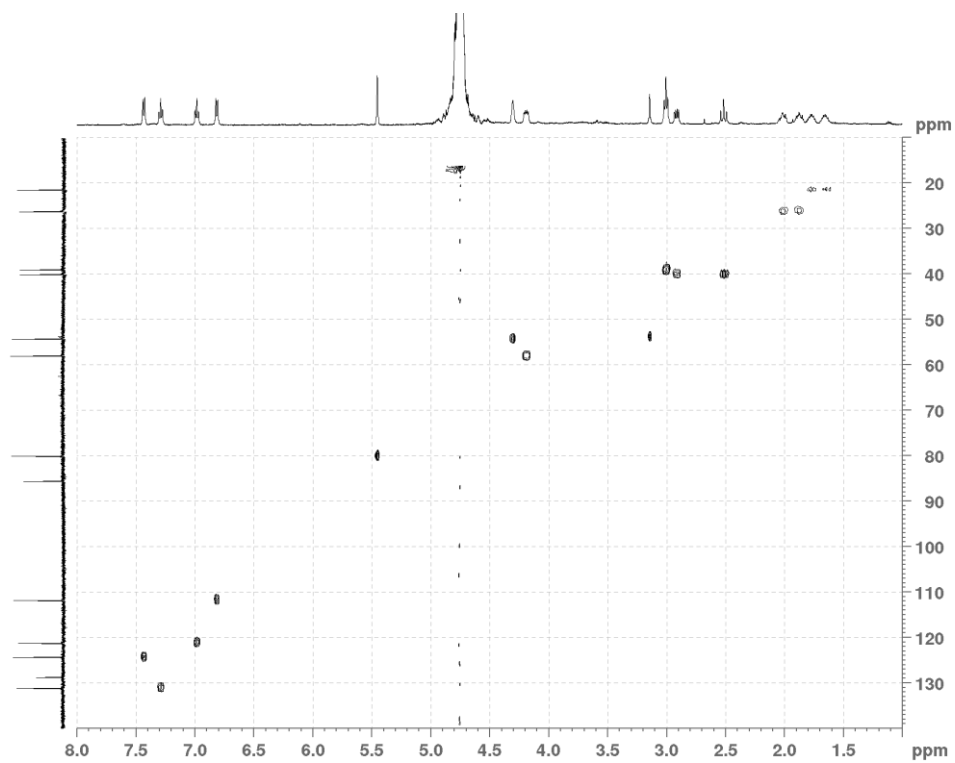

**Figure S77.** HMBC spectrum of compound **15** in D<sub>2</sub>O (500 MHz).

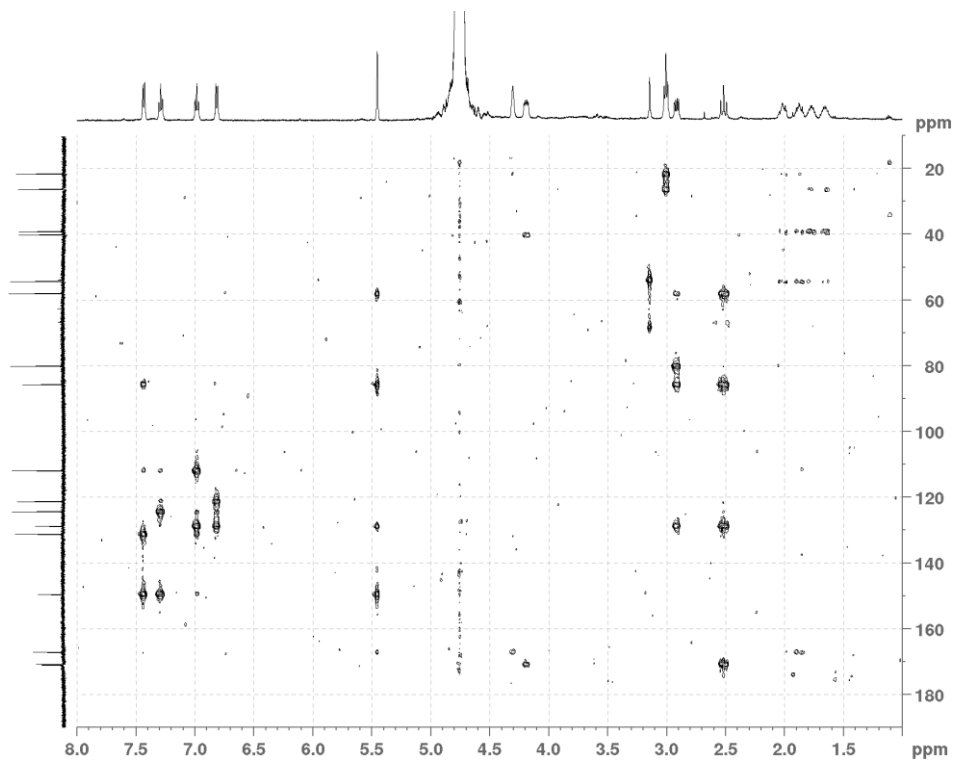





**Figure S78.**  $^1\text{H}$  NMR spectrum of compound **16** in  $\text{D}_2\text{O}$  0.5% TFA-*d* (500 MHz).

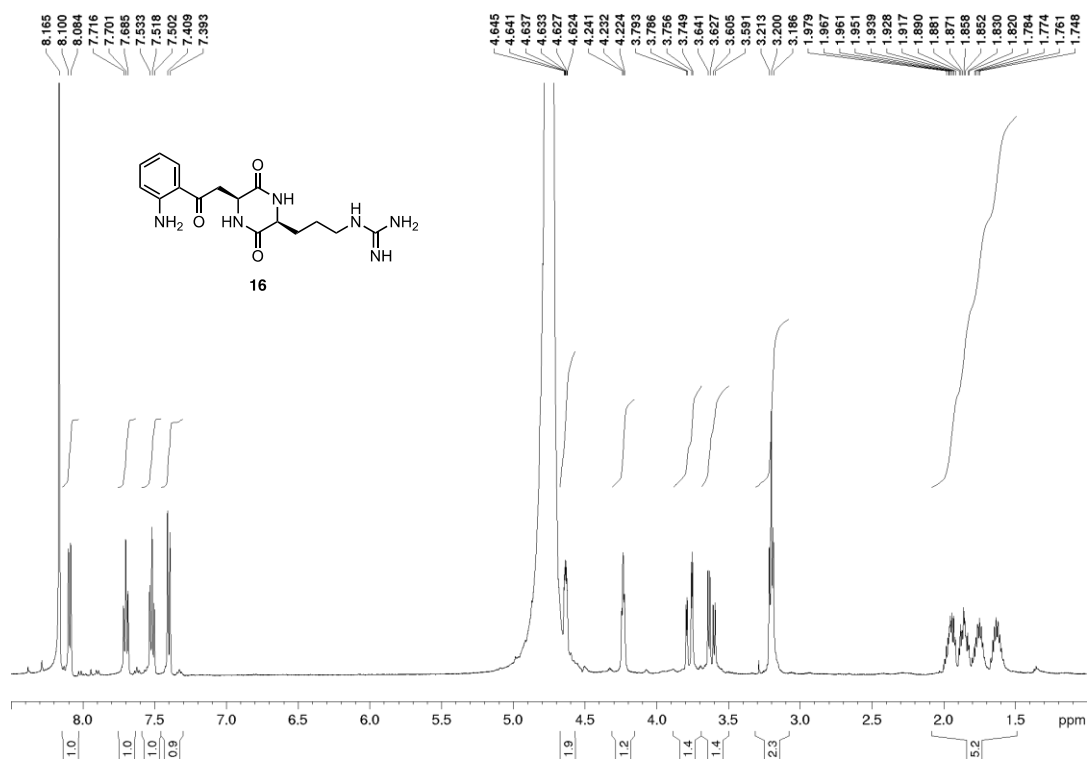

**Figure S79.**  $^{13}\text{C}$  NMR spectrum of compound **16** in  $\text{D}_2\text{O}$  0.5% TFA-*d* (125 MHz).

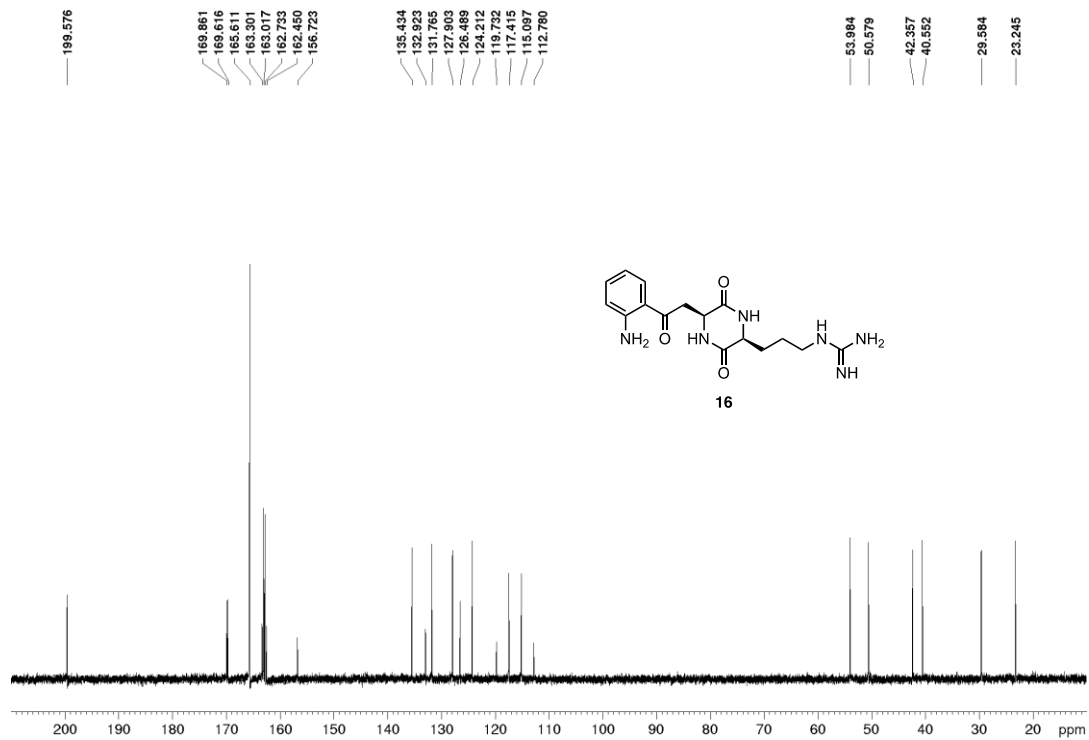

**Figure S80.**  $^1\text{H}$ - $^1\text{H}$  COSY spectrum of compound **16** in  $\text{D}_2\text{O}$  0.5% TFA-*d* (500 MHz).

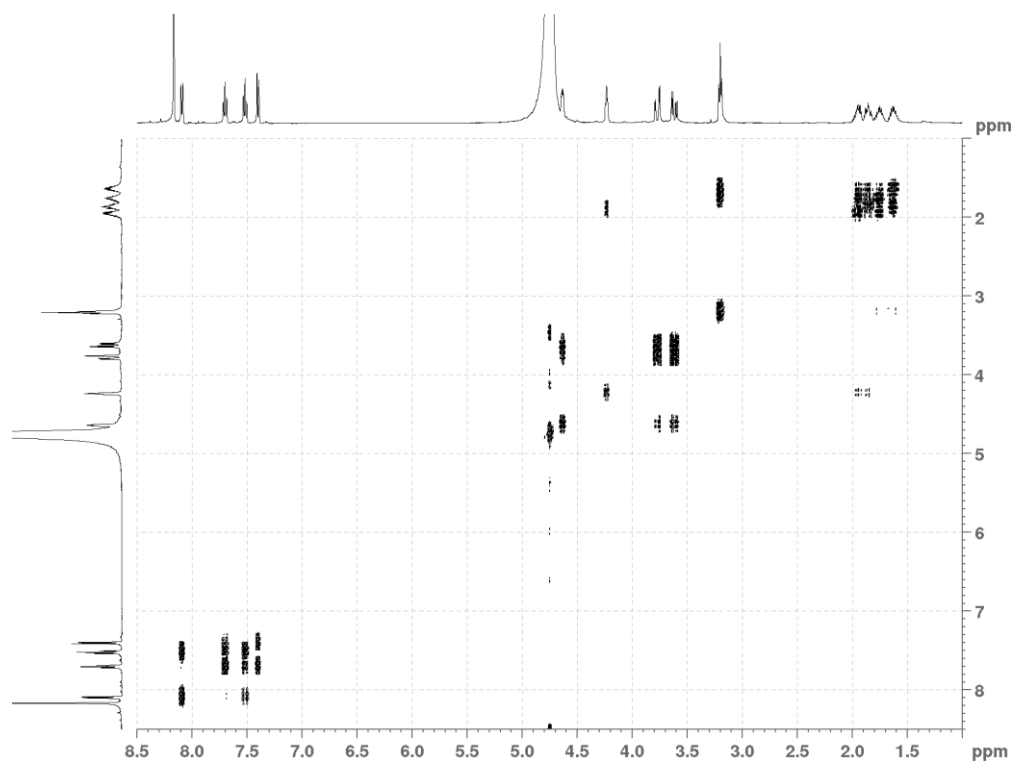

**Figure S81.** HSQC spectrum of compound **16** in  $\text{D}_2\text{O}$  0.5% TFA-*d* (500 MHz).

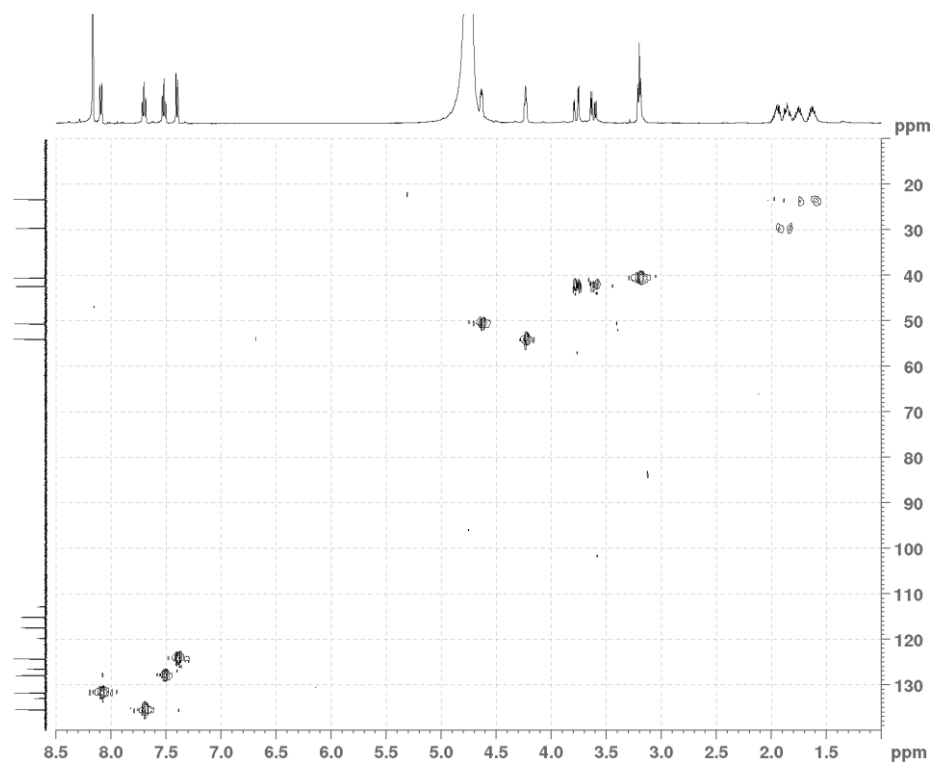

**Figure S82.** HMBC spectrum of compound **16** in D<sub>2</sub>O 0.5% TFA-*d* (500 MHz).

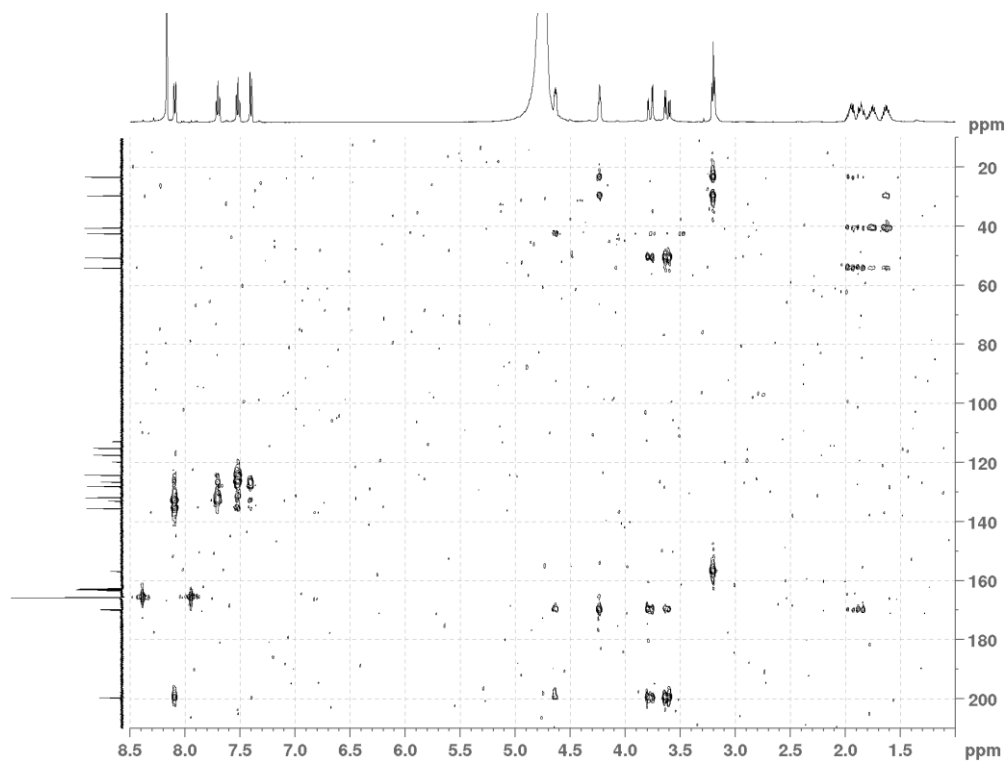

**Figure S83.**  $^1\text{H}$  NMR spectrum of compound **17** in  $\text{D}_2\text{O}$  0.5%  $\text{TFA-}d$  (500 MHz).

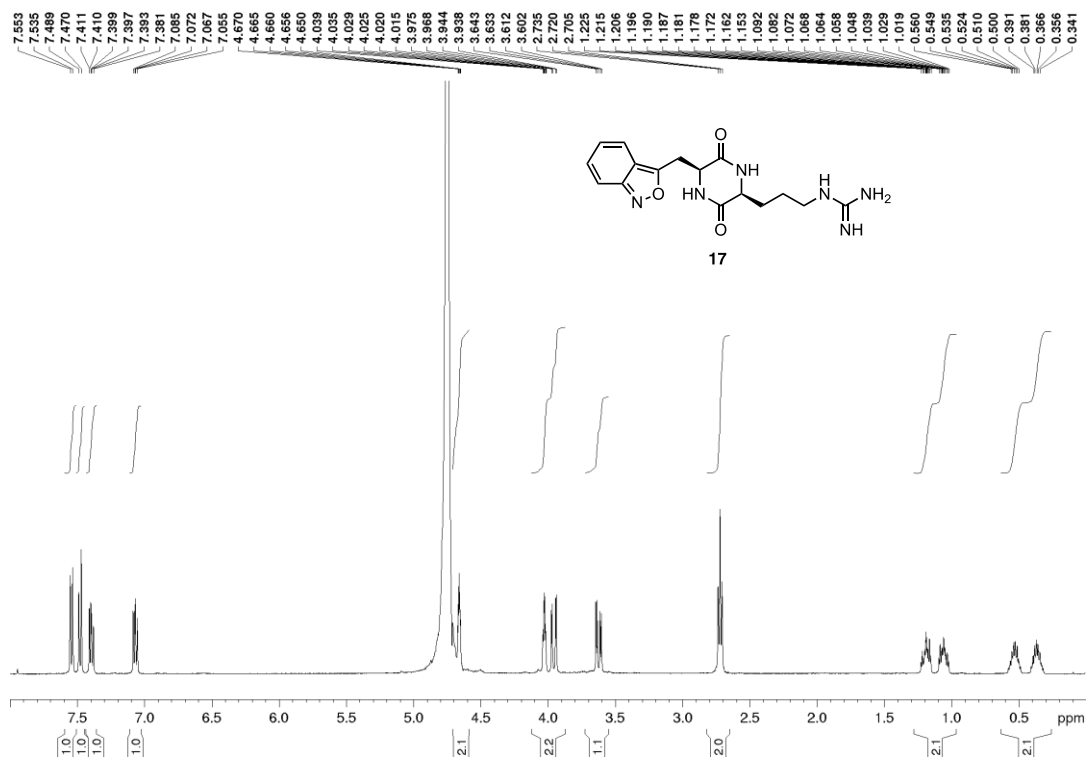

**Figure S84.**  $^{13}\text{C}$  NMR spectrum of compound **17** in  $\text{D}_2\text{O}$  0.5%  $\text{TFA-}d$  (125 MHz).

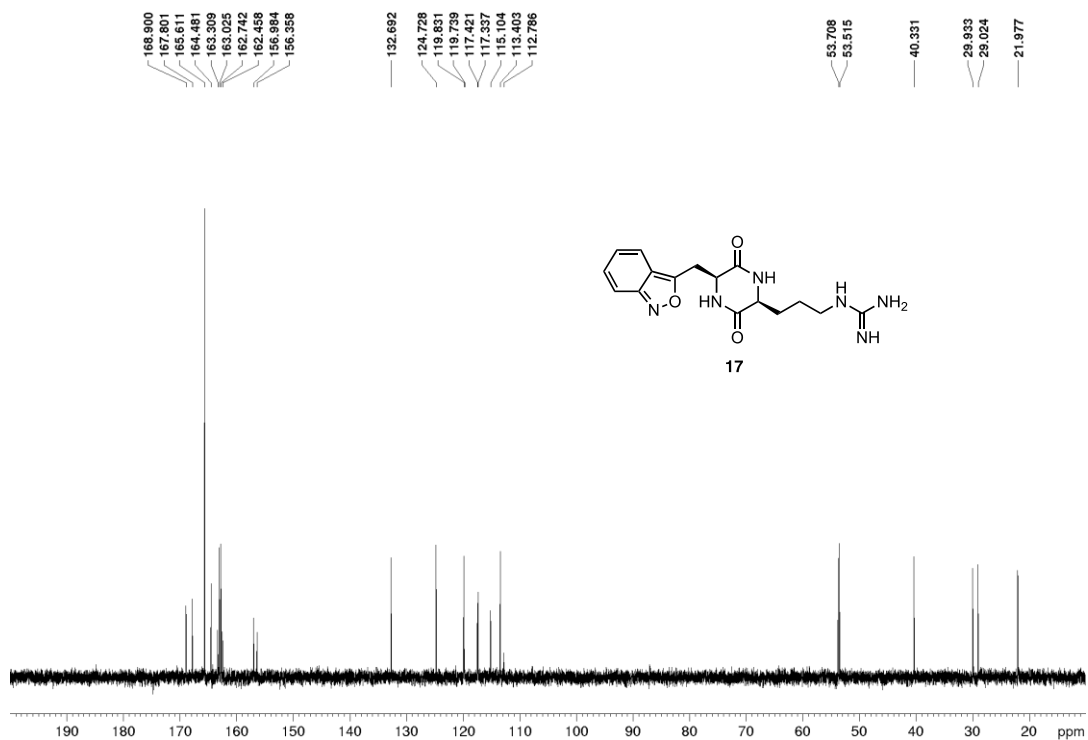

**Figure S85.**  $^1\text{H}$ - $^1\text{H}$  COSY spectrum of compound **17** in  $\text{D}_2\text{O}$  0.5% TFA-*d* (500 MHz).

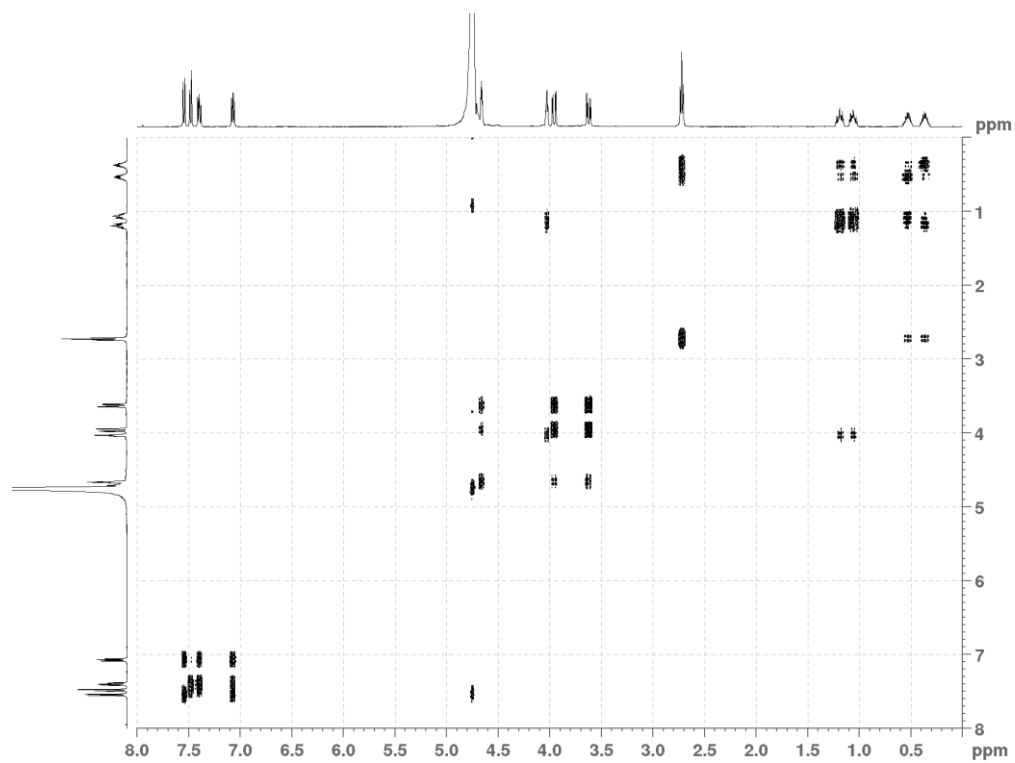

**Figure S86.** HSQC spectrum of compound **17** in  $\text{D}_2\text{O}$  0.5% TFA-*d* (500 MHz).

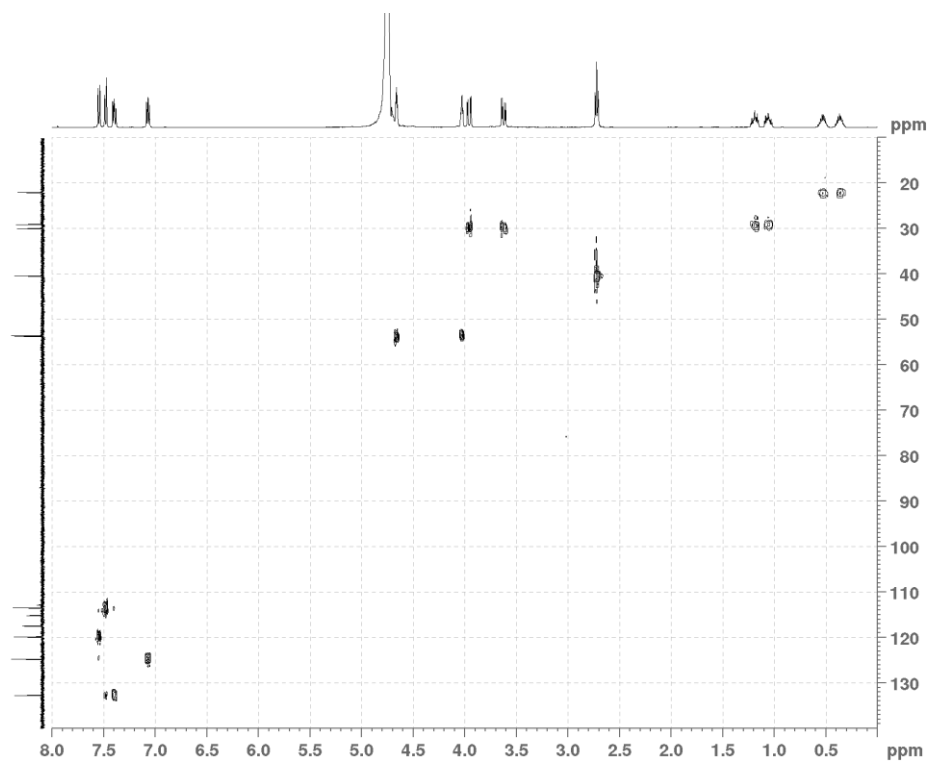

**Figure S87.** HMBC spectrum of compound **17** in D<sub>2</sub>O 0.5% TFA-*d* (500 MHz).

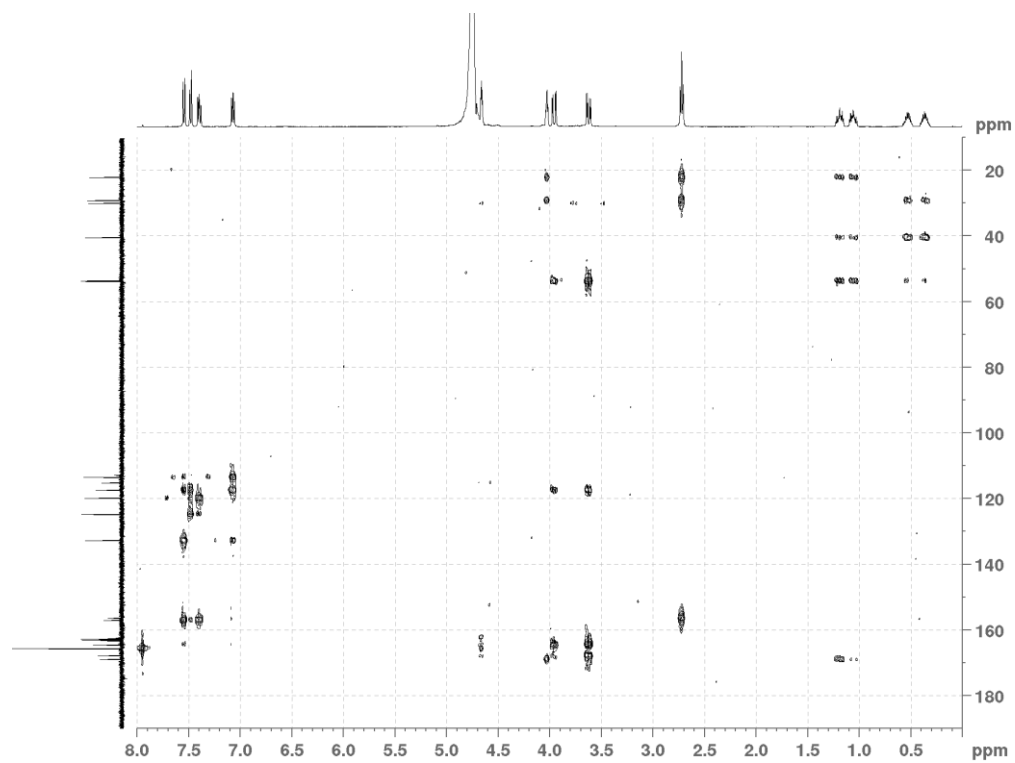

**Figure S88.**  $^1\text{H}$  NMR spectrum of compound **18** in  $\text{DMSO-}d_6$  (500 MHz).

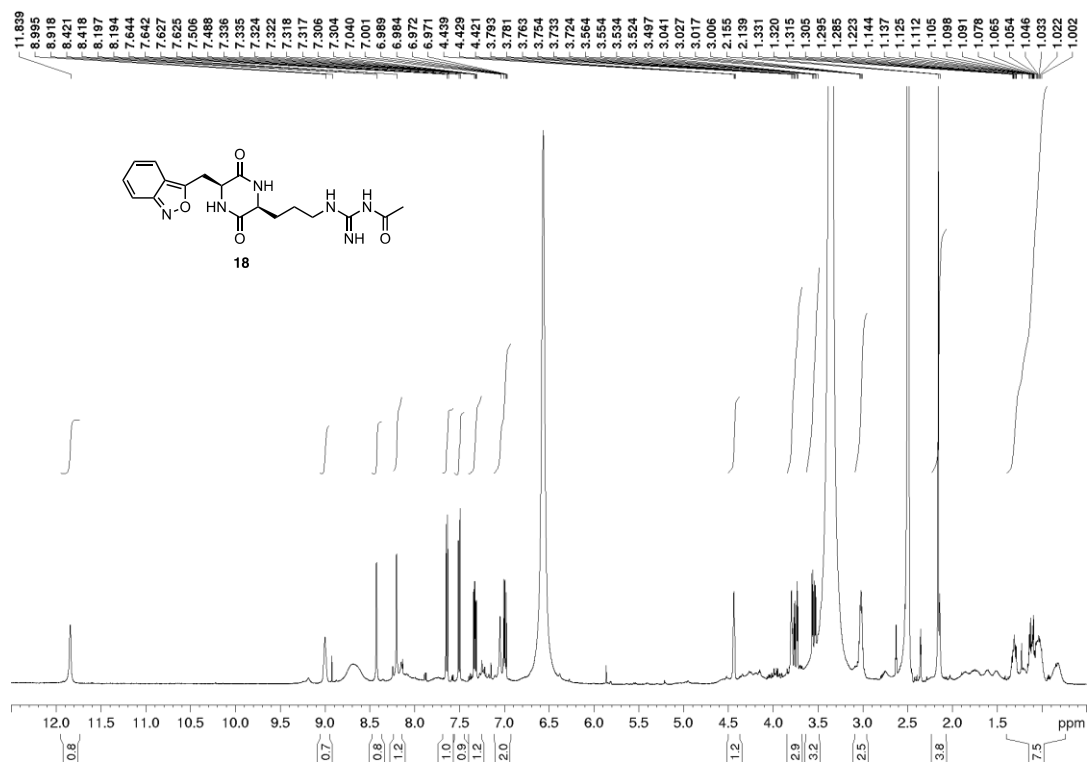

**Figure S89.**  $^{13}\text{C}$  NMR spectrum of compound **18** in  $\text{DMSO-}d_6$  (125 MHz).

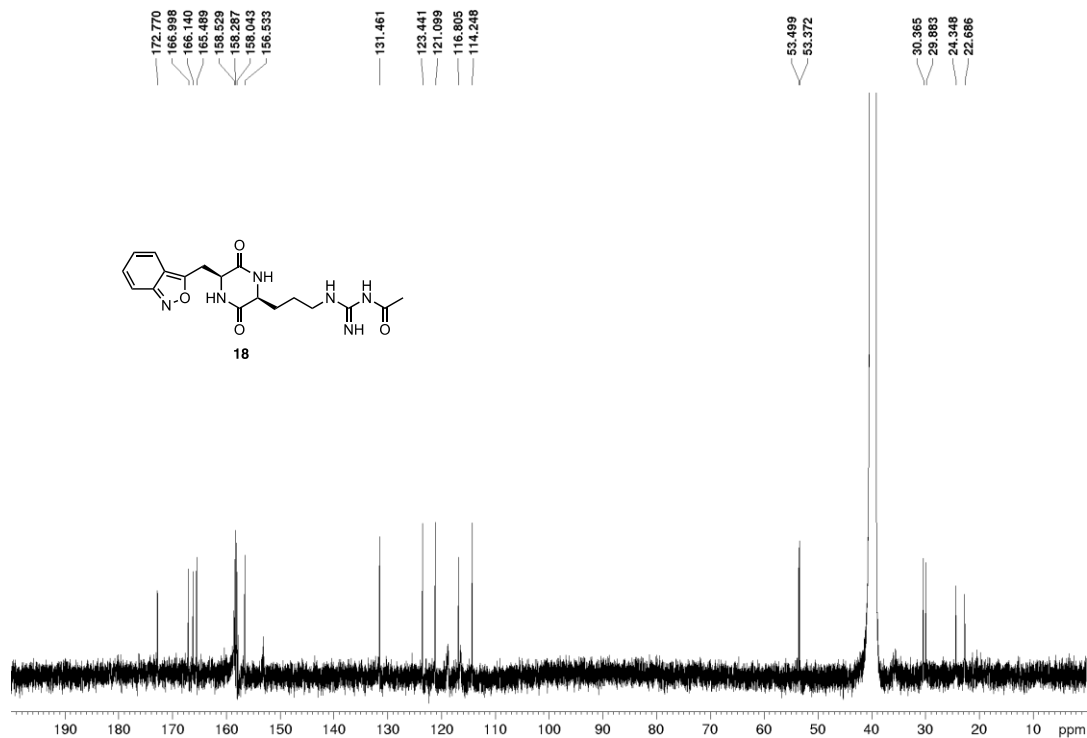

**Figure S90.**  $^1\text{H}$ - $^1\text{H}$  COSY spectrum of compound **18** in  $\text{DMSO-}d_6$  (500 MHz).

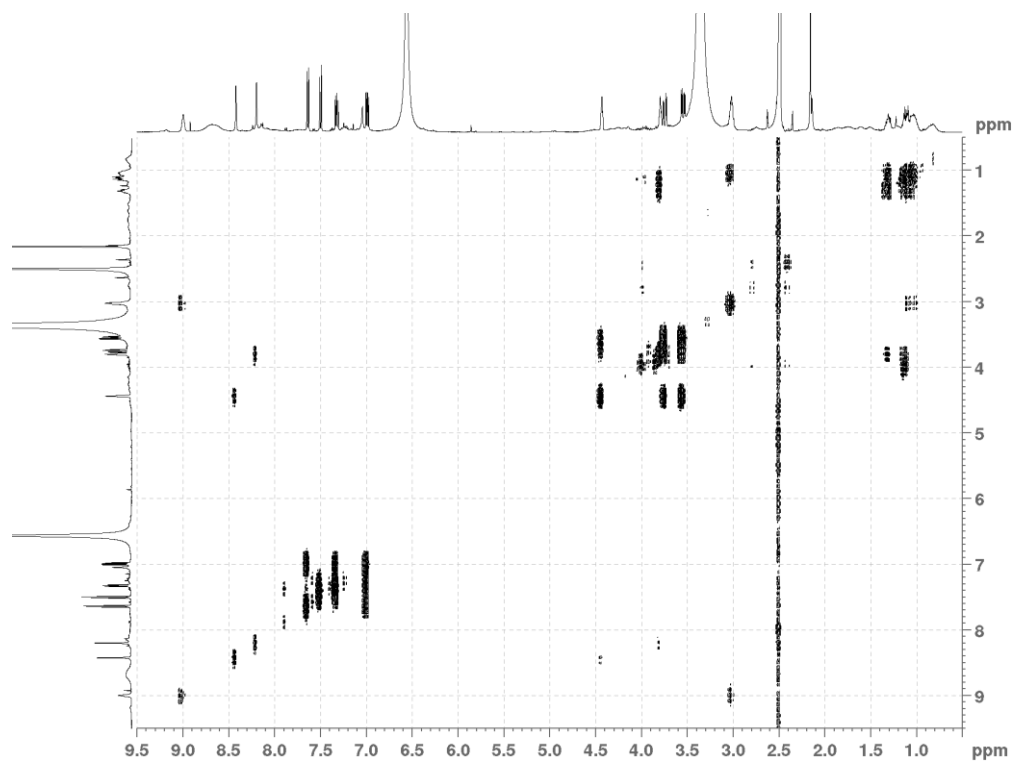

**Figure S91.** HSQC spectrum of compound **18** in  $\text{DMSO-}d_6$  (500 MHz).

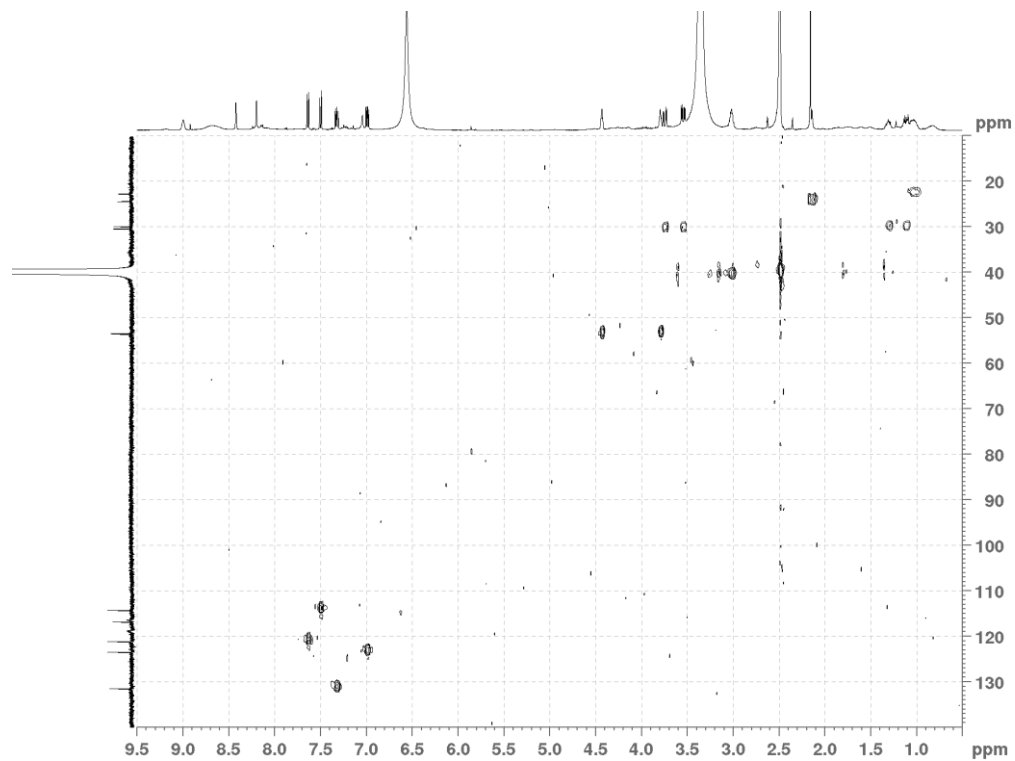



**Figure S92.** HMBC spectrum of compound **18** in DMSO-*d*<sub>6</sub> (500 MHz).

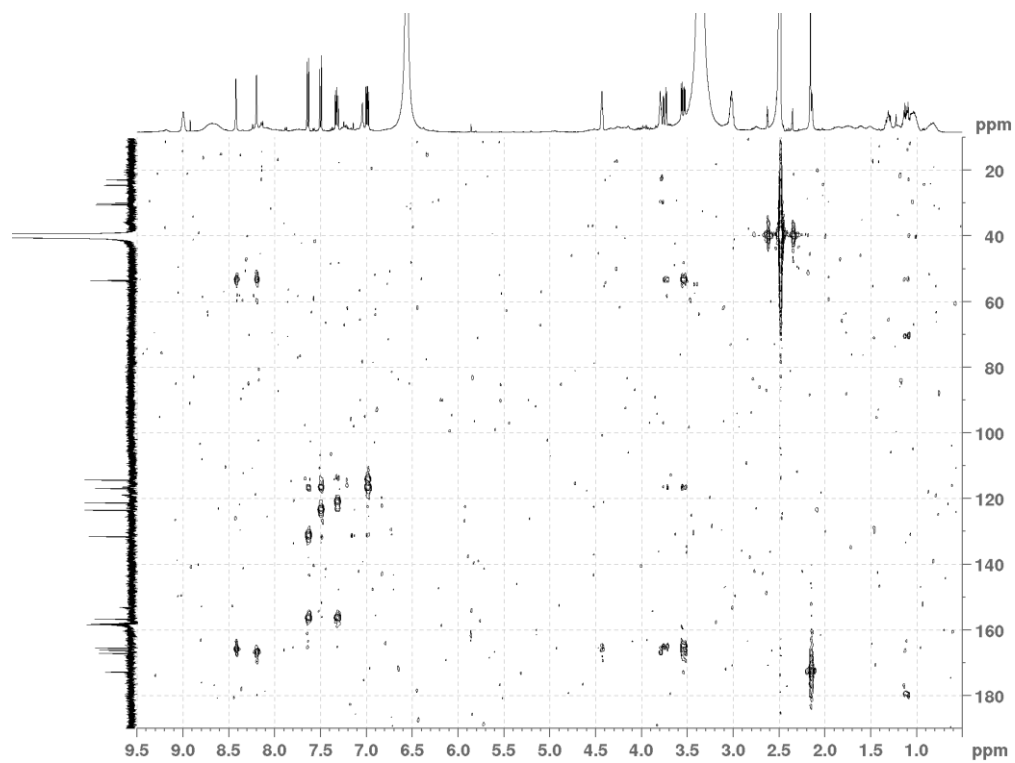

**Figure S93.** ROESY spectrum of compound **18** in DMSO-*d*<sub>6</sub> (500 MHz).

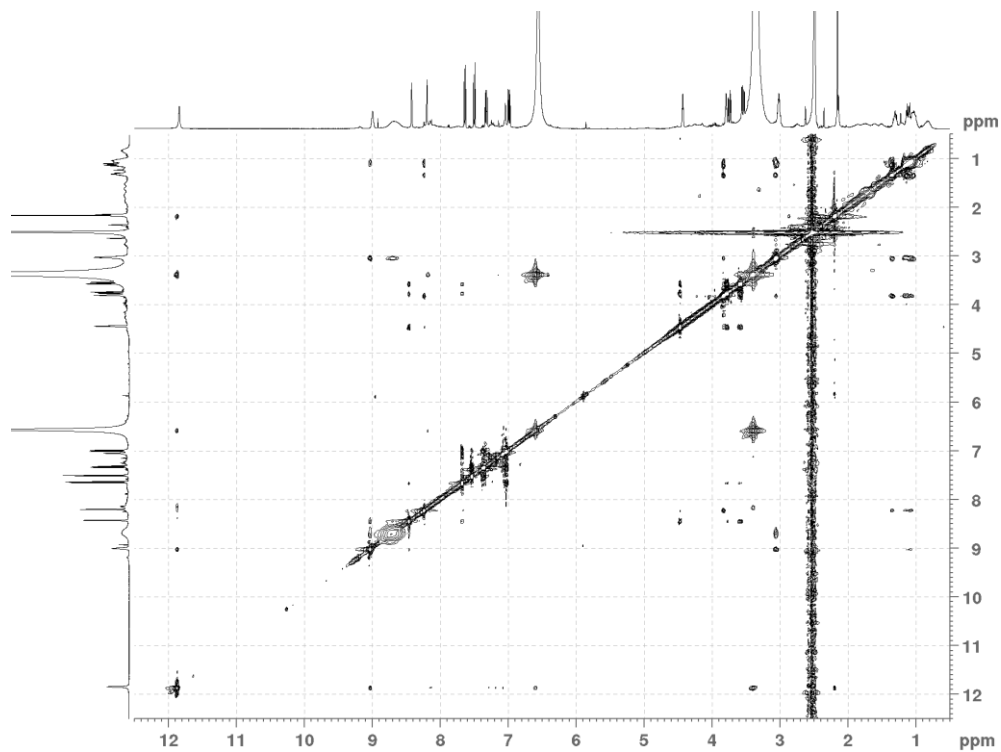

$^1\text{H}$  NMR spectra of previously isolated diketopiperazines

**Figure S94.**  $^1\text{H}$  NMR spectrum of compound **7** in  $\text{DMSO-}d_6$  (500 MHz).

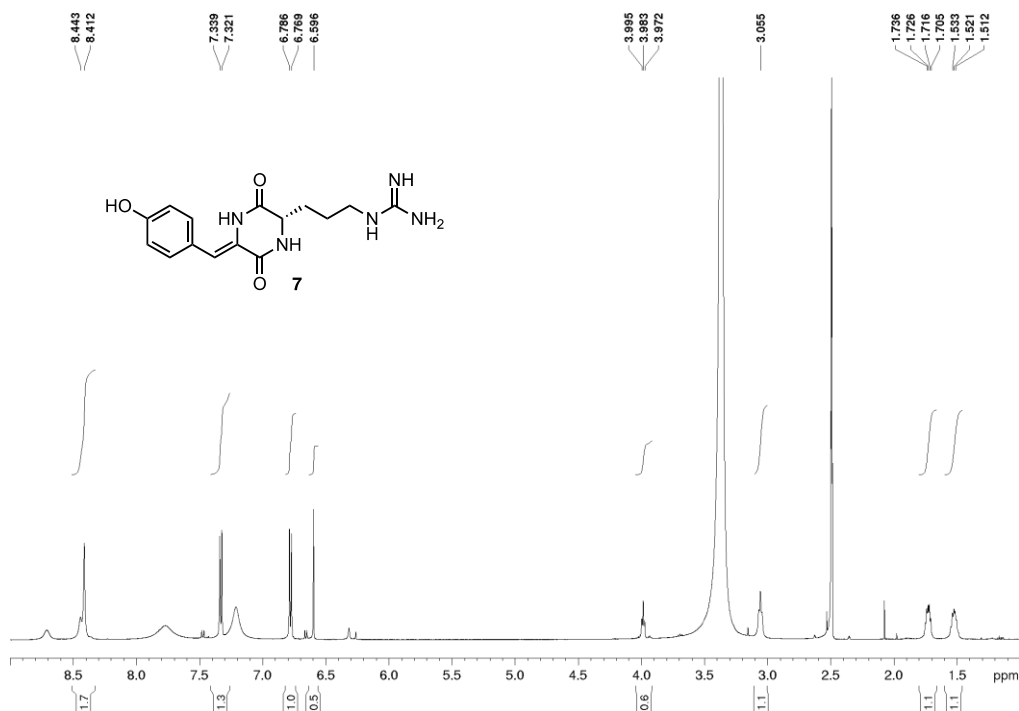

Compound **7**: HRMS (ESI,  $\text{M}+\text{H}^+$ ) calculated for  $\text{C}_{15}\text{H}_{20}\text{N}_5\text{O}_3$  318.1566; found 318.1557.

$[\alpha]_D$ : -48 (c 0.20,  $\text{H}_2\text{O}$ )

**Figure S95.**  $^1\text{H}$  NMR spectrum of compound **8** in  $\text{CD}_3\text{OD}$  (500 MHz).

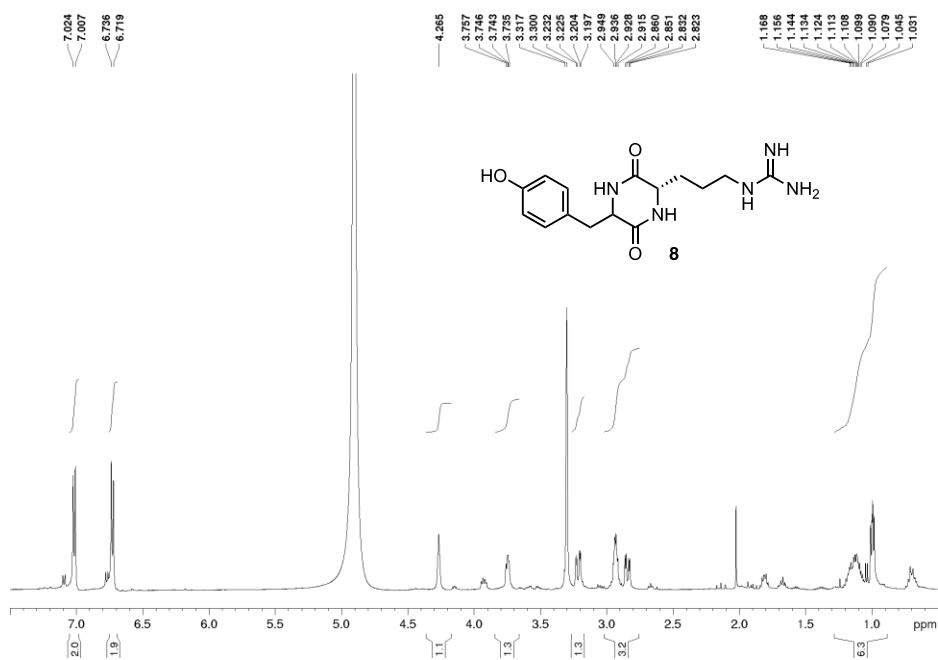

Compound **8**: HRMS (ESI,  $\text{M}+\text{H}^+$ ) calculated for  $\text{C}_{15}\text{H}_{22}\text{N}_5\text{O}_3$  320.1723; found 320.1715.

**Figure S96.**  $^1\text{H}$  NMR spectrum of compound **11** in  $\text{D}_2\text{O}$  (500 MHz).

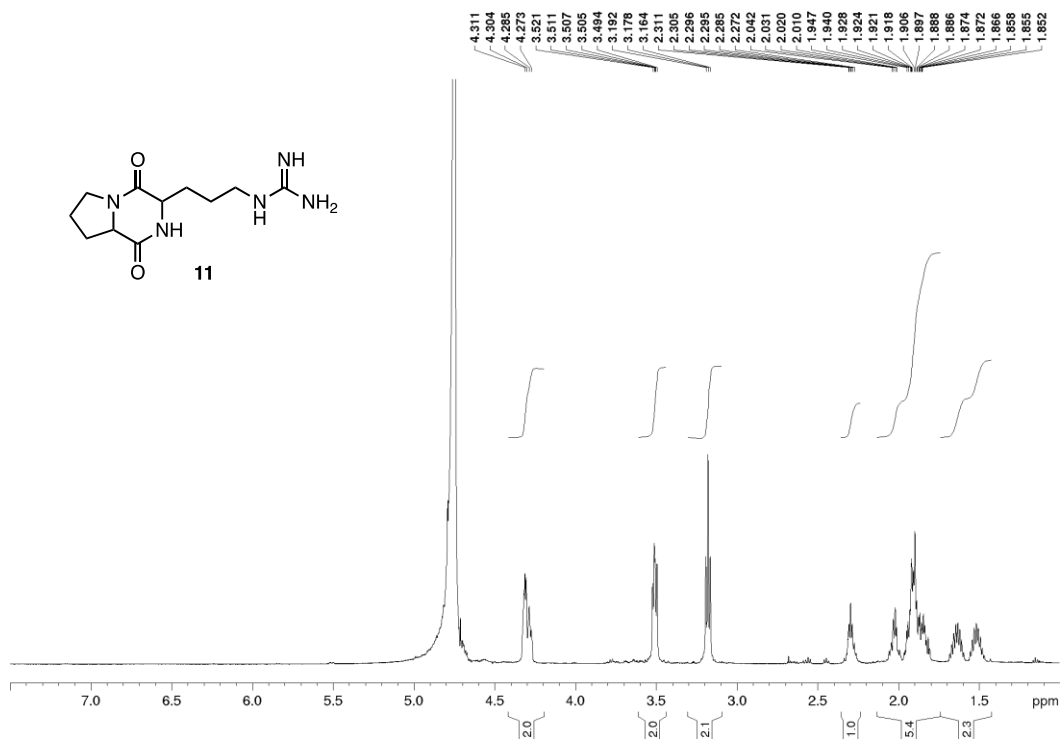

Compound **11**: HRMS (ESI,  $\text{M}+\text{H}^+$ ) calculated for  $\text{C}_{11}\text{H}_{20}\text{N}_5\text{O}_2$  254.1617; found 254.1595.

**Figure S97.**  $^1\text{H}$  NMR spectrum of compound **12** in  $\text{D}_2\text{O}$  0.5% TFA-*d* (500 MHz).

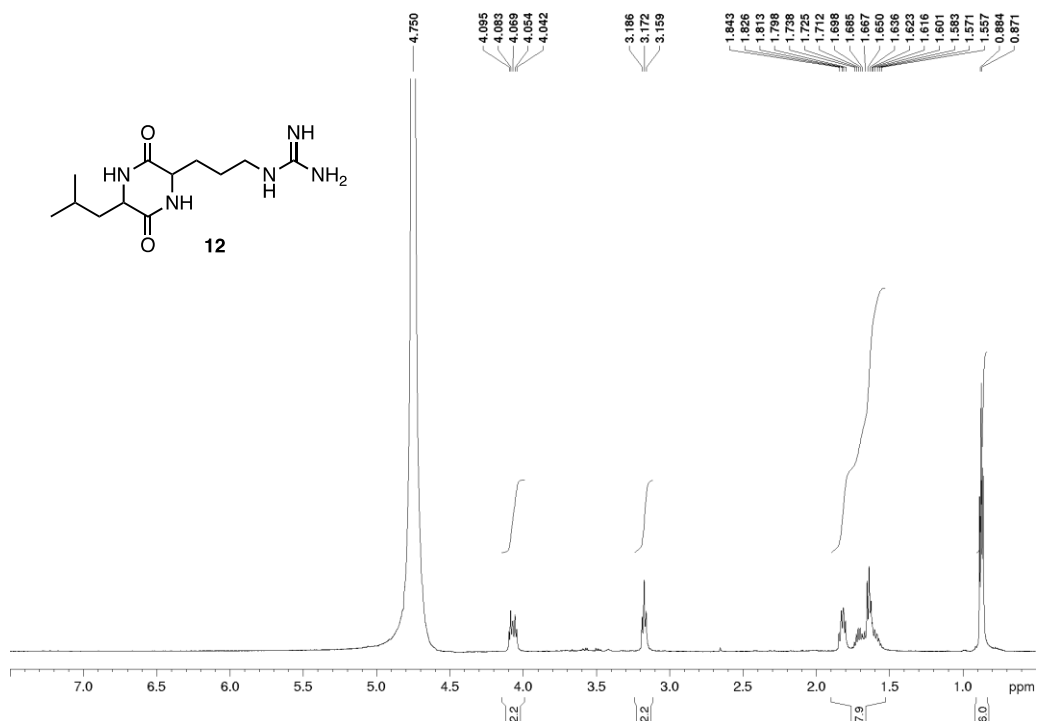

Compound **12**: HRMS (ESI,  $\text{M}+\text{H}^+$ ) calculated for  $\text{C}_{12}\text{H}_{24}\text{N}_5\text{O}_2$  270.1930; found 270.1933.

## REFERENCES

1. Tsukamoto, S., Kato, H., Hirota, H. & Fusetani, N. Pipecolate derivatives, anthosamines A and B, inducers of larval metamorphosis in ascidians, from a marine sponge *Anthosigmella* aff. *raromicrosclera*. *Tetrahedron* **51**, 6687–6694 (1995).
2. Tohyama, S. *et al.* Discovery and Characterization of NK13650s, Naturally Occurring p300-Selective Histone Acetyltransferase Inhibitors. *J. Org. Chem.* **77**, 9044–9052 (2012).
3. Li, X. *et al.* Determination of Absolute Configuration and Conformation of a Cyclic Dipeptide by NMR and Chiral Spectroscopic Methods. *J. Phys. Chem. A* **117**, 1721–1736 (2013).
4. Zhang, M., Meng, Y., Wu, Y. & Song, C. TfOH-Promoted Decyanative Cyclization toward the Synthesis of 2,1-Benzisoxazoles. *J. Org. Chem.* **86**, 7326–7332 (2021).
5. Mannam, S. & Sekar, G. An enantiopure galactose oxidase model: synthesis of chiral amino alcohols through oxidative kinetic resolution catalyzed by a chiral copper complex. *Tetrahedron Asymmetry* **20**, 497–502 (2009).
6. Bat-Erdene, U. *et al.* Iterative Catalysis in the Biosynthesis of Mitochondrial Complex II Inhibitors Harzianopyridone and Atpenin B. *J. Am. Chem. Soc.* **142**, 8550–8554 (2020).
7. Jumper, J. *et al.* Highly accurate protein structure prediction with AlphaFold. *Nature* **596**, 583–589 (2021).
8. Moutiez, M. *et al.* Unravelling the mechanism of non-ribosomal peptide synthesis by cyclodipeptide synthases. *Nat. Commun.* **5**, 5141 (2014).
9. Kreitler, D. F., Gemmell, E. M., Schaffer, J. E., Wencewicz, T. A. & Gulick, A. M. The structural basis of N-acyl- $\alpha$ -amino- $\beta$ -lactone formation catalyzed by a nonribosomal peptide synthetase. *Nat. Commun.* **10**, 3432 (2019).

10. Koch, A. A. *et al.* A Single Active Site Mutation in the Pikromycin Thioesterase Generates a More Effective Macrocyclization Catalyst. *J. Am. Chem. Soc.* **139**, 13456–13465 (2017).
11. Vijayasathy, S. *et al.* C3 and 2D C3 Marfey's Methods for Amino Acid Analysis in Natural Products. *J. Nat. Prod.* **79**, 421–427 (2016).
